# Supplementary material for: Genetic basis of the oil biosynthesis in ultra-high-oil maize grains with an oil content exceeding 20%
Source: Front Plant Sci. 2023 May 12;14:1168216. doi: 10.3389/fpls.2023.1168216 (PMC10213527; doi:10.3389/fpls.2023.1168216)
Supplement: Supplementary file 1 [file Table_1.xlsx]

## Sheet: Sheet1
Supplementary Table 1 Information regarding the 183 sweet maize inbred lines used for genotyping
Name	Provided or bred by	Genotype for GRMZM2G138060	Genotype for GRMZM2G429899
Lvsetianshi-1	Maize research center of Beijing Academy of Agriculture and Forestry Sciences	T:T	AACCATTNCACCAAC:AACCATTNCACCAAC
Lvsetianshi-2	Maize research center of Beijing Academy of Agriculture and Forestry Sciences	T:T	AACCATTNCACCAAC:AACCATTNCACCAAC
710Xcuiwang-1	Maize research center of Beijing Academy of Agriculture and Forestry Sciences	T:T	AACCATTNCACCAAC:AACCATTNCACCAAC
710Xcuiwang-2	Maize research center of Beijing Academy of Agriculture and Forestry Sciences	T:T	AACCATTNCACCAAC:AACCATTNCACCAAC
710Xcuiwang-3	Maize research center of Beijing Academy of Agriculture and Forestry Sciences	T:T	AACCATTNCACCAAC:AACCATTNCACCAAC
Aofulan-1	Maize research center of Beijing Academy of Agriculture and Forestry Sciences	T:T	AACCATTNCACCAAC:AACCATTNCACCAAC
Aofulan-2	Maize research center of Beijing Academy of Agriculture and Forestry Sciences	T:T	AACCATTNCACCAAC:AACCATTNCACCAAC
Aofulan-3	Maize research center of Beijing Academy of Agriculture and Forestry Sciences	T:T	AACCATTNCACCAAC:AACCATTNCACCAAC
Aofulan-4	Maize research center of Beijing Academy of Agriculture and Forestry Sciences	T:T	AACCATTNCACCAAC:AACCATTNCACCAAC
Cuiwang-1	Maize research center of Beijing Academy of Agriculture and Forestry Sciences	T:T	AACCATTNCACCAAC:AACCATTNCACCAAC
Cuiwang-2	Maize research center of Beijing Academy of Agriculture and Forestry Sciences	T:T	AACCATTNCACCAAC:AACCATTNCACCAAC
Cuiwang-3	Maize research center of Beijing Academy of Agriculture and Forestry Sciences	T:T	AACCATTNCACCAAC:AACCATTNCACCAAC
Cuiwang-4	Maize research center of Beijing Academy of Agriculture and Forestry Sciences	T:T	AACCATTNCACCAAC:AACCATTNCACCAAC
GRBCB-1	Maize research center of Beijing Academy of Agriculture and Forestry Sciences	T:T	AACCATTNCACCAAC:AACCATTNCACCAAC
GRBCB-2	Maize research center of Beijing Academy of Agriculture and Forestry Sciences	T:T	AACCATTNCACCAAC:AACCATTNCACCAAC
GRIC0-1	Maize research center of Beijing Academy of Agriculture and Forestry Sciences	T:T	AACCATTNCACCAAC:AACCATTNCACCAAC
GRIC0-2	Maize research center of Beijing Academy of Agriculture and Forestry Sciences	T:T	AACCATTNCACCAAC:AACCATTNCACCAAC
GRB5-1	Maize research center of Beijing Academy of Agriculture and Forestry Sciences	T:T	AACCATTNCACCAAC:AACCATTNCACCAAC
GRB5-2	Maize research center of Beijing Academy of Agriculture and Forestry Sciences	T:T	AACCATTNCACCAAC:AACCATTNCACCAAC
SDC08	Maize research center of Beijing Academy of Agriculture and Forestry Sciences	T:T	AACCATTNCACCAAC:AACCATTNCACCAAC
SDC07-1	Maize research center of Beijing Academy of Agriculture and Forestry Sciences	T:T	AACCATTNCACCAAC:AACCATTNCACCAAC
SDC07-2	Maize research center of Beijing Academy of Agriculture and Forestry Sciences	T:T	AACCATTNCACCAAC:AACCATTNCACCAAC
SDC07-3	Maize research center of Beijing Academy of Agriculture and Forestry Sciences	T:T	AACCATTNCACCAAC:AACCATTNCACCAAC
SDC04-1	Maize research center of Beijing Academy of Agriculture and Forestry Sciences	T:T	AACCATTNCACCAAC:AACCATTNCACCAAC
SDC04-2	Maize research center of Beijing Academy of Agriculture and Forestry Sciences	T:T	AACCATTNCACCAAC:AACCATTNCACCAAC
SDC04-3	Maize research center of Beijing Academy of Agriculture and Forestry Sciences	T:T	AACCATTNCACCAAC:AACCATTNCACCAAC
SDC04-4	Maize research center of Beijing Academy of Agriculture and Forestry Sciences	T:T	AACCATTNCACCAAC:AACCATTNCACCAAC
SDC04-5	Maize research center of Beijing Academy of Agriculture and Forestry Sciences	T:T	AACCATTNCACCAAC:AACCATTNCACCAAC
SDC04-6	Maize research center of Beijing Academy of Agriculture and Forestry Sciences	T:T	AACCATTNCACCAAC:AACCATTNCACCAAC
SDC05-1	Maize research center of Beijing Academy of Agriculture and Forestry Sciences	T:T	AACCATTNCACCAAC:AACCATTNCACCAAC
SDC05-2	Maize research center of Beijing Academy of Agriculture and Forestry Sciences	T:T	AACCATTNCACCAAC:AACCATTNCACCAAC
SDC05-3	Maize research center of Beijing Academy of Agriculture and Forestry Sciences	T:T	AACCATTNCACCAAC:AACCATTNCACCAAC
SDC02-1	Maize research center of Beijing Academy of Agriculture and Forestry Sciences	T:T	AACCATTNCACCAAC:AACCATTNCACCAAC
SDC02-2	Maize research center of Beijing Academy of Agriculture and Forestry Sciences	T:T	AACCATTNCACCAAC:AACCATTNCACCAAC
SDC02-3	Maize research center of Beijing Academy of Agriculture and Forestry Sciences	T:T	AACCATTNCACCAAC:AACCATTNCACCAAC
SDC02-4	Maize research center of Beijing Academy of Agriculture and Forestry Sciences	T:T	AACCATTNCACCAAC:AACCATTNCACCAAC
SH2R67	Maize research center of Beijing Academy of Agriculture and Forestry Sciences	T:T	AACCATTNCACCAAC:AACCATTNCACCAAC
Huangtian	Maize research center of Beijing Academy of Agriculture and Forestry Sciences	T:T	AACCATTNCACCAAC:AACCATTNCACCAAC
T3586L-03-1	Maize research center of Beijing Academy of Agriculture and Forestry Sciences	T:T	AACCATTNCACCAAC:AACCATTNCACCAAC
T3587-2	Maize research center of Beijing Academy of Agriculture and Forestry Sciences	T:T	AACCATTNCACCAAC:AACCATTNCACCAAC
Xiantian100	Maize research center of Beijing Academy of Agriculture and Forestry Sciences	T:T	AACCATTNCACCAAC:AACCATTNCACCAAC
Xiantian90-1	Maize research center of Beijing Academy of Agriculture and Forestry Sciences	T:T	AACCATTNCACCAAC:AACCATTNCACCAAC
Xiantian90-2	Maize research center of Beijing Academy of Agriculture and Forestry Sciences	T:T	AACCATTNCACCAAC:AACCATTNCACCAAC
JinzhongyuF-1	Maize research center of Beijing Academy of Agriculture and Forestry Sciences	T:T	AACCATTNCACCAAC:AACCATTNCACCAAC
JinzhongyuF-2	Maize research center of Beijing Academy of Agriculture and Forestry Sciences	T:T	AACCATTNCACCAAC:AACCATTNCACCAAC
Xiantian80-1	Maize research center of Beijing Academy of Agriculture and Forestry Sciences	T:T	AACCATTNCACCAAC:AACCATTNCACCAAC
Xiantian80-2	Maize research center of Beijing Academy of Agriculture and Forestry Sciences	T:T	AACCATTNCACCAAC:AACCATTNCACCAAC
J10F17D	Maize research center of Beijing Academy of Agriculture and Forestry Sciences	T:T	AACCATTNCACCAAC:AACCATTNCACCAAC
J10F3003	Maize research center of Beijing Academy of Agriculture and Forestry Sciences	T:T	AACCATTNCACCAAC:AACCATTNCACCAAC
Sida206	Maize research center of Beijing Academy of Agriculture and Forestry Sciences	T:T	AACCATTNCACCAAC:AACCATTNCACCAAC
Tawan-1	Maize research center of Beijing Academy of Agriculture and Forestry Sciences	T:T	AACCATTNCACCAAC:AACCATTNCACCAAC
Tawan-2	Maize research center of Beijing Academy of Agriculture and Forestry Sciences	T:T	AACCATTNCACCAAC:AACCATTNCACCAAC
520-15	Maize research center of Beijing Academy of Agriculture and Forestry Sciences	T:T	AACCATTNCACCAAC:AACCATTNCACCAAC
T68W	Maize research center of Beijing Academy of Agriculture and Forestry Sciences	T:T	AACCATTNCACCAAC:AACCATTNCACCAAC
921M	Maize research center of Beijing Academy of Agriculture and Forestry Sciences	T:T	AACCATTNCACCAAC:AACCATTNCACCAAC
DongtianM-1	Maize research center of Beijing Academy of Agriculture and Forestry Sciences	T:T	AACCATTNCACCAAC:AACCATTNCACCAAC
DongtianM-2	Maize research center of Beijing Academy of Agriculture and Forestry Sciences	T:T	AACCATTNCACCAAC:AACCATTNCACCAAC
DongtianF-1	Maize research center of Beijing Academy of Agriculture and Forestry Sciences	T:T	AACCATTNCACCAAC:AACCATTNCACCAAC
DongtianF-2	Maize research center of Beijing Academy of Agriculture and Forestry Sciences	T:T	AACCATTNCACCAAC:AACCATTNCACCAAC
SS8611M	Maize research center of Beijing Academy of Agriculture and Forestry Sciences	T:T	AACCATTNCACCAAC:AACCATTNCACCAAC
Chaobai3329	Maize research center of Beijing Academy of Agriculture and Forestry Sciences	T:T	AACCATTNCACCAAC:AACCATTNCACCAAC
Aofulan-5	Maize research center of Beijing Academy of Agriculture and Forestry Sciences	T:T	AACCATTNCACCAAC:AACCATTNCACCAAC
Aofulan-6	Maize research center of Beijing Academy of Agriculture and Forestry Sciences	T:T	AACCATTNCACCAAC:AACCATTNCACCAAC
SH241	Maize research center of Beijing Academy of Agriculture and Forestry Sciences	T:T	AACCATTNCACCAAC:AACCATTNCACCAAC
Shuangjin11-1	Maize research center of Beijing Academy of Agriculture and Forestry Sciences	T:T	AACCATTNCACCAAC:AACCATTNCACCAAC
Shuangjin11-2	Maize research center of Beijing Academy of Agriculture and Forestry Sciences	T:T	AACCATTNCACCAAC:AACCATTNCACCAAC
J10F-1	Maize research center of Beijing Academy of Agriculture and Forestry Sciences	T:T	AACCATTNCACCAAC:AACCATTNCACCAAC
J10F-2	Maize research center of Beijing Academy of Agriculture and Forestry Sciences	T:T	AACCATTNCACCAAC:AACCATTNCACCAAC
13Y-308-1	Maize research center of Beijing Academy of Agriculture and Forestry Sciences	T:T	AACCATTNCACCAAC:AACCATTNCACCAAC
13Y-308-2	Maize research center of Beijing Academy of Agriculture and Forestry Sciences	T:T	AACCATTNCACCAAC:AACCATTNCACCAAC
Xing-1	Maize research center of Beijing Academy of Agriculture and Forestry Sciences	T:T	AACCATTNCACCAAC:AACCATTNCACCAAC
Xing-2	Maize research center of Beijing Academy of Agriculture and Forestry Sciences	T:T	AACCATTNCACCAAC:AACCATTNCACCAAC
SH251	Maize research center of Beijing Academy of Agriculture and Forestry Sciences	T:T	AACCATTNCACCAAC:AACCATTNCACCAAC
SH251-1	Maize research center of Beijing Academy of Agriculture and Forestry Sciences	T:T	AACCATTNCACCAAC:AACCATTNCACCAAC
SH251-2	Maize research center of Beijing Academy of Agriculture and Forestry Sciences	T:T	AACCATTNCACCAAC:AACCATTNCACCAAC
SH251-3	Maize research center of Beijing Academy of Agriculture and Forestry Sciences	T:T	AACCATTNCACCAAC:AACCATTNCACCAAC
SH251-4	Maize research center of Beijing Academy of Agriculture and Forestry Sciences	T:T	AACCATTNCACCAAC:AACCATTNCACCAAC
SH251-5	Maize research center of Beijing Academy of Agriculture and Forestry Sciences	T:T	AACCATTNCACCAAC:AACCATTNCACCAAC
13D 30168-1	Maize research center of Beijing Academy of Agriculture and Forestry Sciences	T:T	AACCATTNCACCAAC:AACCATTNCACCAAC
13D 30168-2	Maize research center of Beijing Academy of Agriculture and Forestry Sciences	T:T	AACCATTNCACCAAC:AACCATTNCACCAAC
SH251-6	Maize research center of Beijing Academy of Agriculture and Forestry Sciences	T:T	AACCATTNCACCAAC:AACCATTNCACCAAC
SH251-7	Maize research center of Beijing Academy of Agriculture and Forestry Sciences	T:T	AACCATTNCACCAAC:AACCATTNCACCAAC
ShuangsemixianM	Maize research center of Beijing Academy of Agriculture and Forestry Sciences	T:T	AACCATTNCACCAAC:AACCATTNCACCAAC
ShuangsemixianF-1	Maize research center of Beijing Academy of Agriculture and Forestry Sciences	T:T	AACCATTNCACCAAC:AACCATTNCACCAAC
ShuangsemixianF-2	Maize research center of Beijing Academy of Agriculture and Forestry Sciences	T:T	AACCATTNCACCAAC:AACCATTNCACCAAC
903F-1	Maize research center of Beijing Academy of Agriculture and Forestry Sciences	T:T	AACCATTNCACCAAC:AACCATTNCACCAAC
903F-2	Maize research center of Beijing Academy of Agriculture and Forestry Sciences	T:T	AACCATTNCACCAAC:AACCATTNCACCAAC
903M	Maize research center of Beijing Academy of Agriculture and Forestry Sciences	T:T	AACCATTNCACCAAC:AACCATTNCACCAAC
Xiantian5M-1	Maize research center of Beijing Academy of Agriculture and Forestry Sciences	T:T	AACCATTNCACCAAC:AACCATTNCACCAAC
Xiantian5M-2	Maize research center of Beijing Academy of Agriculture and Forestry Sciences	T:T	AACCATTNCACCAAC:AACCATTNCACCAAC
Lvsechaoren-1	Maize research center of Beijing Academy of Agriculture and Forestry Sciences	T:T	AACCATTNCACCAAC:AACCATTNCACCAAC
Lvsechaoren-2	Maize research center of Beijing Academy of Agriculture and Forestry Sciences	T:T	AACCATTNCACCAAC:AACCATTNCACCAAC
BKL-1	Maize research center of Beijing Academy of Agriculture and Forestry Sciences	T:T	AACCATTNCACCAAC:AACCATTNCACCAAC
BKL-2	Maize research center of Beijing Academy of Agriculture and Forestry Sciences	T:T	AACCATTNCACCAAC:AACCATTNCACCAAC
608F-1	Maize research center of Beijing Academy of Agriculture and Forestry Sciences	T:T	AACCATTNCACCAAC:AACCATTNCACCAAC
608F-2	Maize research center of Beijing Academy of Agriculture and Forestry Sciences	T:T	AACCATTNCACCAAC:AACCATTNCACCAAC
Xiantian90M-1	Maize research center of Beijing Academy of Agriculture and Forestry Sciences	T:T	AACCATTNCACCAAC:AACCATTNCACCAAC
Xiantian90M-2	Maize research center of Beijing Academy of Agriculture and Forestry Sciences	T:T	AACCATTNCACCAAC:AACCATTNCACCAAC
Xiantian90M-3	Maize research center of Beijing Academy of Agriculture and Forestry Sciences	T:T	AACCATTNCACCAAC:AACCATTNCACCAAC
4F-1	Maize research center of Beijing Academy of Agriculture and Forestry Sciences	T:T	AACCATTNCACCAAC:AACCATTNCACCAAC
4F-2	Maize research center of Beijing Academy of Agriculture and Forestry Sciences	T:T	AACCATTNCACCAAC:AACCATTNCACCAAC
JinzhongyuM-1	Maize research center of Beijing Academy of Agriculture and Forestry Sciences	T:T	AACCATTNCACCAAC:AACCATTNCACCAAC
JinzhongyuM-2	Maize research center of Beijing Academy of Agriculture and Forestry Sciences	T:T	AACCATTNCACCAAC:AACCATTNCACCAAC
HuabaotianF-1	Maize research center of Beijing Academy of Agriculture and Forestry Sciences	T:T	AACCATTNCACCAAC:AACCATTNCACCAAC
HuabaotianF-2	Maize research center of Beijing Academy of Agriculture and Forestry Sciences	T:T	AACCATTNCACCAAC:AACCATTNCACCAAC
HuabaotianM-1	Maize research center of Beijing Academy of Agriculture and Forestry Sciences	T:T	AACCATTNCACCAAC:AACCATTNCACCAAC
HuabaotianM-2	Maize research center of Beijing Academy of Agriculture and Forestry Sciences	T:T	AACCATTNCACCAAC:AACCATTNCACCAAC
Xiantian5M-3	Maize research center of Beijing Academy of Agriculture and Forestry Sciences	T:T	AACCATTNCACCAAC:AACCATTNCACCAAC
Xiantian5M-4	Maize research center of Beijing Academy of Agriculture and Forestry Sciences	T:T	AACCATTNCACCAAC:AACCATTNCACCAAC
Xiantian5F-1	Maize research center of Beijing Academy of Agriculture and Forestry Sciences	T:T	AACCATTNCACCAAC:AACCATTNCACCAAC
Xiantian5F-2	Maize research center of Beijing Academy of Agriculture and Forestry Sciences	T:T	AACCATTNCACCAAC:AACCATTNCACCAAC
ZXT-M	Maize research center of Beijing Academy of Agriculture and Forestry Sciences	T:T	AACCATTNCACCAAC:AACCATTNCACCAAC
ZXT-F-1	Maize research center of Beijing Academy of Agriculture and Forestry Sciences	T:T	AACCATTNCACCAAC:AACCATTNCACCAAC
ZXT-F-2	Maize research center of Beijing Academy of Agriculture and Forestry Sciences	T:T	AACCATTNCACCAAC:AACCATTNCACCAAC
Xiantian90F-1	Maize research center of Beijing Academy of Agriculture and Forestry Sciences	T:T	AACCATTNCACCAAC:AACCATTNCACCAAC
Xiantian90F-2	Maize research center of Beijing Academy of Agriculture and Forestry Sciences	T:T	AACCATTNCACCAAC:AACCATTNCACCAAC
Xiantian90M-4	Maize research center of Beijing Academy of Agriculture and Forestry Sciences	T:T	AACCATTNCACCAAC:AACCATTNCACCAAC
Xiantian90M-5	Maize research center of Beijing Academy of Agriculture and Forestry Sciences	T:T	AACCATTNCACCAAC:AACCATTNCACCAAC
Xiantian90M-6	Maize research center of Beijing Academy of Agriculture and Forestry Sciences	T:T	AACCATTNCACCAAC:AACCATTNCACCAAC
Xiantian90M-7	Maize research center of Beijing Academy of Agriculture and Forestry Sciences	T:T	AACCATTNCACCAAC:AACCATTNCACCAAC
BKL-3	Maize research center of Beijing Academy of Agriculture and Forestry Sciences	T:T	AACCATTNCACCAAC:AACCATTNCACCAAC
BKL-4	Maize research center of Beijing Academy of Agriculture and Forestry Sciences	T:T	AACCATTNCACCAAC:AACCATTNCACCAAC
18DX134	Maize research center of Beijing Academy of Agriculture and Forestry Sciences	T:T	AACCATTNCACCAAC:AACCATTNCACCAAC
18D1048	Maize research center of Beijing Academy of Agriculture and Forestry Sciences	T:T	AACCATTNCACCAAC:AACCATTNCACCAAC
18D1049	Maize research center of Beijing Academy of Agriculture and Forestry Sciences	T:T	AACCATTNCACCAAC:AACCATTNCACCAAC
18D1056	Maize research center of Beijing Academy of Agriculture and Forestry Sciences	T:T	AACCATTNCACCAAC:AACCATTNCACCAAC
18D1057	Maize research center of Beijing Academy of Agriculture and Forestry Sciences	T:T	AACCATTNCACCAAC:AACCATTNCACCAAC
18D1059	Maize research center of Beijing Academy of Agriculture and Forestry Sciences	T:T	AACCATTNCACCAAC:AACCATTNCACCAAC
18D1060	Maize research center of Beijing Academy of Agriculture and Forestry Sciences	T:T	AACCATTNCACCAAC:AACCATTNCACCAAC
18D1064	Maize research center of Beijing Academy of Agriculture and Forestry Sciences	T:T	AACCATTNCACCAAC:AACCATTNCACCAAC
18D1065	Maize research center of Beijing Academy of Agriculture and Forestry Sciences	T:T	AACCATTNCACCAAC:AACCATTNCACCAAC
18D1066	Maize research center of Beijing Academy of Agriculture and Forestry Sciences	T:T	AACCATTNCACCAAC:AACCATTNCACCAAC
18D1067	Maize research center of Beijing Academy of Agriculture and Forestry Sciences	T:T	AACCATTNCACCAAC:AACCATTNCACCAAC
18D-2	Maize research center of Beijing Academy of Agriculture and Forestry Sciences	T:T	AACCATTNCACCAAC:AACCATTNCACCAAC
18D1082	Maize research center of Beijing Academy of Agriculture and Forestry Sciences	T:T	AACCATTNCACCAAC:AACCATTNCACCAAC
18D1083	Maize research center of Beijing Academy of Agriculture and Forestry Sciences	T:T	AACCATTNCACCAAC:AACCATTNCACCAAC
18D1090	Maize research center of Beijing Academy of Agriculture and Forestry Sciences	T:T	AACCATTNCACCAAC:AACCATTNCACCAAC
18D-HT-1	Maize research center of Beijing Academy of Agriculture and Forestry Sciences	T:T	AACCATTNCACCAAC:AACCATTNCACCAAC
18D-1097	Maize research center of Beijing Academy of Agriculture and Forestry Sciences	T:T	AACCATTNCACCAAC:AACCATTNCACCAAC
18D-1098	Maize research center of Beijing Academy of Agriculture and Forestry Sciences	T:T	AACCATTNCACCAAC:AACCATTNCACCAAC
18D-1099	Maize research center of Beijing Academy of Agriculture and Forestry Sciences	T:T	AACCATTNCACCAAC:AACCATTNCACCAAC
18D-BT-1	Maize research center of Beijing Academy of Agriculture and Forestry Sciences	T:T	AACCATTNCACCAAC:AACCATTNCACCAAC
18D-1100	Maize research center of Beijing Academy of Agriculture and Forestry Sciences	T:T	AACCATTNCACCAAC:AACCATTNCACCAAC
18D-1103	Maize research center of Beijing Academy of Agriculture and Forestry Sciences	T:T	AACCATTNCACCAAC:AACCATTNCACCAAC
18D-1104	Maize research center of Beijing Academy of Agriculture and Forestry Sciences	T:T	AACCATTNCACCAAC:AACCATTNCACCAAC
18D-1106	Maize research center of Beijing Academy of Agriculture and Forestry Sciences	T:T	AACCATTNCACCAAC:AACCATTNCACCAAC
18D-1108	Maize research center of Beijing Academy of Agriculture and Forestry Sciences	T:T	AACCATTNCACCAAC:AACCATTNCACCAAC
18D-HT-2	Maize research center of Beijing Academy of Agriculture and Forestry Sciences	T:T	AACCATTNCACCAAC:AACCATTNCACCAAC
18D-1109	Maize research center of Beijing Academy of Agriculture and Forestry Sciences	T:T	AACCATTNCACCAAC:AACCATTNCACCAAC
18D-1055	Maize research center of Beijing Academy of Agriculture and Forestry Sciences	C:C	AACCATTNCACCAAC:AACCATTNCACCAAC
18D-BT-2	Maize research center of Beijing Academy of Agriculture and Forestry Sciences	C:C	AACCATTNCACCAAC:AACCATTNCACCAAC
H122	Maize research center of Beijing Academy of Agriculture and Forestry Sciences	C:C	AACCATTNCACCAAC:AACCATTNCACCAAC
Huada165	Maize research center of Beijing Academy of Agriculture and Forestry Sciences	C:C	AACCATTNCACCAAC:AACCATTNCACCAAC
H180	Maize research center of Beijing Academy of Agriculture and Forestry Sciences	C:C	AACCATTNCACCAAC:AACCATTNCACCAAC
H227	Maize research center of Beijing Academy of Agriculture and Forestry Sciences	C:C	AACCATTNCACCAAC:AACCATTNCACCAAC
H254	Maize research center of Beijing Academy of Agriculture and Forestry Sciences	C:C	AACCATTNCACCAAC:AACCATTNCACCAAC
H415	Maize research center of Beijing Academy of Agriculture and Forestry Sciences	C:C	AACCATTNCACCAAC:AACCATTNCACCAAC
H491	Maize research center of Beijing Academy of Agriculture and Forestry Sciences	C:C	AACCATTNCACCAAC:AACCATTNCACCAAC
H512	Maize research center of Beijing Academy of Agriculture and Forestry Sciences	C:C	AACCATTNCACCAAC:AACCATTNCACCAAC
H515	Maize research center of Beijing Academy of Agriculture and Forestry Sciences	C:C	AACCATTNCACCAAC:AACCATTNCACCAAC
H517	Maize research center of Beijing Academy of Agriculture and Forestry Sciences	C:C	AACCATTNCACCAAC:AACCATTNCACCAAC
H534	Maize research center of Beijing Academy of Agriculture and Forestry Sciences	C:C	AACCATTNCACCAAC:AACCATTNCACCAAC
H536	Maize research center of Beijing Academy of Agriculture and Forestry Sciences	C:C	AACCATTNCACCAAC:AACCATTNCACCAAC
H548	Maize research center of Beijing Academy of Agriculture and Forestry Sciences	C:C	AACCATTNCACCAAC:AACCATTNCACCAAC
H595	Maize research center of Beijing Academy of Agriculture and Forestry Sciences	C:C	AACCATTNCACCAAC:AACCATTNCACCAAC
H599	Maize research center of Beijing Academy of Agriculture and Forestry Sciences	C:C	AACCATTNCACCAAC:AACCATTNCACCAAC
H600	Maize research center of Beijing Academy of Agriculture and Forestry Sciences	C:C	AACCATTNCACCAAC:AACCATTNCACCAAC
H618	Maize research center of Beijing Academy of Agriculture and Forestry Sciences	C:C	AACCATTNCACCAAC:AACCATTNCACCAAC
HuajianF	Maize research center of Beijing Academy of Agriculture and Forestry Sciences	C:C	AACCATTNCACCAAC:AACCATTNCACCAAC
Canadajiaqiangtian	Maize research center of Beijing Academy of Agriculture and Forestry Sciences	C:C	-:-
T9	Maize research center of Beijing Academy of Agriculture and Forestry Sciences	C:C	-:-
T9-1	Maize research center of Beijing Academy of Agriculture and Forestry Sciences	C:C	-:-
B12-500-1	Maize research center of Beijing Academy of Agriculture and Forestry Sciences	C:C	-:-
B12-500-2	Maize research center of Beijing Academy of Agriculture and Forestry Sciences	C:C	-:-
B12-507-1	Maize research center of Beijing Academy of Agriculture and Forestry Sciences	C:C	-:-
B12-507-2	Maize research center of Beijing Academy of Agriculture and Forestry Sciences	C:C	-:-
Zaoyang-1	Maize research center of Beijing Academy of Agriculture and Forestry Sciences	C:C	-:-
Zaoyang-2	Maize research center of Beijing Academy of Agriculture and Forestry Sciences	C:C	-:-
F101-1	Maize research center of Beijing Academy of Agriculture and Forestry Sciences	C:C	-:-
F101-2	Maize research center of Beijing Academy of Agriculture and Forestry Sciences	C:C	-:-
F101-3	Maize research center of Beijing Academy of Agriculture and Forestry Sciences	C:C	-:-
F101-4	Maize research center of Beijing Academy of Agriculture and Forestry Sciences	C:C	-:-
18D-X132	Maize research center of Beijing Academy of Agriculture and Forestry Sciences	C:C	-:-
