# Supplementary material for: Genetic basis of the oil biosynthesis in ultra-high-oil maize grains with an oil content exceeding 20%
Source: Front Plant Sci. 2023 May 12;14:1168216. doi: 10.3389/fpls.2023.1168216 (PMC10213527; doi:10.3389/fpls.2023.1168216)
Supplement: Supplementary file 2 [file Table_2.xlsx]

## Sheet: Table S4
Supplementary Table 2 Primers used in this study
Usage	Primer name	Sequence (5'->3')
GRMZM2G138060 (su1) DNA amplification	SU550F/SU2091R	SU550F: GAAACGACGGGGATCTAGGC
		SU2091R: ATGGGGAGAGGAAGTGGAGG
	SU2010F/SU3536R	SU2010F: TCACACACTCCACTCGAACG
		SU3536R: TCCTGGGTGTTTTGTCTTGCT
	SU3322F/SU4895R	SU3322F: AGTTTCTCGTTTGCAGGTTCA
		SU4895R: GCAATCCACTATAAATTCACGGACT
	SU4621F/SU6253R	SU4621F: TGAAGGTAATGAGAAAGGCCCA
		SU6253R: CTGATCAGCACAGGTGGAGG
	SU5360F/SU7259R	SU5360F: ACATGATTACGACAGGGACACC
		SU7259R: CTGAAAATATCTTACCTTTCCATTCCAC
	SU7172F/SU8712R	SU7172F: ATGGGATGCAGGAGGTCTCT
		SU8712R: TACCTCCCCACAATTCCAGC
	SU8595F/SU10416R	SU8595F: ACACGATGGATTTACACTGGCT
		SU10416R: ACAACAGAGCAACCCCAACA
GRMZM2G138060 (su1) cDNA amplification	SU2010F/SU10416R	SU2010F: TCACACACTCCACTCGAACG
		SU10416R: ACAACAGAGCAACCCCAACA
GRMZM2G429899 (sh2) DNA amplification	SH286F/SH1715R	SH286F: GGCAATGTTGGTGGTAGTGG
		SH1715R: GGCGGACCCAGGACAAAATA
	SH1569F/SH3020R	SH1569F: CCCCGCCCATTTCTTTGTTC
		SH3020R: TCGACAGACTCATGCAACCA
	SH2478F/SH3940R	SH2478F: TGCAGGCAAACTCTTCTGGA
		SH3940R: TGCAGCAACTCTACCACCAA
	SH3760F/SH5333R	SH3760F: GGTGTATCTAGTAGTTGGAGGAGA
		SH5333R: GTCTGCTGTACCCTGGAACC
	SH5005F/SH6498R	SH5005F: GGCGGGATCAACTTTGCTGA
		SH6498R: AACATCCTCCCAATAGCCCG
	SH6296F/SH7883R	SH6296F: GGTAAGTCTGATCTGTCTGGAGT
		SH7883R: GCCCGAAATTTACCCCTGAG
	SH7646F/SH9414R	SH7646F: GCCATTTCATCCACCCTGCT
		SH9414R: AGCGGCTCTTACCATACCAAG
KASP assay for GRMZM2G138060 (su1)	AlleleX/AlleleY/Common	AlleleX: TTCAAATTACCTCCCCACAATTCCA
		AlleleY: CAAATTACCTCCCCACAATTCCG
		Common: GACAACAGAGATGGGGAAAATCATAATC
KASP assay for GRMZM2G429899 (sh2)	AlleleX/AlleleY/Common1/Common2	AlleleX: TTTGCACCCTCAATAGTTCAACCATT
		AlleleY: GCACCCTCAATAGTTCAACCATC
		Common1: GGGTGGGGTCGGGATACATAAATTT
		Common2: GAGTGAGGGTGCTGTGTGAGATTAA
KASP assay for GRMZM2G176998	AlleleX/AlleleY/Common	AlleleX: GCCACGCGGAGCGTCTCG
		AlleleY: GCCACGCGGAGCGTCTCA
		Common: TCTCCGGCCTTCTCTTCGTCTC
KASP assay for GRMZM2G167438	AlleleX/AlleleY/Common	AlleleX: TCCGTACTTGTCCATGAATGGG
		AlleleY: GAATCCGTACTTGTCCATGAATGGA
		Common: ATCCACCACTACCCGCTCAAGG
KASP assay for GRMZM2G021339	AlleleX/AlleleY/Common	AlleleX: CTGCGGGACGATGGGTCC
		AlleleY: CTGCGGGACGATGGGTCA
		Common: GTCGTCCGACTGGATGCCTCCA
