# Supplementary material for: Genetic basis of the oil biosynthesis in ultra-high-oil maize grains with an oil content exceeding 20%
Source: Front Plant Sci. 2023 May 12;14:1168216. doi: 10.3389/fpls.2023.1168216 (PMC10213527; doi:10.3389/fpls.2023.1168216)
Supplement: Supplementary file 4 [file Table_4.xlsx]

## Sheet: sheet1
Supplementary Table 4 Differentially expressed genes identified in this study
Gene ID (B73 RefGen_V3)	FDR (Huada165 vs HuajianF)	log2FC (Huada165 vs HuajianF)	regulated (Huada165 vs HuajianF)	FDR (SH251 vs Huada165)	log2FC (SH251 vs Huada165)	regulated (SH251 vs Huada165)	FDR (SH251 vs HuajianF)	log2FC (SH251 vs HuajianF)	regulated (SH251 vs HuajianF)	FDR (T9 vs D165)	log2FC (T9 vs D165)	regulated (T9 vs D165)	FDR (T9 vs HuajianF)	log2FC (T9 vs HuajianF)	regulated (T9 vs HuajianF)	Pfam_annotation
AC148152.3_FG005	3.33821e-21	-4.90211	down	2.14305e-10	-1.29131	down	1.31732e-50	-6.37713	down	0.04784	0.771396	normal	1.88222e-09	-4.09703	down	2OG-Fe(II) oxygenase superfamily
AC149475.2_FG002	0.212015	-0.336389	normal	5.39557e-05	0.760587	normal	0.12532	0.409529	normal	6.53601e-12	-0.978451	normal	1.83814e-10	-1.30601	down	HR-like lesion-inducing
AC149810.2_FG008	0.000316773	1.8905	up	--	--	--	0.00110085	1.50395	up	--	--	--	0.000257321	2.61115	up	Protein tyrosine and serine/threonine kinase
AC149818.2_FG001	7.44792e-05	0.74787	normal	0.0265617	-0.387286	normal	0.0207781	0.354404	normal	1.07369e-10	-1.08003	down	0.0648199	-0.322903	normal	Ras family
AC149818.2_FG006	0.27625	0.199582	normal	7.97147e-23	1.58064	up	5.83382e-21	1.76562	up	2.13476e-05	0.639627	normal	8.37873e-07	0.84806	normal	Ubiquitin-conjugating enzyme
AC149828.2_FG002	0.313594	-0.189238	normal	1.3029e-12	1.06135	up	4.3243e-08	0.863654	normal	0.0223499	0.365902	normal	0.305999	0.185658	normal	Proteasome subunit
AC149829.2_FG002	5.01855e-05	1.96994	up	0.270665	0.576179	normal	3.76704e-18	2.69607	up	0.25432	0.748446	normal	8.94899e-09	2.83709	up	--
AC152495.1_FG002	--	--	--	--	--	--	--	--	--	0.00426727	-1.32388	down	4.20244e-14	-5.67354	down	NB-ARC domain
AC152495.1_FG003	1.58715e-12	-2.40953	down	1.91089e-61	4.83158	up	1.82873e-08	2.31954	up	1.04175e-18	2.20155	up	0.537054	-0.255424	normal	NB-ARC domain
AC152495.1_FG010	2.2374e-09	-3.82339	down	0.185146	0.675054	normal	--	--	--	0.0940161	-0.738078	normal	1.69671e-13	-4.82494	down	NB-ARC domain
AC152495.1_FG012	0.0626607	-0.89317	normal	0.00153684	1.10299	up	0.785463	0.163917	normal	1.8214e-10	2.81198	up	--	--	--	Cation transport ATPase (P-type)
AC152495.1_FG017	0.00650747	-1.32784	down	5.72278e-23	6.12695	up	--	--	--	2.57238e-07	1.98637	up	0.386344	0.594916	normal	NB-ARC domain
AC155376.2_FG002	1.52171e-73	-9.63968	down	9.25261e-44	1.80609	up	3.15166e-43	-8.05118	down	4.26994e-114	4.17164	up	6.9981e-15	-6.15658	down	--
AC155376.2_FG004	0.209627	0.440658	normal	0.954066	0.0183238	normal	0.111245	0.455347	normal	5.56432e-08	-1.24248	down	0.00184551	-0.787567	normal	Formin Homology 2 Domain
AC155376.2_FG005	0.699311	-0.0681118	normal	0.0310349	0.245831	normal	0.177079	0.168502	normal	3.55648e-27	1.49737	up	1.33998e-20	1.43975	up	Glycosyl hydrolase family 1
AC155434.2_FG001	1.95963e-05	-1.92259	down	2.49198e-13	3.10391	up	--	--	--	1.976e-05	1.71514	up	0.754147	-0.229676	normal	alpha/beta hydrolase fold
AC159612.1_FG007	0.363918	-0.425552	normal	6.79847e-05	1.9194	up	0.00372826	1.50695	up	0.249618	-0.474566	normal	0.0108444	-0.916387	normal	Glycosyl hydrolases family 17
AC165178.2_FG004	0.111072	-0.558885	normal	0.687031	0.136218	normal	0.150202	-0.436304	normal	0.15383	-0.458793	normal	0.000486555	-1.02321	down	Myb-like DNA-binding domain
AC166636.1_FG007	--	--	--	--	--	--	--	--	--	6.82697e-06	-2.36462	down	0.00033091	-2.44779	down	WW domain
AC166636.1_FG008	2.00006e-05	-1.52346	down	4.99572e-49	4.41868	up	1.03605e-07	2.69138	up	0.000320926	0.729039	normal	0.0421091	-0.822308	normal	Ras family
AC177838.2_FG015	0.00920601	-1.22124	down	0.585543	0.153603	normal	0.0147179	-1.09374	normal	0.782613	-0.0880753	normal	0.00279072	-1.33633	down	--
AC177850.2_FG003	0.00194505	-2.16236	down	0.0585044	0.888108	normal	--	--	--	0.0979913	1.48427	normal	--	--	--	--
AC177850.2_FG005	0.0250468	0.738847	normal	0.178925	0.558277	normal	0.00031298	1.28911	up	0.642191	-0.245473	normal	0.31795	0.484692	normal	--
AC177897.2_FG002	0.000406071	-1.18836	down	0.00074522	-0.764834	normal	1.59944e-10	-1.95532	down	0.0452909	-0.532348	normal	1.83597e-07	-1.72394	down	SPX domain
AC177899.2_FG009	--	--	--	--	--	--	--	--	--	1.2015e-05	-2.01095	down	0.0209882	-1.84291	normal	PPR repeat family
AC182838.3_FG006	1.99796e-17	-5.68655	down	7.61306e-17	5.43947	up	--	--	--	3.93464e-12	3.74477	up	--	--	--	--
AC183315.4_FG006	--	--	--	--	--	--	--	--	--	0.0182223	-1.26977	normal	0.00219585	-1.84807	down	Armadillo/beta-catenin-like repeat
AC183412.5_FG005	--	--	--	--	--	--	--	--	--	2.74854e-16	-4.32868	down	0.0238366	-2.33797	normal	--
AC183932.3_FG007	0.203627	0.26463	normal	1.16857e-51	-1.85197	down	3.3263e-37	-1.59529	down	0.227202	-0.258804	normal	0.955149	0.0140401	normal	Glycosyltransferase like family 2
AC183938.4_FG011	--	--	--	1.54887e-37	-7.35635	down	2.67413e-42	-4.62613	down	--	--	--	--	--	--	GRF zinc finger
AC184130.4_FG012	0.846564	-0.121883	normal	0.433686	-0.345126	normal	0.375617	-0.467434	normal	2.87661e-05	-1.37528	down	0.000368497	-1.48616	down	--
AC184133.3_FG001	1.01623e-28	6.89068	up	--	--	--	2.48863e-27	6.05294	up	1.74697e-49	-8.43533	down	1.49136e-11	-1.53183	down	cAMP-regulated phosphoprotein/endosulfine conserved region
AC184794.2_FG003	1.65488e-05	-1.69053	down	0.0259147	-0.610483	normal	1.4343e-13	-2.33774	down	0.00166227	-1.01062	down	5.82071e-13	-2.72361	down	POT family
AC184836.3_FG002	1.42738e-14	-5.32488	down	0.0167361	-0.82419	normal	4.05454e-22	-6.28948	down	4.06884e-11	4.35323	up	--	--	--	--
AC185300.4_FG002	1.16261e-05	1.97938	up	0.00384512	-1.39565	down	0.0813808	0.575129	normal	0.00301707	-1.56305	down	0.353647	0.401828	normal	--
AC185588.2_FG002	0.00470803	-2.11345	down	1.84958e-09	4.28498	up	--	--	--	0.00262481	1.92935	up	--	--	--	--
AC186156.3_FG005	--	--	--	--	--	--	--	--	--	1.57296e-13	-4.62031	down	2.27663e-13	-5.31343	down	--
AC186512.3_FG007	3.30825e-05	0.815194	normal	6.88505e-40	7.51982	up	3.91023e-49	8.40048	up	0.00593647	2.36966	up	0.000727931	3.28935	up	--
AC186603.6_FG003	2.60355e-12	-2.22646	down	0.000100914	1.08134	up	0.000825835	-1.16202	down	5.34936e-13	2.31833	up	0.866986	0.0972579	normal	Cytochrome P450
AC186684.4_FG001	--	--	--	--	--	--	--	--	--	6.59212e-10	-4.46205	down	4.41289e-10	-5.26619	down	--
AC186781.4_FG006	--	--	--	9.74567e-13	-3.92462	down	7.43372e-13	-3.88533	down	--	--	--	--	--	--	--
AC187262.4_FG007	0.489551	-0.496203	normal	0.129184	-0.728023	normal	0.00556371	-1.28482	down	0.350633	-0.553818	normal	0.0601406	-1.09853	normal	--
AC187263.4_FG001	5.21204e-13	5.08612	up	9.78873e-20	-5.82559	down	0.0386579	-0.820646	normal	5.84025e-22	-6.30436	down	0.00110103	-1.17716	down	--
AC187885.3_FG002	0.07275	-1.43923	normal	0.0581934	0.97965	normal	--	--	--	1.01405e-05	3.05957	up	--	--	--	--
AC188710.4_FG006	--	--	--	0.058959	-1.53415	normal	1.1031e-19	-6.01969	down	--	--	--	--	--	--	Domain of unknown function (DUF4220)
AC188724.3_FG006	--	--	--	1.00003e-22	-6.13494	down	2.10241e-21	-6.22396	down	--	--	--	--	--	--	--
AC189750.4_FG004	0.0306715	0.484835	normal	2.43071e-18	-1.28299	down	9.73834e-09	-0.806117	normal	3.55042e-11	-1.1549	down	0.000303033	-0.662606	normal	Phosphoadenosine phosphosulfate reductase family
AC190609.3_FG001	--	--	--	--	--	--	--	--	--	1.14893e-08	-4.35501	down	7.21243e-46	-9.26556	down	bZIP transcription factor
AC190609.3_FG003	0.812572	0.103763	normal	0.000206397	1.27594	up	5.62043e-05	1.37617	up	0.921884	-0.0373651	normal	0.817359	0.0749875	normal	Ribosomal protein L30p/L7e
AC190740.2_FG004	5.39048e-14	-3.96872	down	7.5809e-25	6.31196	up	--	--	--	0.0171756	-0.621503	normal	4.61762e-23	-4.81344	down	Sec63 Brl domain
AC190743.3_FG012	0.371616	-0.369509	normal	3.81241e-05	-0.991775	normal	2.67239e-05	-1.35689	down	0.48054	0.271745	normal	0.854224	-0.0933672	normal	--
AC190750.2_FG014	1.62797e-17	1.53336	up	9.82421e-201	-3.43432	down	9.38527e-60	-1.89959	down	1.24616e-23	-1.94737	down	0.0560181	-0.410803	normal	F-box domain
AC190915.3_FG007	0.00403347	-2.0814	down	0.843873	-0.0928722	normal	0.00151041	-2.21037	down	0.615271	-0.253806	normal	0.000776009	-2.49491	down	Zinc finger, C3HC4 type (RING finger)
AC190922.3_FG007	0.00881718	-1.66148	down	0.000832121	1.48578	up	--	--	--	2.4665e-08	3.40194	up	--	--	--	--
AC190999.2_FG004	0.0934154	-0.416121	normal	1.44998e-05	-0.745183	normal	2.75155e-09	-1.1703	down	0.52459	0.162555	normal	0.358216	-0.246565	normal	DNA repair metallo-beta-lactamase
AC191009.3_FG004	0.0230417	0.781302	normal	0.000138909	-1.02998	down	0.458416	-0.248852	normal	0.0019745	-0.929779	normal	0.718091	-0.134945	normal	--
AC191050.3_FG003	0.349849	0.335001	normal	9.22463e-74	6.63092	up	0	7.35814	up	2.48752e-16	3.12583	up	3.25289e-172	3.65891	up	Cupin
AC191147.3_FG002	--	--	--	3.2146e-31	-6.88181	down	2.56219e-31	-5.5522	down	--	--	--	--	--	--	--
AC191534.3_FG003	2.14243e-10	-0.859854	normal	0.0012426	0.30311	normal	2.26979e-05	-0.566821	normal	5.05121e-67	1.93095	up	2.53563e-11	1.07513	up	SAD/SRA domain
AC192362.3_FG002	0.782415	-0.259427	normal	6.14663e-16	5.34959	up	--	--	--	0.352585	0.892175	normal	0.903606	0.123811	normal	--
AC192362.3_FG003	0.61069	-0.147876	normal	6.88681e-06	0.850489	normal	0.00305987	0.689746	normal	1.32272e-12	1.71283	up	2.58244e-08	1.57439	up	Ribosomal protein S12/S23
AC192372.3_FG003	--	--	--	--	--	--	--	--	--	4.23958e-14	-5.35138	down	0.00379571	-1.69835	down	--
AC193499.3_FG004	1.87289e-49	-8.34497	down	0.0612895	-0.279384	normal	9.80246e-53	-8.64285	down	5.29428e-42	4.06842	up	--	--	--	--
AC194402.2_FG003	--	--	--	1.84504e-20	-5.90415	down	3.10755e-19	-5.98846	down	--	--	--	--	--	--	--
AC194425.3_FG005	0.467626	0.254293	normal	9.42628e-18	-1.59193	down	1.52799e-08	-1.33377	down	0.272543	0.364616	normal	0.0645345	0.62886	normal	--
AC194633.3_FG014	4.9038e-16	5.53727	up	--	--	--	0.0573325	0.825989	normal	--	--	--	9.1596e-07	3.79855	up	--
AC194965.4_FG001	0.0513007	-0.524071	normal	8.48116e-05	-0.81267	normal	2.28299e-09	-1.34611	down	0.0254584	-0.553516	normal	2.31546e-05	-1.07475	down	Histidine kinase-, DNA gyrase B-, and HSP90-like ATPase
AC194965.4_FG004	0.00130231	-1.27397	down	0.0164975	0.993885	normal	--	--	--	0.397425	-0.357921	normal	7.22279e-05	-1.64149	down	GATA zinc finger
AC194970.5_FG005	0.00599692	-0.478913	normal	3.21379e-08	0.740319	normal	0.139048	0.250124	normal	3.58532e-22	1.84233	up	2.59678e-09	1.37397	up	Triose-phosphate Transporter family
AC194974.3_FG005	0.000142164	3.08824	up	0.000575624	-2.65261	down	0.00609869	0.90226	normal	2.66705e-05	-3.34429	down	0.881448	-0.0607668	normal	Legume lectin domain
AC194977.2_FG004	7.70322e-12	-4.88587	down	2.38453e-11	4.63713	up	--	--	--	6.42184e-11	4.80044	up	--	--	--	Transketolase, pyrimidine binding domain
AC194980.3_FG002	0.314708	0.532455	normal	0.745171	0.160647	normal	0.112055	0.696605	normal	0.0955078	0.939871	normal	0.0040842	1.52057	up	--
AC195340.3_FG001	0.0404237	0.336163	normal	1.54865e-38	-1.03353	down	1.81802e-08	-0.702231	normal	0.000115243	-0.304631	normal	0.789019	0.0422154	normal	Tubulin/FtsZ family, GTPase domain
AC195587.4_FG004	0.000377019	0.62714	normal	0.00530274	0.421605	normal	7.67996e-10	1.03899	up	0.329165	0.204343	normal	5.35124e-05	0.839403	normal	NB-ARC domain
AC195785.3_FG004	0.625462	0.319795	normal	3.17195e-10	-2.25141	down	2.06602e-10	-1.96139	down	1.62468e-11	-2.59835	down	4.69965e-10	-2.30616	down	Protein kinase domain
AC195794.3_FG002	--	--	--	--	--	--	--	--	--	3.32321e-08	-2.82738	down	6.95248e-13	-5.10134	down	Cupin
AC195806.3_FG001	9.45737e-10	-2.0081	down	0.263467	0.344226	normal	1.04634e-06	-1.67251	down	2.60556e-18	4.51686	up	0.00215024	2.44789	up	--
AC195914.2_FG003	8.2505e-06	2.23713	up	--	--	--	2.08675e-08	3.06975	up	6.86393e-05	-2.04269	down	0.68136	0.210134	normal	--
AC196043.3_FG005	--	--	--	--	--	--	--	--	--	0.00155451	-1.98941	down	0.0503886	-1.37335	normal	--
AC196082.3_FG001	--	--	--	4.22571e-23	-6.23072	down	3.97823e-18	-5.31719	down	--	--	--	--	--	--	--
AC196090.3_FG006	1.42015e-07	1.69297	up	0.133874	0.617135	normal	2.63862e-20	2.35124	up	1.39287e-07	-1.63416	down	0.812462	0.0729534	normal	Subtilase family
AC196110.4_FG004	2.03948e-09	4.44347	up	--	--	--	8.16854e-09	4.3295	up	--	--	--	1.8083e-08	4.88736	up	--
AC196156.3_FG003	0.82472	0.137809	normal	4.91355e-15	-1.63061	down	0.00056338	-1.42438	down	0.000117122	-1.07897	down	0.0585903	-0.901695	normal	NADH-ubiquinone oxidoreductase 11 kDa subunit
AC196394.3_FG002	0.177697	0.557422	normal	4.38279e-13	4.91747	up	3.13637e-16	5.58783	up	1.22276e-12	5.09655	up	3.18835e-15	6.20218	up	--
AC196417.3_FG008	--	--	--	1.35041e-07	-2.58862	down	4.61952e-09	-2.78183	down	0.0060556	-1.78995	down	0.00317234	-2.00133	down	--
AC196465.3_FG006	0.0145126	-0.694445	normal	0.00279089	-0.507097	normal	3.91341e-06	-1.20486	down	0.97337	-0.00981132	normal	0.0320781	-0.69813	normal	HB1, ASXL, restriction endonuclease HTH domain
AC196475.3_FG004	0.670721	-0.174495	normal	0.0644165	0.528721	normal	0.0858924	0.349003	normal	5.94548e-08	1.56826	up	1.04957e-11	1.42732	up	O-methyltransferase domain
AC196502.3_FG003	1.56371e-05	-3.52164	down	0.00253984	0.590442	normal	5.17678e-05	-3.33184	down	3.21041e-07	-0.899983	normal	9.75831e-08	-4.87687	down	Coiled-coil regions of plant-specific actin-binding protein
AC196708.3_FG006	2.78645e-08	-3.55902	down	1.4229e-05	1.93699	up	--	--	--	9.59034e-10	3.21174	up	--	--	--	Auxin responsive protein
AC196961.2_FG003	0.910463	0.0710611	normal	0.00242754	1.11757	up	0.0176039	1.1463	normal	0.625598	-0.190359	normal	0.843643	-0.10848	normal	Centromere kinetochore component CENP-T histone fold
AC197029.3_FG003	0.406063	0.591347	normal	4.63089e-09	-2.26118	down	0.00218269	-1.56069	down	--	--	--	0.289621	0.811517	normal	Protein kinase domain
AC197355.3_FG001	0.472833	0.272299	normal	2.045e-07	2.44091	up	2.84804e-08	2.70043	up	0.00109771	1.41913	up	5.48577e-05	1.72786	up	--
AC197377.3_FG004	--	--	--	5.19737e-08	-2.34205	down	1.59993e-10	-3.17877	down	--	--	--	--	--	--	--
AC197387.3_FG004	4.40231e-14	-2.59992	down	9.51194e-34	5.95767	up	--	--	--	1.13986e-19	3.41903	up	--	--	--	--
AC197555.3_FG008	1.0715e-06	-1.57618	down	4.37687e-32	6.94526	up	3.62992e-15	5.4482	up	8.22922e-32	4.87877	up	5.30888e-08	3.25263	up	Ribose/Galactose Isomerase
AC197705.4_FG001	1.61477e-79	2.76078	up	5.28865e-129	-2.555	down	0.0170554	0.207468	normal	0.000293823	0.618236	normal	8.32058e-204	3.40508	up	Thiamine pyrophosphate enzyme, N-terminal TPP binding domain
AC197705.4_FG003	0.167573	0.596363	normal	0.121363	0.769233	normal	0.00318313	1.35641	up	0.00135948	-1.23048	down	0.11685	-0.635826	normal	Phosphatidylethanolamine-binding protein
AC197717.3_FG002	4.0352e-05	0.631966	normal	3.90447e-21	0.827789	normal	2.66941e-25	1.44753	up	1.55398e-25	0.946796	normal	7.85887e-30	1.58668	up	Ethylene-responsive binding factor-associated repression
AC198019.2_FG004	2.81417e-24	6.48162	up	--	--	--	3.06992e-22	5.81763	up	3.96313e-28	-6.89745	down	0.322898	-0.336536	normal	--
AC198169.4_FG004	0.723756	-0.0652013	normal	1.6443e-19	-1.00673	down	3.94022e-17	-1.08011	down	5.3064e-24	-1.23807	down	4.48252e-19	-1.29513	down	DEAD/DEAH box helicase
AC198324.3_FG003	--	--	--	--	--	--	--	--	--	3.84613e-09	-3.11926	down	2.50424e-09	-3.93993	down	--
AC198366.3_FG004	0.00844313	1.35333	up	--	--	--	0.00209342	1.52954	up	--	--	--	0.0123663	1.32076	normal	GRAS domain family
AC198515.3_FG011	1.99837e-39	7.75435	up	--	--	--	2.04852e-36	7.5897	up	--	--	--	1.0373e-32	8.24231	up	OPT oligopeptide transporter protein
AC199198.3_FG002	--	--	--	6.23357e-17	-5.47784	down	2.5626e-16	-5.59932	down	--	--	--	--	--	--	--
AC199315.4_FG001	0.00281806	0.603908	normal	0.0175813	-0.278072	normal	0.0977202	0.320127	normal	0.000462595	0.509766	normal	1.07074e-08	1.12176	up	Sec61beta family
AC199370.4_FG006	--	--	--	7.35878e-06	-2.35281	down	1.49673e-08	-3.2485	down	--	--	--	--	--	--	--
AC199384.3_FG002	0.202191	0.371258	normal	0.018015	0.687752	normal	0.000221772	1.05042	up	1.4958e-05	1.44292	up	5.86131e-09	1.84307	up	--
AC199541.4_FG001	2.78077e-05	1.83483	up	--	--	--	6.66014e-10	2.77377	up	0.0324247	-1.14955	normal	0.0879715	0.685563	normal	UDP-glucoronosyl and UDP-glucosyl transferase
AC199541.4_FG007	0.00423306	1.49547	up	--	--	--	0.000434286	1.63702	up	0.0778191	-1.00233	normal	0.249297	0.527104	normal	UDP-glucoronosyl and UDP-glucosyl transferase
AC199571.3_FG003	4.05434e-29	4.11956	up	--	--	--	1.70624e-26	4.22543	up	--	--	--	4.27262e-05	3.17012	up	--
AC199571.3_FG004	1.73431e-31	7.24917	up	--	--	--	2.4451e-29	7.10507	up	--	--	--	2.81205e-27	7.80068	up	Thioredoxin
AC199765.4_FG008	1.51907e-07	0.652592	normal	0.000310798	-0.398522	normal	0.0414832	0.245299	normal	4.87755e-39	-1.28461	down	9.1192e-09	-0.623022	normal	Glycosyl hydrolase family 9
AC199820.4_FG006	1.81374e-05	-1.97009	down	0.350981	0.407816	normal	0.00190098	-1.55664	down	4.77103e-05	-1.38789	down	4.29847e-17	-3.42198	down	Myb-like DNA-binding domain
AC200057.4_FG007	0.173809	0.322209	normal	0.000253089	-0.437241	normal	0.604779	-0.119568	normal	4.04462e-06	0.746669	normal	1.04528e-06	1.07498	up	bZIP transcription factor
AC200622.3_FG005	0.0232587	-0.92212	normal	9.80484e-05	1.41036	up	0.365792	0.465538	normal	6.38848e-09	2.7572	up	0.0032028	1.84616	up	--
AC200753.3_FG003	0.0382503	-1.05221	normal	1.09649e-09	2.83629	up	2.68232e-05	1.84328	up	1.80566e-06	2.23976	up	0.00591515	1.2383	up	Plant phosphoribosyltransferase C-terminal
AC200754.4_FG004	--	--	--	--	--	--	--	--	--	6.79279e-13	-5.14305	down	4.78507e-12	-5.64487	down	--
AC202185.4_FG004	1.0997e-05	1.34672	up	0.746146	0.145162	normal	5.15043e-07	1.48962	up	0.0852429	-0.702802	normal	0.0609634	0.642719	normal	Hsp20/alpha crystallin family
AC202435.3_FG003	5.89192e-08	-2.00632	down	0.173118	1.13855	normal	0.706922	0.371098	normal	6.49243e-11	2.44173	up	0.490221	0.438129	normal	Calcineurin-like phosphoesterase
AC202439.3_FG006	--	--	--	--	--	--	--	--	--	1.05362e-196	-6.09853	down	3.12034e-148	-6.67638	down	Sodium:solute symporter family
AC202549.3_FG008	0.0231408	-1.34097	normal	4.72455e-11	4.59269	up	--	--	--	0.033238	-0.927561	normal	2.8256e-06	-2.34798	down	--
AC202567.4_FG004	--	--	--	1.17696e-37	-4.59307	down	1.01702e-33	-6.17577	down	1.16402e-38	-4.78454	down	1.48716e-32	-6.55155	down	--
AC202864.3_FG002	0.445192	-0.417315	normal	0.0017063	1.47151	up	0.044889	1.04853	normal	0.625911	0.294308	normal	0.878811	-0.107937	normal	GATA zinc finger
AC203148.3_FG005	--	--	--	1.51096e-22	-6.11193	down	2.50966e-21	-6.20787	down	--	--	--	--	--	--	--
AC203535.4_FG002	0.562337	0.186931	normal	0.478395	0.126642	normal	0.217886	0.304049	normal	1.57935e-07	0.935902	normal	2.37995e-06	1.12923	up	No apical meristem (NAM) protein
AC203754.4_FG008	0.702943	0.107166	normal	5.78815e-16	1.58147	up	6.66358e-14	1.67546	up	1.34358e-08	1.10576	up	2.09771e-08	1.2225	up	Amino acid kinase family
AC203862.4_FG001	0.000127653	-1.70152	down	2.57208e-06	1.93287	up	--	--	--	0.0370235	1.00468	normal	0.312428	-0.669124	normal	Peptidase C13 family
AC203862.4_FG002	0.301604	0.196112	normal	6.35373e-37	-1.50501	down	1.01083e-21	-1.3154	down	0.163145	-0.25782	normal	0.812764	-0.0532461	normal	PWWP domain
AC203865.3_FG001	0.128377	-0.44868	normal	5.50334e-14	-1.23132	down	2.81776e-16	-1.68705	down	0.402332	0.271328	normal	0.671213	-0.168009	normal	Tesmin/TSO1-like CXC domain, cysteine-rich domain
AC203966.5_FG002	--	--	--	--	--	--	--	--	--	6.50708e-12	-4.99893	down	5.52426e-11	-5.47418	down	--
AC203966.5_FG005	0.0633871	0.879542	normal	0.800776	-0.11699	normal	0.0365427	0.776693	normal	0.640577	0.249391	normal	0.00371438	1.17558	up	2OG-Fe(II) oxygenase superfamily
AC203972.3_FG001	0.0518189	0.948284	normal	0.055766	-0.960749	normal	0.933753	-0.0435322	normal	6.11561e-16	-3.07021	down	1.21812e-08	-2.1358	down	NB-ARC domain
AC203985.4_FG001	0.452145	-0.26661	normal	1.97723e-05	-1.79719	down	1.29492e-15	-2.16935	down	0.0378835	-0.856195	normal	2.09743e-05	-1.15116	down	Major Facilitator Superfamily
AC203989.4_FG001	0.000381616	0.708961	normal	1.44711e-21	-1.02104	down	0.0897553	-0.312792	normal	1.7261e-11	-0.865415	normal	0.514698	-0.142342	normal	PCO_ADO
AC204050.4_FG006	--	--	--	--	--	--	--	--	--	9.81293e-07	-2.55168	down	0.205369	-0.746512	normal	Protein kinase domain
AC204381.3_FG001	1.53022e-05	-2.49377	down	0.000300725	1.77612	up	--	--	--	0.000945291	1.93491	up	--	--	--	--
AC204530.4_FG003	--	--	--	6.97319e-19	-3.7894	down	0.0035091	-2.43839	down	--	--	--	--	--	--	Annexin
AC204539.4_FG001	--	--	--	--	--	--	--	--	--	0.00285636	-1.93112	down	0.0915145	-1.02002	normal	--
AC204539.4_FG002	0.156849	0.893685	normal	0.850798	0.12122	normal	0.0977202	1.00695	normal	0.0080195	-1.25694	down	0.633199	-0.302522	normal	--
AC204539.4_FG003	0.00694038	1.17897	up	3.60803e-15	5.21865	up	2.26941e-21	6.2963	up	1.07936e-08	3.09712	up	1.71886e-16	4.40292	up	Profilin
AC204711.3_FG002	7.27679e-49	2.38497	up	0.473713	-0.15022	normal	3.36795e-57	2.2318	up	7.42452e-51	-2.09209	down	0.0306853	0.309501	normal	Glycosyl hydrolase family 10
AC204711.3_FG003	0.00159854	0.708295	normal	1.37349e-20	1.00254	up	4.68159e-16	1.6911	up	0.00184659	0.331425	normal	4.17758e-07	1.04939	up	Rhodanese-like domain
AC205033.4_FG004	5.17474e-21	5.92563	up	--	--	--	1.06829e-19	6.04378	up	3.85116e-41	-7.55918	down	4.41746e-07	-1.502	down	--
AC205035.3_FG004	5.7625e-44	8.00313	up	3.21989e-39	-7.48351	down	0.0162103	0.471169	normal	3.36602e-40	-7.83285	down	0.240959	0.237503	normal	--
AC205057.3_FG002	0.213847	0.508502	normal	0.564916	0.218382	normal	0.00598764	0.735766	normal	0.00561738	1.12785	up	2.91317e-07	1.68919	up	Plant protein of unknown function (DUF868)
AC205057.3_FG004	0.000301553	2.81939	up	2.46423e-21	-2.96665	down	0.34266	0.796783	normal	2.19312e-40	-5.61503	down	0.0942337	-1.45633	normal	Replication protein A OB domain
AC205077.3_FG003	5.65233e-39	-4.1296	down	0.0479268	-0.378183	normal	1.35666e-80	-4.59375	down	0.150147	0.357377	normal	8.25175e-34	-3.82835	down	--
AC205320.3_FG004	0.0871354	1.03753	normal	--	--	--	2.52358e-05	1.78853	up	0.246069	-0.747711	normal	0.573187	0.311693	normal	GCK domain
AC205376.4_FG008	0.215148	0.645704	normal	0.000788503	1.95839	up	1.97863e-05	2.55439	up	0.34392	0.560357	normal	0.0313984	1.22861	normal	No apical meristem-associated C-terminal domain
AC205413.4_FG001	--	--	--	--	--	--	--	--	--	0.0119435	-1.55322	normal	6.71304e-09	-4.5585	down	Peroxidase
AC205413.4_FG003	--	--	--	--	--	--	--	--	--	0.0027692	-1.57285	down	1.6473e-10	-3.76671	down	Peroxidase
AC205419.3_FG001	0.0696819	0.277745	normal	0.272491	0.104835	normal	0.00269586	0.373863	normal	4.67564e-20	0.782709	normal	2.45408e-19	1.06927	up	Filament-like plant protein, long coiled-coil
AC205471.4_FG007	0.718475	0.257253	normal	0.0286926	1.18274	normal	9.53402e-15	1.60789	up	0.72792	0.234678	normal	0.0136605	0.558819	normal	Senescence regulator
AC205500.3_FG002	--	--	--	1.15418e-13	-5.0344	down	3.18585e-13	-5.16019	down	--	--	--	--	--	--	PPR repeat family
AC205513.3_FG003	4.51941e-18	-5.1877	down	2.55399e-06	1.7874	up	--	--	--	0.00915066	-0.782453	normal	2.44737e-24	-6.30642	down	--
AC205567.3_FG002	--	--	--	--	--	--	--	--	--	3.9975e-28	-6.90012	down	7.26553e-24	-7.31176	down	--
AC205703.4_FG006	1.91139e-08	1.06614	up	0.00327451	-0.545208	normal	0.0122972	0.510702	normal	4.82663e-11	-1.05933	down	0.935691	0.0188163	normal	short chain dehydrogenase
AC205703.4_FG010	0.000532317	-1.28674	down	1.73789e-07	0.640545	normal	0.0777039	-0.684677	normal	2.13985e-08	-0.636979	normal	0.000444836	-1.8401	down	--
AC205725.3_FG010	8.56135e-63	8.19962	up	1.27946e-72	-8.35359	down	0.441672	-0.151797	normal	--	--	--	9.2735e-57	8.30473	up	Noc2p family
AC205886.3_FG001	--	--	--	--	--	--	--	--	--	2.72291e-63	-9.22814	down	4.0936e-50	-9.58478	down	Ribosomal family S4e
AC205888.4_FG004	0.00505489	-1.36522	down	0.0194518	1.05842	normal	--	--	--	0.470713	0.427625	normal	0.188005	-0.901931	normal	Zinc knuckle
AC205982.3_FG014	1.08692e-22	6.32642	up	1.03178e-13	-5.05202	down	0.00495175	1.12499	up	5.85974e-15	-5.45306	down	0.0176083	0.897335	normal	--
AC206165.3_FG007	--	--	--	0.0670956	-0.884302	normal	0.00016917	-2.05561	down	--	--	--	--	--	--	HSF-type DNA-binding
AC206165.3_FG019	--	--	--	0.582053	0.326555	normal	--	--	--	6.23941e-05	-1.54436	down	1.17759e-14	-3.71083	down	--
AC206201.3_FG004	3.52531e-05	1.07081	up	1.0678e-24	-1.98627	down	1.00263e-07	-0.919874	normal	0.624175	-0.17937	normal	0.000158566	0.907574	normal	chorismate binding enzyme
AC206223.3_FG004	5.81755e-07	2.76662	up	0.777612	-0.211814	normal	3.54737e-14	2.75892	up	--	--	--	4.98068e-25	4.68071	up	CRAL/TRIO domain
AC206223.3_FG008	0.233605	0.797019	normal	0.311066	-0.63749	normal	0.761878	0.158349	normal	0.00670736	-1.50295	down	0.0801651	-0.729312	normal	Tetratricopeptide repeat
AC206266.3_FG001	0.0118677	-1.07538	normal	0.0695859	0.617309	normal	0.273809	-0.481945	normal	0.0040049	-0.84798	normal	1.17013e-08	-1.95116	down	ABC transporter transmembrane region
AC206425.3_FG002	0.0330772	0.38729	normal	2.54999e-80	3.43257	up	2.07361e-81	3.80401	up	0.105479	0.267119	normal	0.00018878	0.6633	normal	--
AC206788.3_FG015	0.000146702	-1.21295	down	1.87108e-12	1.8781	up	0.054648	0.641802	normal	0.0126346	0.808562	normal	0.340097	-0.399025	normal	UDP-glucoronosyl and UDP-glucosyl transferase
AC206901.3_FG005	1.40902e-05	1.56598	up	0.805849	-0.129054	normal	1.9319e-05	1.43631	up	0.000195263	-1.43418	down	0.71906	0.134173	normal	Myb-like DNA-binding domain
AC206941.2_FG002	0.597196	-0.482693	normal	0.0150208	1.76191	normal	6.34092e-12	1.71022	up	0.970981	-0.0361016	normal	0.236931	-0.663666	normal	Oleosin
AC206980.3_FG007	1.00271e-07	-2.82657	down	2.99864e-08	2.90634	up	--	--	--	7.61099e-09	3.24767	up	--	--	--	--
AC207225.3_FG003	0.39533	-0.496118	normal	0.00228394	1.20365	up	0.308488	0.634084	normal	0.0793972	0.697341	normal	0.798447	0.176828	normal	--
AC207260.3_FG003	1.08491e-07	-2.47653	down	5.78304e-07	2.65134	up	--	--	--	5.23122e-05	1.99578	up	--	--	--	--
AC207328.3_FG003	0.0229932	-1.15693	normal	0.00129025	1.63903	up	--	--	--	0.0163055	1.38095	normal	--	--	--	--
AC207342.3_FG008	0.0768158	-0.462994	normal	1.26662e-07	1.14801	up	0.000971297	0.677931	normal	0.150921	-0.331424	normal	6.57473e-05	-0.794725	normal	Development and cell death domain
AC207628.4_FG009	1.5701e-12	-1.20848	down	3.41835e-22	1.17704	up	0.837606	-0.0463763	normal	0.0353511	0.286196	normal	4.37238e-07	-0.918393	normal	Endonuclease/Exonuclease/phosphatase family
AC207656.3_FG002	0.0978133	-0.360439	normal	0.0486426	-0.294054	normal	7.24963e-06	-0.665986	normal	3.94237e-09	1.0059	up	0.000504587	0.653103	normal	Auxin response factor
AC207728.2_FG003	0.000344676	1.48224	up	0.00163308	-1.41676	down	0.960713	0.0228698	normal	0.180681	-0.772811	normal	0.100336	0.696557	normal	Component of IIS longevity pathway SMK-1
AC207756.3_FG001	0.173737	-0.620191	normal	2.02456e-16	5.38515	up	6.53245e-11	4.76602	up	0.117844	-0.578178	normal	0.00464961	-1.2008	down	--
AC207890.3_FG002	4.19452e-05	-0.588237	normal	1.37679e-14	-0.494316	normal	3.29083e-19	-1.09054	down	0.737793	0.027956	normal	1.28934e-05	-0.553503	normal	Staphylococcal nuclease homologue
AC208031.3_FG002	--	--	--	--	--	--	0.867275	-0.122886	normal	0.000840136	-1.88924	down	0.075995	-1.00938	normal	--
AC208126.3_FG001	--	--	--	4.02079e-16	-5.41945	down	7.82287e-15	-5.46183	down	1.62027e-19	-6.03716	down	3.05445e-17	-6.4851	down	Gamma-thionin family
AC208201.3_FG002	0.0349784	0.578249	normal	0.015222	-0.5999	normal	0.911844	-0.0300695	normal	9.07063e-33	-2.2313	down	3.35257e-19	-1.64597	down	Protein phosphatase 2C
AC208221.3_FG002	1.14156e-08	2.66243	up	1.25402e-119	-6.30627	down	4.13465e-90	-3.56677	down	1.20427e-79	-5.70492	down	4.75664e-43	-2.95663	down	Bowman-Birk serine protease inhibitor family
AC208327.4_FG002	8.52354e-08	3.43102	up	--	--	--	1.2971e-08	3.848	up	--	--	--	0.169457	0.805361	normal	--
AC208337.2_FG003	3.60219e-26	5.92575	up	4.10408e-48	-7.19394	down	6.41429e-11	-1.30933	down	4.94479e-31	-6.38904	down	0.117	-0.459942	normal	Ribosomal protein S12/S23
AC208338.3_FG010	1.31534e-10	-4.13981	down	4.10696e-16	5.35678	up	--	--	--	4.78674e-10	3.99207	up	--	--	--	--
AC208436.3_FG007	0.0182556	-0.923988	normal	0.0114874	0.75476	normal	0.669016	-0.192023	normal	0.643867	-0.161688	normal	0.00369617	-1.09203	down	Agenet domain
AC208539.3_FG002	0.814659	0.102544	normal	9.70983e-07	-1.31362	down	5.32716e-07	-1.22947	down	0.279738	0.453125	normal	0.105642	0.575457	normal	--
AC208897.3_FG003	--	--	--	2.5659e-25	-5.90577	down	3.63108e-12	-3.81273	down	--	--	--	--	--	--	--
AC208897.3_FG004	0.000662572	-2.81749	down	4.37245e-07	1.2905	up	1.96696e-05	-2.94068	down	0.079621	0.542956	normal	1.31058e-08	-3.87872	down	Sugar (and other) transporter
AC208916.3_FG003	0.256838	0.591644	normal	--	--	--	0.00153097	2.15929	up	--	--	--	0.0077034	1.54756	up	--
AC209080.3_FG004	0.0143597	-1.48191	normal	0.859918	-0.102294	normal	3.1517e-05	-1.72833	down	0.320613	-0.537695	normal	1.69228e-08	-2.21303	down	--
AC209206.3_FG014	1.9856e-42	-2.13383	down	8.08094e-35	1.64577	up	0.00442843	-0.500501	normal	1.48968e-07	0.675138	normal	1.79851e-22	-1.45883	down	Protein of unknown function (DUF_B2219)
AC209213.4_FG002	0.000219955	-1.35436	down	0.0420329	0.586705	normal	0.042856	-0.787751	normal	0.0139589	0.905239	normal	0.403855	-0.44059	normal	--
AC209215.4_FG006	2.27296e-17	4.18393	up	--	--	--	2.6174e-18	5.83534	up	--	--	--	6.31056e-17	6.43934	up	Plectin/S10 domain
AC209257.4_FG008	0.642506	0.303291	normal	0.0313741	1.20576	normal	0.000780513	1.5766	up	0.878241	-0.106488	normal	0.715592	0.211736	normal	PRA1 family protein
AC209710.4_FG002	1.41808e-27	-6.7553	down	3.41159e-27	6.52438	up	--	--	--	2.33572e-26	5.70989	up	--	--	--	rRNA biogenesis protein RRP36
AC209738.3_FG005	--	--	--	--	--	--	--	--	--	2.8981e-19	-2.98921	down	1.89382e-24	-7.36867	down	--
AC209784.3_FG007	1.02089e-09	-0.909385	normal	0.000314033	0.374223	normal	0.000179505	-0.546696	normal	1.2694e-32	-1.03789	down	2.1913e-51	-1.94064	down	Hsp70 protein
AC209784.3_FG011	0.000100135	-1.15925	down	0.00091773	0.916036	normal	0.531922	-0.249611	normal	5.66428e-05	1.27026	up	0.807163	0.121862	normal	Myb/SANT-like DNA-binding domain
AC209819.3_FG005	--	--	--	0.0016926	-2.06877	down	0.633663	-0.257656	normal	--	--	--	--	--	--	O-methyltransferase domain
AC209819.3_FG012	3.41454e-21	2.14723	up	1.34092e-16	-1.86904	down	0.213647	0.26888	normal	0.00240226	-0.903482	normal	1.08314e-09	1.2548	up	Ras family
AC209987.4_FG002	0.00508913	1.60465	up	0.00303238	-1.56861	down	0.935322	0.0370205	normal	0.0610883	-1.14674	normal	0.25771	0.496366	normal	Cytochrome P450
AC209987.4_FG010	0.538714	0.439067	normal	0.0637188	1.12055	normal	0.00157524	1.64191	up	0.00578137	-1.84168	down	2.40389e-05	-1.66513	down	Plastocyanin-like domain
AC210003.2_FG004	1.24232e-11	1.02106	up	1.62217e-05	0.503039	normal	2.21375e-24	1.51348	up	1.06348e-05	0.54454	normal	1.42177e-25	1.57561	up	Peroxidase
AC210013.4_FG003	5.12852e-12	-1.28459	down	3.48022e-30	2.25825	up	0.000174321	0.961722	normal	0.234466	-0.238422	normal	2.33052e-13	-1.51722	down	Sterol methyltransferase C-terminal
AC210013.4_FG009	5.62512e-06	1.65502	up	0.927545	-0.0511434	normal	4.73919e-05	1.58247	up	0.381025	-0.436789	normal	6.19903e-05	1.25299	up	--
AC210013.4_FG014	0.000344284	-0.752186	normal	6.7428e-11	1.30809	up	0.0268851	0.547351	normal	1.67869e-13	1.56348	up	0.00139054	0.822773	normal	Protein kinase domain
AC210013.4_FG019	0.00428394	0.6394	normal	4.32206e-09	0.625456	normal	4.04242e-10	1.25009	up	1.58309e-17	-0.874452	normal	0.346952	-0.217464	normal	Ribosomal protein S5, N-terminal domain
AC210050.3_FG006	2.65966e-13	-5.131	down	2.23864e-09	3.64841	up	--	--	--	0.931495	-0.0503191	normal	3.68665e-12	-5.67198	down	--
AC210212.2_FG004	4.82528e-23	-6.33018	down	1.25329e-22	5.85042	up	--	--	--	1.05385e-17	4.01176	up	--	--	--	--
AC210314.3_FG006	3.13553e-08	0.862752	normal	8.00973e-32	-1.24189	down	0.0105617	-0.383081	normal	0.312787	0.197266	normal	2.15799e-08	1.06763	up	Selenoprotein SelK_SelG
AC210517.3_FG003	9.07745e-08	-1.78791	down	3.66828e-17	3.4812	up	0.00610659	1.63117	up	0.898698	0.0467749	normal	2.99133e-08	-1.76514	down	Hsp20/alpha crystallin family
AC210595.3_FG004	4.23175e-15	5.425	up	2.29937e-20	-5.89499	down	0.303887	-0.462015	normal	--	--	--	2.15203e-13	5.91752	up	DREPP plasma membrane polypeptide
AC210669.3_FG001	4.12236e-19	1.49904	up	4.80579e-55	-1.83635	down	0.00521953	-0.339336	normal	5.79764e-17	-1.14648	down	0.0107726	0.367069	normal	Glycosyl hydrolases family 16
AC210727.4_FG002	5.06874e-20	5.99911	up	--	--	--	2.1892e-17	5.09093	up	--	--	--	4.94372e-17	6.44963	up	--
AC210816.3_FG006	0.637176	0.286208	normal	6.71555e-19	-2.5369	down	3.4316e-10	-2.20903	down	0.617993	-0.354791	normal	0.924901	-0.0791499	normal	--
AC211175.3_FG005	6.79169e-15	-1.41876	down	4.26086e-05	0.546166	normal	1.14633e-05	-0.88257	normal	5.00673e-19	1.08509	up	0.121849	-0.334395	normal	Protein tyrosine and serine/threonine kinase
AC211276.4_FG008	4.17598e-06	0.927634	normal	0.218718	-0.242621	normal	2.42544e-07	0.682192	normal	0.303024	0.240681	normal	3.16447e-15	1.18751	up	Core-2/I-Branching enzyme
AC211349.4_FG001	0.83044	-0.0613785	normal	1.31675e-57	5.95456	up	5.99934e-54	5.91626	up	0.131424	0.348867	normal	0.208654	0.297439	normal	tRNA synthetases class II core domain (F)
AC211357.4_FG004	0.389095	-0.228665	normal	9.26832e-09	1.36992	up	2.11654e-06	1.13676	up	0.00046137	-0.711805	normal	2.39611e-06	-0.937284	normal	PCRF domain
AC211390.3_FG001	0.0872272	-0.439438	normal	0.598436	-0.115532	normal	0.0147279	-0.564914	normal	3.9653e-06	-0.8855	normal	3.13472e-09	-1.32109	down	Putative S-adenosyl-L-methionine-dependent methyltransferase
AC211474.3_FG006	--	--	--	4.29235e-56	-8.50366	down	1.19085e-51	-8.56693	down	--	--	--	--	--	--	GDP-fucose protein O-fucosyltransferase
AC211532.3_FG001	0.199535	-0.805669	normal	1.48096e-07	3.33468	up	--	--	--	0.69389	-0.23772	normal	0.110845	-1.05361	normal	--
AC211652.4_FG002	0.623095	-0.277436	normal	2.10576e-07	-1.41014	down	1.16715e-05	-1.66956	down	0.00745021	-0.989083	normal	0.00704664	-1.2588	down	FHA domain
AC211652.4_FG003	0.155225	0.655787	normal	0.0336407	1.20983	normal	0.000558625	1.85604	up	0.241356	0.744183	normal	0.0118803	1.43521	normal	Glycosyl hydrolases family 18
AC211892.4_FG002	6.37347e-24	-2.35917	down	0.399535	0.188304	normal	2.90885e-17	-2.17316	down	0.952139	-0.0186827	normal	2.64318e-16	-2.36724	down	Leucine rich repeat
AC211972.4_FG003	0.00399975	-0.894047	normal	3.99517e-07	1.01524	up	0.807916	0.0949427	normal	8.80271e-23	2.75758	up	6.02394e-06	1.8474	up	--
AC212023.4_FG006	--	--	--	1.43188e-14	-3.96994	down	6.94707e-11	-4.18879	down	--	--	--	--	--	--	--
AC212186.3_FG011	1.02858e-11	4.87204	up	--	--	--	6.53245e-11	4.74745	up	--	--	--	2.1632e-10	5.32429	up	--
AC212219.3_FG005	--	--	--	--	--	--	--	--	--	2.83494e-11	-4.87907	down	1.50515e-10	-5.37287	down	2OG-Fe(II) oxygenase superfamily
AC212227.3_FG006	0.159187	0.454186	normal	3.89542e-06	-1.06814	down	0.00937756	-0.62101	normal	0.423333	0.300125	normal	0.0171834	0.768885	normal	Fibrillarin
AC212351.4_FG001	--	--	--	--	--	--	0.271965	-0.654351	normal	1.87926e-17	-3.72424	down	5.68027e-10	-2.50614	down	--
AC212565.3_FG001	0.444006	0.592363	normal	0.188689	0.857934	normal	8.39985e-10	1.71204	up	0.576077	-0.431044	normal	0.563528	0.207853	normal	Centromere kinetochore component CENP-T histone fold
AC212570.3_FG006	0.161246	0.376359	normal	0.0840787	0.430055	normal	0.000220158	0.801064	normal	3.46248e-07	-1.041	down	0.000850872	-0.65895	normal	UTP15 C terminal
AC212575.3_FG002	0.00201159	-2.1861	down	1.57911e-08	3.3219	up	--	--	--	0.11475	0.910147	normal	--	--	--	--
AC212720.3_FG006	3.06369e-17	5.75156	up	--	--	--	8.43329e-13	4.39969	up	--	--	--	0.0119102	2.56373	normal	--
AC212835.3_FG001	--	--	--	3.07552e-17	-2.91526	down	3.10449e-11	-2.70579	down	7.5458e-06	-1.96434	down	0.000252949	-1.80219	down	PPR repeat family
AC212835.3_FG007	4.52834e-07	0.895357	normal	0.903437	-0.0249128	normal	1.70415e-09	0.864698	normal	0.690465	0.0917567	normal	5.30957e-11	1.00044	up	Endoribonuclease XendoU
AC212835.3_FG010	2.11376e-12	4.81477	up	--	--	--	3.89558e-12	4.97417	up	--	--	--	1.41496e-11	5.57269	up	--
AC212859.3_FG007	0.00622873	-0.765161	normal	6.2531e-24	1.15968	up	0.22815	0.360201	normal	0.989608	-0.00146725	normal	0.00323813	-0.766227	normal	--
AC212859.3_FG008	0.00406381	-2.11729	down	0.028562	1.04902	normal	--	--	--	0.0952971	0.959371	normal	--	--	--	No apical meristem (NAM) protein
AC213099.3_FG001	1.04306e-05	0.786507	normal	1.17318e-22	-1.35134	down	0.000857455	-0.570022	normal	0.0220543	-0.408157	normal	0.0392367	0.388461	normal	Putative zinc- or iron-chelating domain
AC213353.3_FG004	0.00359942	-1.27399	down	1.31973e-37	7.39027	up	1.63497e-18	5.97476	up	5.54358e-05	3.22047	up	2.2651e-06	3.29788	up	--
AC213432.2_FG004	0.00155517	1.51984	up	0.209699	0.708371	normal	1.04279e-10	2.33433	up	0.771399	-0.187861	normal	0.000129995	1.4111	up	Plant invertase/pectin methylesterase inhibitor
AC213463.3_FG002	0.0891232	-0.333217	normal	0.60992	0.0741881	normal	0.151817	-0.269412	normal	4.28672e-13	1.13814	up	9.09426e-05	0.810561	normal	RNA polymerase II transcription elongation factor
AC213521.3_FG005	0.0713193	0.74572	normal	0.625436	0.218911	normal	0.0123551	0.96099	normal	8.13736e-11	-1.90293	down	0.000370729	-1.13861	down	Shikimate / quinate 5-dehydrogenase
AC213612.3_FG002	2.06233e-14	4.657	up	--	--	--	3.02903e-15	5.44111	up	1.54384e-13	-4.63819	down	0.960288	-0.0259567	normal	KOW motif
AC213654.3_FG003	0.0503802	1.05538	normal	--	--	--	5.97404e-05	1.73841	up	--	--	--	4.7447e-07	2.66083	up	--
AC213654.3_FG004	0.289626	0.584341	normal	--	--	--	0.000535321	2.27175	up	--	--	--	0.00686054	1.79846	up	F-box-like
AC214051.3_FG003	1.36788e-12	-5.04126	down	0.737802	-0.172784	normal	1.80049e-14	-5.36468	down	4.4386e-10	4.29343	up	--	--	--	--
AC214146.3_FG007	4.08124e-08	-1.64217	down	0.00644488	0.69136	normal	0.00582201	-0.959244	normal	0.13164	0.482949	normal	0.00358046	-1.14914	down	--
AC214168.3_FG001	2.01971e-06	-1.79546	down	6.76599e-20	5.80493	up	--	--	--	0.0974723	-0.538057	normal	1.94796e-11	-2.36573	down	E2F transcription factor CC-MB domain
AC214267.3_FG004	0.613866	-0.301072	normal	0.00166989	1.69183	up	--	--	--	0.554172	0.361603	normal	0.922582	0.0717528	normal	--
AC214360.3_FG001	2.85951e-71	-5.96228	down	5.14665e-35	2.61442	up	1.18237e-15	-3.35205	down	3.18076e-05	0.860774	normal	5.68452e-49	-5.19695	down	Terpene synthase family, metal binding domain
AC214602.3_FG012	0.0210406	-0.779615	normal	0.000272146	0.694353	normal	0.790625	-0.108974	normal	1.82344e-06	-0.787117	normal	3.38062e-07	-1.55713	down	Leucine rich repeat
AC214635.3_FG002	0.0673699	-0.303766	normal	0.0796159	0.250393	normal	0.741718	-0.062785	normal	1.42247e-11	1.12063	up	1.89021e-05	0.826423	normal	Kelch motif
AC214635.3_FG006	0.645271	-0.215615	normal	3.84657e-19	-1.99002	down	1.54094e-18	-2.21489	down	0.0405996	-0.692975	normal	0.00961071	-0.91166	normal	--
AC214640.3_FG003	6.20494e-06	1.05582	up	0.803588	0.0786791	normal	9.10852e-09	1.13237	up	6.50557e-05	-0.984487	normal	0.748619	0.0784417	normal	Ribosomal protein S15
AC214817.3_FG004	0.849108	-0.0579111	normal	0.430369	0.165001	normal	0.711943	0.0979533	normal	2.78056e-07	1.07829	up	2.14467e-05	1.02955	up	Protein tyrosine and serine/threonine kinase
AC215201.3_FG005	1.06564e-08	1.02917	up	0.618064	-0.105372	normal	7.56223e-08	0.916214	normal	7.32436e-69	-2.15947	down	3.04797e-20	-1.11676	down	TCP-1/cpn60 chaperonin family
AC215201.3_FG008	8.38989e-24	2.99975	up	1.15353e-06	-1.8094	down	1.48436e-05	1.14913	up	1.32853e-08	-2.15871	down	0.00389281	0.817933	normal	--
AC215260.3_FG001	3.07002e-12	3.74715	up	0.000225935	-2.11492	down	2.77002e-06	1.70582	up	3.00029e-09	-3.10891	down	0.0623914	0.765071	normal	Dirigent-like protein
AC215723.3_FG001	0.0276779	-0.973535	normal	2.42756e-06	1.81639	up	0.155046	0.794176	normal	0.453314	0.301634	normal	0.17425	-0.679623	normal	PPR repeat family
AC216870.3_FG005	9.60798e-19	6.04116	up	--	--	--	1.11005e-17	5.9325	up	1.02516e-24	-6.58144	down	0.912205	0.0730361	normal	--
AC217050.4_FG006	1.05921e-34	1.36694	up	3.79277e-34	-0.871962	normal	2.83576e-06	0.48891	normal	0.72424	-0.034033	normal	7.14495e-41	1.34433	up	14-3-3 protein
AC217264.3_FG005	0.0351262	0.731348	normal	1.27751e-19	-2.19694	down	1.11974e-10	-1.47389	down	0.0155468	1.11293	normal	1.12744e-07	1.90393	up	Myb-like DNA-binding domain
AC217286.3_FG004	--	--	--	5.38104e-17	-5.48988	down	2.78135e-16	-5.6019	down	--	--	--	--	--	--	--
AC217358.3_FG007	0.517545	-0.272231	normal	0.00156713	1.03225	up	0.0244949	0.753011	normal	0.959741	0.0203901	normal	0.445432	-0.252135	normal	short chain dehydrogenase
AC217553.3_FG008	0.426734	0.412231	normal	0.0143986	-0.792866	normal	0.425221	-0.36539	normal	1.10431e-06	-1.48655	down	0.0121325	-1.04042	normal	RNA dependent RNA polymerase
AC217840.3_FG001	0.00111574	-0.737885	normal	0.0431418	-0.312141	normal	6.87653e-08	-1.05928	down	0.00040798	0.662067	normal	0.812131	-0.0714708	normal	Domain of unknown function (DUF1990)
AC217975.3_FG001	0.347305	-0.339945	normal	0.000628778	1.21348	up	0.0168084	0.876154	normal	0.00280558	1.07303	up	0.0325654	0.757332	normal	Mitochondrial branched-chain alpha-ketoacid dehydrogenase kinase
AC217977.3_FG003	0.00114975	1.1146	up	0.804031	-0.110775	normal	0.00100285	1.00256	up	0.81432	-0.122626	normal	0.0033555	1.00862	up	Iron-sulphur cluster biosynthesis
AC218035.3_FG001	1.00195e-23	1.18493	up	5.62911e-29	-0.986526	normal	0.0666891	0.192032	normal	0.0505661	0.260957	normal	1.05555e-31	1.45617	up	--
AC218035.3_FG004	0.766911	0.0896397	normal	0.346509	0.138593	normal	0.376203	0.218316	normal	1.324e-15	1.29423	up	3.42443e-09	1.38752	up	Vitamin B6 photo-protection and homoeostasis
AC218093.3_FG005	1.30703e-79	8.88715	up	--	--	--	7.41944e-65	9.40036	up	--	--	--	1.44646e-64	9.57951	up	--
AC218900.3_FG001	8.68981e-14	2.51477	up	0.167334	-0.628453	normal	1.09758e-13	1.89728	up	0.380401	-0.477475	normal	3.70921e-14	2.0781	up	alpha/beta hydrolase fold
AC220927.3_FG007	0.00462129	1.18615	up	0.538669	0.314424	normal	1.12222e-05	1.52842	up	0.465218	-0.35872	normal	0.00373788	0.867733	normal	Phosphate-induced protein 1 conserved region
AC220927.3_FG008	2.12965e-14	5.28984	up	--	--	--	2.35051e-13	5.15476	up	--	--	--	1.48065e-12	5.74105	up	--
AC225147.4_FG002	3.96655e-12	1.60937	up	6.87955e-12	-1.02519	down	0.00504457	0.590473	normal	0.0245643	-0.439791	normal	3.68396e-08	1.19151	up	Ribosomal protein S12/S23
AC225179.3_FG003	2.11145e-26	-6.6599	down	3.74009e-26	6.43764	up	--	--	--	6.16805e-14	3.48869	up	--	--	--	F-box-like
AC225354.2_FG004	0.631167	-0.303513	normal	0.963603	0.023987	normal	0.568082	-0.297388	normal	0.000279061	2.45088	up	--	--	--	--
AC225718.2_FG009	0.0289099	1.20728	normal	0.273731	-0.563111	normal	0.0579256	0.689455	normal	0.796593	0.176086	normal	0.000204394	1.49442	up	Wound-induced protein
AC226227.2_FG005	0.135391	-0.563932	normal	0.884874	0.0415261	normal	0.130888	-0.534207	normal	1.90405e-05	1.3711	up	0.0666192	0.806174	normal	Plant protein of unknown function
AC226235.2_FG001	1.00844e-06	-1.5835	down	3.35862e-13	2.01909	up	0.302322	0.409721	normal	4.31175e-05	1.15626	up	0.256698	-0.437877	normal	NmrA-like family
AC226235.2_FG003	0.946624	-0.0498056	normal	0.000299263	1.89789	up	3.01253e-06	1.95776	up	0.949336	0.0421767	normal	0.988575	-0.00693576	normal	--
AC226723.2_FG001	--	--	--	1.80233e-92	-5.921	down	3.29664e-90	-5.56298	down	1.52678e-64	-5.47019	down	3.1864e-62	-5.13915	down	Malic enzyme, N-terminal domain
AC229875.1_FG002	5.45121e-15	5.22522	up	--	--	--	1.67788e-14	5.37099	up	--	--	--	7.51184e-14	6.00424	up	--
AC230011.2_FG002	0.143349	-1.0206	normal	2.29117e-16	1.28564	up	0.933753	0.0497204	normal	0.601481	0.120566	normal	0.195665	-0.958934	normal	NB-ARC domain
AC230020.1_FG002	0.788572	0.0983001	normal	0.000330795	1.22708	up	6.57385e-05	1.32537	up	0.0121642	0.943978	normal	0.00265035	1.06724	up	--
AC231180.2_FG006	1.93053e-06	1.54441	up	0.291302	-0.434429	normal	0.000342783	1.09992	up	0.252878	0.616623	normal	3.91925e-10	2.21564	up	Glycosyl hydrolases family 28
AC231226.2_FG007	--	--	--	1.33007e-25	-6.40209	down	3.13787e-24	-6.50016	down	--	--	--	--	--	--	--
AC231745.1_FG003	0.0333541	0.596306	normal	0.0375945	0.710429	normal	5.83458e-31	1.33924	up	0.000369569	1.28004	up	1.55999e-36	1.94857	up	GDSL-like Lipase/Acylhydrolase
AC231745.1_FG004	0.000608738	0.475178	normal	6.6758e-56	-1.46906	down	6.02521e-24	-1.00123	down	0.685955	-0.0626922	normal	0.000922921	0.422413	normal	Sulfotransferase family
AC232238.2_FG004	1.01563e-12	-2.29134	down	0.938451	0.0219246	normal	4.0157e-13	-2.28536	down	0.491361	0.232677	normal	4.41155e-08	-2.0614	down	Seed dormancy control
AC232393.1_FG009	0.626456	-0.191157	normal	0.859396	-0.0627105	normal	0.457203	-0.263074	normal	0.00764984	-0.812755	normal	0.00180033	-1.00319	down	PPR repeat family
AC233861.1_FG001	0.00030385	-0.847924	normal	2.73916e-12	1.2996	up	0.116893	0.435399	normal	1.05863e-15	-1.0951	down	3.44311e-23	-1.93903	down	Leucine rich repeat
AC233870.1_FG003	0.00357864	-0.538923	normal	0.141954	-0.188452	normal	2.86718e-06	-0.73649	normal	8.88477e-16	-0.941026	normal	3.00479e-21	-1.47293	down	--
AC233871.1_FG003	0.0133245	-0.679506	normal	0.339445	-0.230396	normal	1.63575e-05	-0.925185	normal	0.00452213	-0.710909	normal	4.14997e-08	-1.39002	down	Protein kinase domain
AC233879.1_FG002	0.113585	-0.910612	normal	0.000614268	1.69676	up	8.58298e-08	0.859042	normal	0.87948	0.0985913	normal	2.1689e-06	-0.903218	normal	Small hydrophilic plant seed protein
AC233880.1_FG009	0.0471656	-0.795375	normal	0.023176	1.83693	normal	0.00732397	1.91136	up	0.000885573	0.972183	normal	0.758146	0.16137	normal	Ribosomal protein S24e
AC233885.1_FG001	2.32524e-07	1.05095	up	1.4136e-14	-1.36837	down	0.118677	-0.323722	normal	0.0708643	-0.399854	normal	0.000547455	0.664308	normal	Zein-binding
AC233887.1_FG005	1.20262e-15	-2.83008	down	0.000650321	1.00251	up	1.56201e-06	-1.84459	down	0.00538053	-0.683559	normal	2.21814e-38	-3.59486	down	Aluminium activated malate transporter
AC233892.1_FG001	0.799245	-0.127992	normal	0.00516219	1.16094	up	0.0116724	1.03873	normal	0.514537	-0.286243	normal	0.309144	-0.412516	normal	PPR repeat
AC233893.1_FG003	0.00493852	1.14211	up	2.49852e-07	-1.75538	down	0.0225681	-0.626415	normal	2.62121e-21	-2.82453	down	4.54709e-12	-1.67884	down	FAE1/Type III polyketide synthase-like protein
AC233893.1_FG006	0.0501667	0.865203	normal	0.419053	0.406699	normal	0.000689919	1.29046	up	0.750646	-0.177736	normal	0.0683704	0.713653	normal	Protein kinase domain
AC233899.1_FG002	0.41475	0.387085	normal	4.96507e-16	-2.19	down	2.82584e-17	-1.82614	down	0.912973	-0.0656454	normal	0.526035	0.330451	normal	Helix-loop-helix DNA-binding domain
AC233901.1_FG004	0.664606	0.128443	normal	0.325375	-0.210994	normal	0.711884	-0.0906971	normal	1.12368e-08	-1.08874	down	7.95945e-06	-0.952141	normal	--
AC233901.1_FG005	0.872824	0.0490986	normal	0.0560094	-0.38643	normal	0.154608	-0.345638	normal	1.9968e-24	-1.6158	down	4.33216e-16	-1.55801	down	La domain
AC233910.1_FG001	0.213203	0.529049	normal	0.0224818	1.12002	normal	0.000450636	1.64241	up	0.651236	-0.230079	normal	0.511919	0.308436	normal	Mitochondrial carrier protein
AC233910.1_FG002	0.0776937	0.977978	normal	--	--	--	9.00299e-05	2.59718	up	--	--	--	0.681834	0.244437	normal	--
AC233936.1_FG003	2.44504e-15	5.42413	up	6.60912e-29	-6.707	down	3.69011e-06	-1.38089	down	3.5406e-23	-6.432	down	0.00299469	-1.00406	down	--
AC233939.1_FG004	6.11293e-06	-1.72011	down	0.0442341	0.50616	normal	0.00236332	-1.23504	down	0.0380671	-0.493036	normal	6.0195e-10	-2.23268	down	Plant protein 1589 of unknown function (A_thal_3526)
AC233942.1_FG001	2.84973e-13	1.47112	up	0.499789	0.203432	normal	6.82025e-18	1.66987	up	0.262577	0.374456	normal	1.19733e-18	1.86676	up	F-box domain
AC233945.1_FG003	6.10408e-05	-1.03625	down	0.00941018	0.59453	normal	0.12961	-0.450971	normal	0.132818	0.400429	normal	0.0436608	-0.629725	normal	MatE
AC233952.1_FG008	0.0380519	-0.885804	normal	4.00077e-05	-1.2326	down	1.74623e-13	-2.15814	down	0.369901	-0.378587	normal	0.000508805	-1.2869	down	C2H2-type zinc finger
AC233953.1_FG004	0.0132822	1.12731	normal	--	--	--	0.00354648	1.34449	up	--	--	--	0.0372721	1.01473	normal	Protein tyrosine and serine/threonine kinase
AC233955.1_FG002	7.92894e-08	2.99474	up	--	--	--	8.15518e-06	2.45126	up	2.5405e-07	-3.05921	down	0.809194	-0.133578	normal	--
AC233955.1_FG009	0.0650768	0.730287	normal	0.248197	0.518275	normal	0.000579987	1.25474	up	0.674269	0.234469	normal	0.0189899	0.988132	normal	GDSL/SGNH-like Acyl-Esterase family found in Pmr5 and Cas1p
AC233960.1_FG002	0.0830805	-0.566097	normal	0.00511339	0.78682	normal	0.626301	0.206376	normal	5.74301e-06	1.16818	up	0.103033	0.601599	normal	Alternative oxidase
AC233960.1_FG003	0.80307	0.107943	normal	6.41724e-10	2.46797	up	1.31744e-09	2.56385	up	0.00117076	-0.883962	normal	0.0113971	-0.769959	normal	MYB-CC type transfactor, LHEQLE motif
AC233966.1_FG001	0.299246	0.192912	normal	0.322674	0.169564	normal	0.0346902	0.353575	normal	2.65504e-15	1.74072	up	4.12865e-18	1.94995	up	Nodulin-like
AC233966.1_FG003	0.484953	0.458739	normal	0.539766	0.364955	normal	0.0225211	0.881241	normal	0.0674129	1.30308	normal	0.00442244	1.88932	up	Nodulin-like
AC233967.1_FG001	5.58674e-07	1.35345	up	6.02999e-07	-1.27265	down	0.808927	0.0732351	normal	0.483026	0.296691	normal	3.21509e-09	1.67479	up	SWIB/MDM2 domain
AC233979.1_FG006	0.899914	0.0532353	normal	4.70256e-10	-1.19841	down	4.42779e-05	-1.13689	down	0.00812015	-0.64412	normal	0.0766727	-0.578761	normal	zinc-finger of the FCS-type, C2-C2
AC234152.1_FG002	0.809875	-0.0553415	normal	0.0213928	0.354495	normal	0.102707	0.289741	normal	3.04928e-43	3.27288	up	1.24651e-35	3.23711	up	Ion transport protein
AC234152.1_FG007	0.0498978	0.943679	normal	0.729042	0.171852	normal	0.00594834	1.12772	up	0.000134743	2.14551	up	6.54556e-11	3.24511	up	Ion transport protein
AC234154.1_FG008	0.177987	0.423221	normal	0.000201524	1.18185	up	2.55231e-07	1.59848	up	0.000193729	-0.986772	normal	0.0590777	-0.555775	normal	Lecithin:cholesterol acyltransferase
AC234160.1_FG003	0.00432897	0.445858	normal	3.69758e-182	3.53169	up	4.15189e-228	3.97148	up	5.79352e-32	1.41375	up	7.35856e-47	1.8702	up	Glycosyl hydrolase family 1
AC234164.1_FG003	1.38676e-10	-4.6656	down	3.99226e-10	4.41622	up	--	--	--	0.966733	0.0282381	normal	--	--	--	--
AC234165.1_FG002	1.32933e-34	-3.41242	down	0.201631	0.244383	normal	6.22757e-37	-3.20397	down	0.70577	0.0873095	normal	2.77094e-38	-3.36535	down	--
AC234175.1_FG010	0.195783	-0.480199	normal	2.69488e-14	1.61803	up	0.00250848	1.08609	up	0.502317	0.167611	normal	0.42092	-0.312927	normal	PPR repeat family
AC234183.1_FG002	3.7936e-29	6.95751	up	2.23972e-26	-6.47923	down	0.124167	0.512317	normal	1.57503e-24	-6.56844	down	0.140842	0.519562	normal	Hsp90 protein
AC234185.1_FG004	0.00442078	-0.728411	normal	0.369735	-0.19382	normal	6.92228e-05	-0.932269	normal	1.1052e-05	-0.958084	normal	7.61961e-11	-1.68162	down	CTP synthase N-terminus
AC234185.1_FG007	7.41404e-07	0.670527	normal	0.00173437	0.507959	normal	1.71496e-12	1.16755	up	0.0357564	0.381051	normal	2.44956e-09	1.05959	up	--
AC234202.1_FG004	1.52963e-10	3.93151	up	--	--	--	1.95095e-13	5.18414	up	--	--	--	9.70326e-13	5.78876	up	Myb/SANT-like DNA-binding domain
AC234203.1_FG009	1.90289e-13	1.46707	up	8.26477e-56	-2.46015	down	3.83631e-11	-0.996925	normal	0.38762	0.303791	normal	1.93801e-14	1.78693	up	rRNA-processing protein Efg1
AC234203.1_FG010	0.613729	-0.177009	normal	1.60297e-19	-1.49612	down	9.36294e-15	-1.67498	down	0.904335	-0.0427602	normal	0.566697	-0.211909	normal	--
AC234203.1_FG011	0.243487	-0.215923	normal	2.51014e-19	-0.90361	normal	1.29467e-18	-1.12716	down	0.0151336	0.323996	normal	0.513632	0.11611	normal	Ethylene insensitive 3
AC234515.1_FG002	4.12645e-17	5.6628	up	6.50925e-35	-7.17974	down	2.33544e-09	-1.61705	down	--	--	--	1.80226e-06	2.4032	up	Replication protein A OB domain
AC234515.1_FG003	1.33306e-13	1.18458	up	1.21173e-06	-0.760944	normal	0.00434428	0.415799	normal	0.0988583	-0.334139	normal	4.4685e-08	0.861241	normal	Tubulin/FtsZ family, GTPase domain
AC234526.1_FG005	--	--	--	0.0680682	-1.49753	normal	0.000162733	-2.55476	down	--	--	--	--	--	--	NAD dependent epimerase/dehydratase family
AC234528.1_FG001	0.00835256	0.874663	normal	7.46778e-22	4.36698	up	5.13569e-08	4.00975	up	0.0273631	0.812894	normal	1.84765e-05	1.69587	up	RCD1-SRO-TAF4 (RST) plant domain
AC234575.1_FG003	1.53938e-06	2.42394	up	--	--	--	1.21813e-08	2.59014	up	8.42897e-06	-2.30102	down	0.788394	0.131283	normal	Pyridoxal-phosphate dependent enzyme
AC235534.1_FG007	0.0502291	-0.80033	normal	0.180155	-0.401105	normal	0.000847035	-1.21058	down	3.02899e-08	-1.36317	down	8.00144e-12	-2.17321	down	START domain
AC235540.1_FG001	0.610151	-0.142714	normal	1.67691e-32	6.9614	up	1.07427e-28	6.9154	up	0.189135	-0.337378	normal	0.0946124	-0.471718	normal	--
AC235540.1_FG002	0.000214702	1.11957	up	0.960495	0.0232655	normal	0.000446454	1.13081	up	0.903424	-0.0698721	normal	0.00653135	1.05025	up	Protein kinase domain
AC235543.1_FG003	0.0653026	0.443603	normal	7.34528e-07	-1.00607	down	0.00521508	-0.572333	normal	0.00048626	-0.870268	normal	0.107602	-0.423592	normal	--
AC235544.1_FG006	0.0273527	-0.86624	normal	0.000101216	1.37622	up	0.222225	0.502255	normal	0.0357278	-0.655909	normal	6.79496e-08	-1.54985	down	Cupin
AF466202.2_FG007	0.000137669	1.41167	up	0.0664331	0.821298	normal	2.18422e-09	2.23892	up	1.13248e-05	-1.41974	down	0.963293	0.0200208	normal	Aldo/keto reductase family
AF466202.2_FG008	9.53878e-10	-0.635351	normal	1.29429e-09	-0.385408	normal	2.99302e-30	-1.03004	down	1.31504e-23	0.697293	normal	0.572946	0.0688695	normal	SPT2 chromatin protein
AF546187.1_FG001	0	-5.66594	down	4.56964e-12	-0.449819	normal	0	-6.13634	down	0.00045406	-0.232153	normal	0	-5.91165	down	Zein seed storage protein
AF546187.1_FG007	4.48153e-31	1.7566	up	3.11842e-58	1.01263	up	1.15641e-93	2.7584	up	0	-3.20121	down	2.02044e-25	-1.41631	down	Zein seed storage protein
AF546187.1_FG009	1.54518e-24	2.05227	up	0.108014	-0.44124	normal	8.07146e-17	1.59963	up	0.115003	-0.484379	normal	8.92528e-15	1.57847	up	Zein seed storage protein
AF546187.1_FG011	0.113969	0.69285	normal	0.00176816	1.6622	up	7.14234e-08	2.41676	up	0.974608	-0.0195801	normal	0.101931	0.696635	normal	Cytochrome P450
AF546188.1_FG001	0	6.78664	up	2.72182e-79	-1.30826	down	0	5.48751	up	0	-6.86069	down	0.949167	-0.0123211	normal	Zein seed storage protein
AF546188.1_FG002	0	5.87331	up	4.6282e-29	-1.08019	down	0	4.80407	up	0	-5.99187	down	0.583557	-0.0750233	normal	Zein seed storage protein
AF546188.1_FG005	1.44396e-08	-0.710168	normal	4.55482e-33	-0.762519	normal	6.99763e-53	-1.48183	down	1.9345e-07	-0.34628	normal	2.6021e-24	-1.04969	down	Zein seed storage protein
AF546188.1_FG006	7.35343e-77	3.51286	up	4.16959e-05	-2.46841	down	0.488894	0.466274	normal	0	-4.8415	down	1.46133e-20	-1.27885	down	Zein seed storage protein
AF546188.1_FG007	0.00065351	-0.444364	normal	4.70228e-74	-1.1899	down	3.75433e-68	-1.64235	down	2.45696e-14	0.50294	normal	0.600699	0.0650225	normal	Zein seed storage protein
AY530952.1_FG001	0.526536	0.237154	normal	0.000595833	0.988543	normal	0.000244346	1.20929	up	0.561931	0.229091	normal	0.253103	0.475799	normal	Mechanosensitive ion channel
EF517601.1_FG016	6.75922e-11	3.26837	up	--	--	--	3.76644e-11	2.01228	up	--	--	--	9.66187e-10	2.33542	up	Male Flower Specific protein 18
GRMZM2G000014	1.2305e-08	0.770628	normal	0.128368	0.216128	normal	1.84792e-10	0.97517	normal	1.27612e-09	0.86911	normal	2.27136e-27	1.64938	up	Cysteine rich domain with multizinc binding regions
GRMZM2G000093	0.699719	-0.213539	normal	0.000376347	-1.09523	down	0.000136244	-1.31826	down	0.00710838	-0.951113	normal	0.00258815	-1.16867	down	ERCC4 domain
GRMZM2G000158	0.474437	0.304016	normal	0.0388391	-0.616269	normal	0.338053	-0.317555	normal	2.16277e-45	-2.81775	down	4.50106e-28	-2.50043	down	AUX/IAA family
GRMZM2G000171	6.47841e-05	0.73933	normal	1.38068e-11	-1.04892	down	0.0570984	-0.316896	normal	0.804803	-0.0629581	normal	0.000192547	0.687606	normal	Basic region leucine zipper
GRMZM2G000209	0.189474	-0.611156	normal	0.263997	0.385744	normal	0.626703	-0.24193	normal	0.00684214	1.18595	up	0.339652	0.57767	normal	EamA-like transporter family
GRMZM2G000231	8.27991e-05	-0.798311	normal	0.324447	0.20746	normal	0.0061928	-0.599645	normal	1.69149e-10	-0.995958	normal	3.23249e-27	-1.79354	down	Prolyl oligopeptidase family
GRMZM2G000236	1.58407e-08	4.21522	up	2.89558e-05	-2.54183	down	1.75486e-38	3.22527	up	1.23575e-06	-2.90967	down	7.02891e-44	2.94469	up	NADH:flavin oxidoreductase / NADH oxidase family
GRMZM2G000264	3.94083e-40	-1.6945	down	0.00117473	2.58814	up	0.00101589	2.77645	up	6.03805e-125	2.43345	up	2.13687e-07	0.743074	normal	haloacid dehalogenase-like hydrolase
GRMZM2G000280	0.8157	0.0402923	normal	3.399e-32	1.10138	up	2.24726e-19	1.1294	up	6.29977e-18	0.967445	normal	5.69831e-12	1.01449	up	Sucrase/ferredoxin-like
GRMZM2G000288	2.22574e-13	-2.40279	down	4.98443e-59	8.64509	up	2.05051e-20	6.18524	up	1.39934e-81	3.31742	up	0.0785586	0.811941	normal	--
GRMZM2G000292	--	--	--	--	--	--	--	--	--	1.03848e-42	-5.98262	down	4.1161e-12	-3.43771	down	--
GRMZM2G000326	1.82269e-25	-2.33392	down	2.91466e-158	7.05011	up	2.48481e-34	4.60077	up	8.68523e-45	1.75949	up	0.0327519	-0.595183	normal	Potato inhibitor I family
GRMZM2G000339	0.0529201	0.676334	normal	0.0406737	-0.66359	normal	0.989327	0.00412798	normal	7.0481e-06	-1.39066	down	0.0108726	-0.714796	normal	--
GRMZM2G000361	0.550745	0.28696	normal	1.9968e-05	-1.15568	down	0.0163827	-0.85636	normal	0.00235931	-0.978703	normal	0.093282	-0.676015	normal	--
GRMZM2G000397	0.00356681	-0.543212	normal	0.332476	-0.120351	normal	2.93013e-05	-0.673554	normal	8.61105e-22	1.41255	up	1.4161e-05	0.874326	normal	EF hand
GRMZM2G000423	1.62797e-17	-1.25213	down	9.26961e-109	2.88482	up	2.98127e-27	1.62101	up	2.01712e-35	-1.19243	down	2.36584e-114	-2.44271	down	non-haem dioxygenase in morphine synthesis N-terminal
GRMZM2G000451	0.000129262	1.49257	up	1.29327e-07	-1.86092	down	0.291207	-0.378106	normal	0.155116	-0.736372	normal	0.0633329	0.755573	normal	Endonuclease/Exonuclease/phosphatase family
GRMZM2G000566	9.04664e-08	4.02938	up	5.57665e-08	-3.9488	down	0.664375	-0.0721158	normal	9.68831e-11	-3.51937	down	1.40131e-23	2.15128	up	Beta-L-arabinofuranosidase, GH127
GRMZM2G000581	0.0325256	-0.328625	normal	0.188562	0.171652	normal	0.33136	-0.165754	normal	8.72515e-21	1.39082	up	5.18084e-09	1.06965	up	Exostosin family
GRMZM2G000587	0.292286	0.703281	normal	0.124231	0.870514	normal	3.76568e-06	1.71577	up	0.489481	-0.57558	normal	0.861942	0.0775881	normal	Glycosyl transferase family 8
GRMZM2G000593	0.936629	0.0172577	normal	6.38848e-09	0.443542	normal	0.00310469	0.449733	normal	8.22823e-198	4.773	up	6.38495e-97	4.77364	up	--
GRMZM2G000608	0.0244843	0.903306	normal	0.538317	-0.312515	normal	0.17212	0.571039	normal	0.109486	1.00719	normal	0.00015465	1.97595	up	--
GRMZM2G000614	0.00842252	-0.736369	normal	3.97164e-14	1.55832	up	0.00523078	0.799138	normal	4.27019e-19	2.06119	up	1.52161e-05	1.32466	up	ABC-2 type transporter
GRMZM2G000633	1.80073e-56	-7.56945	down	1.76961e-39	-1.41381	down	1.51619e-88	-8.96955	down	4.94613e-59	3.49524	up	9.44636e-08	-4.09054	down	Protein tyrosine and serine/threonine kinase
GRMZM2G000640	0.00961686	-1.25852	down	5.55546e-15	5.20148	up	--	--	--	0.0605887	-0.71525	normal	2.65382e-06	-2.01369	down	--
GRMZM2G000686	0.667286	-0.0774363	normal	2.33869e-08	0.652091	normal	0.000156295	0.564138	normal	6.62358e-31	1.29859	up	1.09985e-19	1.22909	up	CCAAT-binding transcription factor (CBF-B/NF-YA) subunit B
GRMZM2G000739	0.452767	-0.204381	normal	0.0488166	-0.398775	normal	0.00273028	-0.613043	normal	3.28378e-08	-1.04402	down	3.80811e-10	-1.24374	down	Tetrapyrrole (Corrin/Porphyrin) Methylases
GRMZM2G000775	--	--	--	--	--	--	--	--	--	9.41613e-09	-2.59185	down	7.57444e-12	-4.0618	down	--
GRMZM2G000812	4.34451e-12	-1.23553	down	9.26121e-12	0.815219	normal	0.00741114	-0.436756	normal	0.630363	0.0707755	normal	1.04428e-14	-1.16482	down	Sugar efflux transporter for intercellular exchange
GRMZM2G000816	1.81968e-10	1.72844	up	4.45475e-09	-1.68472	down	0.941668	0.0228295	normal	0.0291079	-0.845436	normal	0.00258735	0.877822	normal	Solute carrier family 35
GRMZM2G000818	0.011921	0.777045	normal	9.93895e-09	-1.49379	down	0.00523984	-0.726508	normal	0.218162	-0.48094	normal	0.411805	0.299367	normal	Myb-like DNA-binding domain
GRMZM2G000825	0.0836202	1.103	normal	--	--	--	0.0257939	1.17458	normal	--	--	--	0.00840397	2.15229	up	Tetratricopeptide repeat
GRMZM2G000874	2.11844e-18	5.81746	up	--	--	--	5.28248e-17	5.67243	up	--	--	--	8.59862e-16	6.27387	up	--
GRMZM2G000932	0.0428632	0.850792	normal	0.903496	-0.0566157	normal	0.00249903	0.812628	normal	0.326786	0.472787	normal	6.91772e-07	1.38664	up	short chain dehydrogenase
GRMZM2G000936	0.276953	-0.253368	normal	1.4831e-21	-0.773125	normal	1.44081e-08	-1.02843	down	0.0514745	0.214802	normal	0.896764	-0.0329873	normal	Tetratricopeptide repeat
GRMZM2G000937	2.29405e-05	0.900121	normal	0.0322116	0.396261	normal	8.52687e-10	1.28665	up	1.20303e-10	-0.938348	normal	0.931258	-0.0221918	normal	Alg9-like mannosyltransferase family
GRMZM2G001079	0.0196512	0.565757	normal	0.313424	0.20947	normal	0.00011769	0.768704	normal	1.3664e-05	0.964914	normal	1.15157e-12	1.54706	up	Glycosyltransferase family 43
GRMZM2G001088	7.5389e-05	0.654364	normal	0.000743157	0.519841	normal	1.37813e-12	1.16452	up	0.0655302	-0.280884	normal	0.0214942	0.383341	normal	Sas10/Utp3/C1D family
GRMZM2G001116	0.274069	0.474945	normal	0.562279	0.282967	normal	0.0510865	0.759401	normal	0.00909959	1.47206	up	3.45646e-05	2.04039	up	Calponin homology (CH) domain
GRMZM2G001160	5.57348e-07	-1.12269	down	1.3143e-12	1.37214	up	0.431554	0.234113	normal	7.36931e-05	0.790451	normal	0.249889	-0.328464	normal	Helicase conserved C-terminal domain
GRMZM2G001221	0.640772	-0.126322	normal	4.34252e-68	-1.89734	down	1.39788e-30	-2.01987	down	0.00801028	0.505093	normal	0.131311	0.386198	normal	EF hand
GRMZM2G001241	0.0018094	-1.01438	down	0.420402	0.248776	normal	0.0037687	-0.786759	normal	0.139604	0.546872	normal	0.254784	-0.459089	normal	GDSL-like Lipase/Acylhydrolase
GRMZM2G001289	0.00046855	0.812126	normal	2.55203e-05	-0.819392	normal	0.953257	-0.0133097	normal	5.90209e-06	-1.04499	down	0.397452	-0.226758	normal	START domain
GRMZM2G001296	4.8442e-05	-0.870315	normal	0.226883	-0.210875	normal	5.94256e-08	-1.09077	down	8.06671e-05	0.806332	normal	0.856789	-0.0577069	normal	Uncharacterised protein family UPF0052
GRMZM2G001304	6.88537e-05	-0.600972	normal	1.31075e-19	1.0328	up	0.00605753	0.419858	normal	6.12416e-25	1.38431	up	7.05506e-06	0.789993	normal	Glycosyltransferase family 20
GRMZM2G001332	0.000215635	-1.96673	down	1.76265e-16	4.77635	up	--	--	--	2.9508e-15	4.44686	up	--	--	--	--
GRMZM2G001421	0.916728	0.0446902	normal	1.08813e-09	-1.29148	down	2.1075e-07	-1.25184	down	0.364399	-0.310837	normal	0.483411	-0.25981	normal	GH3 auxin-responsive promoter
GRMZM2G001447	0.000141811	2.03031	up	4.10752e-05	-2.13669	down	0.767581	-0.147402	normal	--	--	--	0.025771	1.38528	normal	CCT motif
GRMZM2G001514	2.04907e-22	1.86061	up	0.0186781	-0.408123	normal	4.20503e-20	1.45137	up	0.000834448	-0.602652	normal	9.9483e-15	1.27671	up	Fasciclin domain
GRMZM2G001524	--	--	--	2.23243e-18	-5.65336	down	1.23982e-17	-5.76937	down	--	--	--	--	--	--	Nucleoside diphosphate kinase
GRMZM2G001541	0.490985	0.185586	normal	3.9094e-26	-1.70797	down	1.71206e-19	-1.53051	down	0.737997	0.118198	normal	0.335317	0.312097	normal	--
GRMZM2G001639	0.00743019	-0.487428	normal	0.719491	0.0619964	normal	0.00370257	-0.436474	normal	6.59675e-07	-0.717961	normal	5.76316e-16	-1.20142	down	Phloem protein 2
GRMZM2G001645	5.13531e-07	0.679359	normal	5.7446e-30	-1.12403	down	7.67973e-05	-0.451747	normal	1.85173e-08	-0.6875	normal	0.993429	0.00138746	normal	Hydroxymethylglutaryl-coenzyme A reductase
GRMZM2G001648	7.75717e-46	-8.1188	down	0.000295348	-0.503006	normal	7.92515e-53	-8.63584	down	2.69978e-09	1.45986	up	6.98782e-22	-7.12528	down	--
GRMZM2G001660	0.0151962	1.12631	normal	--	--	--	0.000425138	1.49581	up	0.476307	-0.439056	normal	0.101686	0.704617	normal	GGL domain
GRMZM2G001661	0.0288304	-0.945667	normal	7.89591e-14	2.91812	up	8.10258e-09	2.01564	up	1.18694e-17	3.52927	up	6.83474e-12	2.67552	up	P21-Rho-binding domain
GRMZM2G001663	0.00612761	-0.717534	normal	0.0695763	0.345661	normal	0.145323	-0.384786	normal	1.1912e-06	1.30041	up	0.109337	0.591219	normal	FAR1 DNA-binding domain
GRMZM2G001676	0.000735354	-1.63669	down	0.713595	0.174675	normal	0.00117295	-1.49098	down	0.341779	0.456952	normal	0.0124595	-1.22533	normal	POT family
GRMZM2G001713	0.00923103	0.707696	normal	0.00120148	-1.65409	down	0.0020267	-1.09849	down	4.64938e-16	-1.59552	down	1.04197e-05	-0.875821	normal	Eukaryotic aspartyl protease
GRMZM2G001724	0.231532	-0.247086	normal	2.0707e-13	-1.02978	down	1.30346e-16	-1.28496	down	0.827481	0.0492676	normal	0.377085	-0.190165	normal	Mpv17 / PMP22 family
GRMZM2G001750	3.76148e-10	-1.16352	down	0.000247636	0.629795	normal	0.0129129	-0.542739	normal	0.0108266	0.499184	normal	0.00530347	-0.656682	normal	Alpha/beta hydrolase family
GRMZM2G001799	1.27166e-05	-2.19091	down	5.02684e-12	4.2323	up	--	--	--	0.270533	0.648572	normal	--	--	--	AUX/IAA family
GRMZM2G001805	0.651621	-0.133903	normal	0.0345735	-0.387393	normal	0.0205882	-0.529182	normal	1.1449e-25	2.82198	up	1.29091e-18	2.70573	up	Protein of unknown function (DUF493)
GRMZM2G001812	--	--	--	--	--	--	--	--	--	2.42773e-11	-3.84736	down	1.91262e-07	-2.79737	down	Leucine rich repeat
GRMZM2G001820	1.03845e-05	-1.20992	down	0.596866	-0.0981023	normal	6.2064e-08	-1.32314	down	0.199472	-0.242238	normal	4.42943e-09	-1.45765	down	BNR repeat-like domain
GRMZM2G001853	0.973737	0.026985	normal	0.0454182	1.18982	normal	6.11975e-10	1.39913	up	0.796696	-0.195762	normal	0.500816	-0.191051	normal	--
GRMZM2G001869	6.50937e-06	1.06685	up	0.525122	-0.177609	normal	5.87027e-06	0.885683	normal	0.274097	0.366838	normal	2.10733e-09	1.45358	up	DNA double-strand break repair and V(D)J recombination protein XRCC4
GRMZM2G001889	--	--	--	--	--	--	0.930645	0.0635137	normal	0.0023648	-1.71839	down	0.444802	-0.513938	normal	--
GRMZM2G001895	0.000725876	-0.853201	normal	0.00965399	-0.214644	normal	5.01215e-06	-1.07469	down	0.000401689	0.263994	normal	0.0150043	-0.591635	normal	GYF domain 2
GRMZM2G001898	0.00294604	-0.568309	normal	5.82895e-06	0.397293	normal	0.360447	-0.183527	normal	1.73363e-13	-0.569845	normal	1.60758e-11	-1.12971	down	Aldehyde dehydrogenase family
GRMZM2G001905	1.87552e-74	7.63926	up	8.884e-44	-6.12009	down	6.76407e-19	1.52966	up	2.53318e-20	-4.98018	down	4.74378e-25	2.57247	up	NUDIX domain
GRMZM2G001915	0.398539	-0.466807	normal	0.181346	-0.662046	normal	0.0298348	-1.1292	normal	0.10624	-0.782342	normal	0.00825467	-1.27153	down	Mitochondrial carrier protein
GRMZM2G001938	0.000931719	-0.655569	normal	0.0549084	0.354724	normal	0.117623	-0.310714	normal	2.9249e-38	-1.76434	down	2.86883e-59	-2.41874	down	Exostosin family
GRMZM2G001953	2.36874e-39	2.22705	up	2.16301e-32	-1.7846	down	0.00207478	0.439069	normal	3.79687e-21	-1.60462	down	2.75438e-05	0.635554	normal	Ras family
GRMZM2G001956	0.587796	-0.22505	normal	6.11859e-05	1.69073	up	0.000554977	1.47824	up	0.255255	0.494716	normal	0.507123	0.285238	normal	FKBP-type peptidyl-prolyl cis-trans isomerase
GRMZM2G001973	0.768253	0.0674211	normal	1.74121e-40	1.94579	up	2.18592e-24	1.99444	up	2.18587e-08	0.792239	normal	7.63428e-06	0.865871	normal	Remorin, C-terminal region
GRMZM2G001991	0.195505	-0.344175	normal	4.0397e-24	1.09356	up	0.00206868	0.723459	normal	1.04213e-82	2.75581	up	3.37001e-22	2.39213	up	3-beta hydroxysteroid dehydrogenase/isomerase family
GRMZM2G002002	0.000290915	-1.16699	down	3.85747e-15	0.758849	normal	0.188991	-0.444179	normal	1.10517e-18	0.773494	normal	0.217914	-0.418327	normal	Nucleotidyltransferase domain
GRMZM2G002010	0.876979	0.0698139	normal	0.279279	-0.295212	normal	0.501819	-0.230606	normal	2.11162e-07	1.73354	up	1.1137e-06	1.8181	up	Drought induced 19 protein (Di19), zinc-binding
GRMZM2G002043	0.000197838	-2.84043	down	4.0725e-11	4.60139	up	--	--	--	0.508426	0.389921	normal	--	--	--	PPR repeat
GRMZM2G002075	1.16665e-08	1.57653	up	0.57621	-0.221206	normal	2.0792e-07	1.34855	up	0.197321	0.639218	normal	8.32924e-11	2.2448	up	bZIP transcription factor
GRMZM2G002115	0.00336025	0.543839	normal	2.01335e-11	-0.985116	normal	0.00872457	-0.448937	normal	0.000985356	0.675437	normal	8.56406e-11	1.23243	up	CRT-like, chloroquine-resistance transporter-like
GRMZM2G002128	7.67768e-05	-1.26296	down	7.88968e-11	2.38973	up	0.0167141	1.12223	normal	1.12523e-17	3.31358	up	1.65629e-05	2.08135	up	Myb-like DNA-binding domain
GRMZM2G002131	0.0047158	-0.974259	normal	0.00319092	1.299	up	0.0549752	0.382233	normal	0.0053084	1.36591	up	0.0828036	0.478203	normal	HSF-type DNA-binding
GRMZM2G002142	--	--	--	--	--	--	--	--	--	4.00356e-10	-4.65454	down	0.767324	-0.203618	normal	Cytochrome P450
GRMZM2G002147	0.0984648	1.03896	normal	--	--	--	0.0166595	1.31614	normal	--	--	--	1.25889e-08	4.92615	up	--
GRMZM2G002173	--	--	--	4.07621e-09	-2.58106	down	0.00381857	-1.22478	down	--	--	--	--	--	--	DNA / pantothenate metabolism flavoprotein
GRMZM2G002178	8.73358e-30	2.7473	up	5.25407e-07	2.12665	up	3.63241e-64	4.94064	up	1.67257e-08	2.84324	up	3.41079e-63	5.77557	up	Cytochrome P450
GRMZM2G002199	--	--	--	--	--	--	--	--	--	2.41976e-15	-4.99208	down	2.36404e-15	-6.21124	down	--
GRMZM2G002220	1.61291e-19	0.928231	normal	0.458016	0.0680524	normal	1.98976e-23	0.986943	normal	0.000157364	0.323085	normal	2.65136e-37	1.26074	up	Hsp90 protein
GRMZM2G002297	6.26922e-18	-1.61177	down	9.07859e-39	2.24634	up	0.0116861	0.619222	normal	1.1967e-09	0.968808	normal	0.00258894	-0.640672	normal	CorA-like Mg2+ transporter protein
GRMZM2G002315	0.0162834	-1.14328	normal	3.14917e-12	4.78404	up	--	--	--	0.000470609	2.10074	up	--	--	--	--
GRMZM2G002391	2.00302e-05	-0.885662	normal	0.35785	-0.171762	normal	2.94953e-11	-1.07267	down	0.0136723	-0.454624	normal	7.2402e-15	-1.34145	down	Nucleoside transporter
GRMZM2G002492	0.021962	-0.395603	normal	6.70038e-14	1.14364	up	2.8113e-05	0.738209	normal	7.49757e-14	1.38698	up	2.735e-06	1.00287	up	--
GRMZM2G002559	2.92783e-06	1.11885	up	0.00642367	0.95017	normal	3.39872e-13	2.06472	up	0.323766	0.435327	normal	1.43907e-05	1.55767	up	--
GRMZM2G002569	--	--	--	--	--	--	--	--	--	1.08278e-24	-6.09474	down	3.53854e-21	-7.00872	down	Protein kinase domain
GRMZM2G002616	0.00361155	0.712127	normal	0.75508	-0.0558141	normal	0.000346163	0.653097	normal	0.042523	0.348718	normal	7.32868e-09	1.07653	up	Eukaryotic initiation factor 4E
GRMZM2G002626	0.808148	-0.0686328	normal	0.000856966	0.718381	normal	0.00335367	0.642201	normal	1.05738e-05	1.12287	up	3.67636e-05	1.07062	up	Rad51
GRMZM2G002627	6.67094e-19	-3.3756	down	8.17161e-05	-0.858515	normal	5.95792e-40	-4.28814	down	4.59491e-06	1.46839	up	0.000417831	-1.90142	down	--
GRMZM2G002630	5.82143e-05	0.602237	normal	3.70219e-09	-0.527028	normal	0.586974	0.0689085	normal	1.72053e-57	-1.31468	down	3.5795e-11	-0.700663	normal	Jacalin-like lectin domain
GRMZM2G002656	0.433681	-0.239909	normal	5.61762e-190	4.60185	up	1.3052e-53	4.2583	up	5.99817e-116	3.11593	up	7.43541e-27	2.84542	up	NB-ARC domain
GRMZM2G002754	0.275411	-0.476947	normal	0.00526631	1.16903	up	0.179004	0.682348	normal	0.00135256	-1.02056	down	2.87012e-05	-1.50246	down	2Fe-2S iron-sulfur cluster binding domain
GRMZM2G002756	0.00934286	0.674052	normal	0.00210013	-0.690883	normal	0.919895	-0.0239361	normal	0.277964	0.35933	normal	7.08084e-05	1.04893	up	ATP-dependent Clp protease adaptor protein ClpS
GRMZM2G002786	0.158753	0.323387	normal	2.31446e-17	1.71939	up	2.40238e-22	2.0349	up	0.136694	-0.286795	normal	0.846772	0.046489	normal	Reticulon
GRMZM2G002830	9.24868e-05	1.60617	up	0.0137273	-1.00406	normal	0.114941	0.6024	normal	--	--	--	6.07066e-07	2.23085	up	Ubiquitin-conjugating enzyme
GRMZM2G002859	1.70724e-08	-0.89601	normal	0.0379707	-0.210469	normal	5.22151e-15	-1.11614	down	0.0683053	0.26153	normal	0.000791502	-0.627396	normal	Variant SH3 domain
GRMZM2G002879	0.0943198	0.415928	normal	4.66027e-65	-2.33426	down	2.25662e-33	-1.91939	down	1.40565e-21	-1.63549	down	8.30069e-11	-1.21067	down	Metallopeptidase family M24
GRMZM2G002894	0.0376357	-0.344586	normal	0.329879	-0.108756	normal	0.000693547	-0.462632	normal	8.55421e-100	3.69419	up	8.65642e-54	3.358	up	--
GRMZM2G002910	9.37589e-11	-0.923913	normal	1.96473e-51	1.59333	up	3.76467e-06	0.655927	normal	0.954979	-0.00835743	normal	4.90774e-11	-0.926997	normal	AAA domain
GRMZM2G002918	3.52541e-24	6.45665	up	4.08013e-27	-6.53847	down	0.685672	-0.130792	normal	--	--	--	0.054458	1.91927	normal	--
GRMZM2G002921	0.27283	0.275763	normal	4.90861e-09	1.95915	up	2.57944e-10	2.21744	up	0.236696	-0.313044	normal	0.922501	-0.0302849	normal	Phosphopantetheine attachment site
GRMZM2G003002	9.39034e-07	0.949899	normal	0.0203596	0.370889	normal	1.21433e-13	1.31261	up	0.483181	-0.134001	normal	9.49249e-06	0.828819	normal	linker histone H1 and H5 family
GRMZM2G003023	0.187055	0.60933	normal	0.0483365	0.862689	normal	0.000962156	1.46056	up	0.770711	0.152294	normal	0.0917407	0.782945	normal	Ubiquitin-2 like Rad60 SUMO-like
GRMZM2G003028	0.457952	-0.265663	normal	2.61105e-05	1.17363	up	0.0119299	0.886301	normal	0.64455	-0.191741	normal	0.334221	-0.444483	normal	Thioredoxin
GRMZM2G003064	0.230958	-0.472852	normal	0.0261257	-0.603055	normal	0.000283164	-1.08813	down	0.736122	-0.14849	normal	0.155797	-0.614663	normal	Erg28 like protein
GRMZM2G003108	3.05662e-17	-1.32434	down	0.770754	0.0333476	normal	2.3041e-21	-1.30331	down	1.08853e-09	0.670175	normal	6.24007e-05	-0.65062	normal	CRAL/TRIO domain
GRMZM2G003186	1.63578e-34	-7.32193	down	0.10226	-0.307799	normal	4.67141e-38	-7.66606	down	9.72495e-28	3.36956	up	--	--	--	Enoyl-CoA hydratase/isomerase
GRMZM2G003225	3.13526e-16	2.55087	up	0.558061	0.363871	normal	3.29124e-13	2.87072	up	--	--	--	2.86308e-27	7.68184	up	Nse4 C-terminal
GRMZM2G003306	0.0934154	0.748906	normal	0.573388	0.246599	normal	3.30052e-05	1.02994	up	0.916403	0.0563654	normal	0.00870117	0.842792	normal	C-terminus of histone H2A
GRMZM2G003318	0.71066	0.107834	normal	7.11455e-19	-1.32568	down	1.07061e-10	-1.22051	down	0.648051	-0.128821	normal	0.971261	-0.0124464	normal	PAP_fibrillin
GRMZM2G003377	4.15269e-12	-1.10049	down	0.000290044	0.51901	normal	0.000769081	-0.591072	normal	1.2176e-05	0.649079	normal	0.0160486	-0.445457	normal	--
GRMZM2G003379	2.29088e-29	1.59454	up	0.00761413	0.499743	normal	1.3421e-35	2.08175	up	9.60233e-05	-0.588213	normal	2.00917e-14	1.01859	up	Glycosyl hydrolase family 9
GRMZM2G003384	4.03753e-05	0.828941	normal	3.93106e-08	0.800874	normal	5.01878e-25	1.62418	up	0.000355112	-0.499502	normal	0.0409421	0.343885	normal	Ribosomal protein L6e
GRMZM2G003389	0.00558916	0.923391	normal	0.643354	-0.177345	normal	0.00218132	0.748537	normal	0.295912	0.480134	normal	9.67217e-06	1.43879	up	--
GRMZM2G003409	8.48344e-21	-1.78868	down	0.0260119	-0.243595	normal	2.45847e-35	-2.0474	down	0.535177	-0.123138	normal	8.35268e-17	-1.90429	down	Ricin-type beta-trefoil lectin domain-like
GRMZM2G003411	0.427096	0.355375	normal	0.165679	0.495664	normal	0.0592095	0.826842	normal	3.691e-06	-1.12087	down	0.0443523	-0.736569	normal	ABC-2 type transporter
GRMZM2G003424	1.30703e-08	1.16604	up	0.0557516	0.467239	normal	3.84597e-19	1.63317	up	0.78804	-0.079483	normal	1.84322e-09	1.10302	up	RNA recognition motif. (a.k.a. RRM, RBD, or RNP domain)
GRMZM2G003461	0.757594	-0.14476	normal	1.23263e-16	5.41404	up	1.50897e-14	5.35062	up	4.77136e-08	3.33279	up	5.63027e-06	3.2493	up	--
GRMZM2G003489	8.99408e-09	2.36064	up	0.0031051	-1.31947	down	0.00299191	1.03812	up	3.34786e-28	-3.38031	down	0.00100993	-0.951715	normal	--
GRMZM2G003506	0.00105629	-1.69417	down	0.236209	0.488277	normal	0.0131659	-1.25091	normal	0.80934	-0.125772	normal	0.000315552	-1.87176	down	Protein of unknown function (DUF568)
GRMZM2G003514	0.82091	-0.119093	normal	0.00291588	1.47168	up	0.00406949	1.37905	up	0.0286665	1.57417	normal	0.0686711	1.51733	normal	K-box region
GRMZM2G003518	0.00906374	-0.82728	normal	1.1616e-10	1.8325	up	0.0157614	0.973782	normal	0.00655778	0.75681	normal	0.883494	-0.0677721	normal	Exo70 exocyst complex subunit
GRMZM2G003530	0.0239544	0.501086	normal	0.0627638	0.404634	normal	1.31399e-06	0.900351	normal	2.7722e-12	-1.22162	down	5.33895e-05	-0.711982	normal	--
GRMZM2G003563	0.770869	0.0743416	normal	1.03803e-10	1.1079	up	1.2215e-09	1.17186	up	0.00950449	0.484967	normal	0.00697816	0.568642	normal	short chain dehydrogenase
GRMZM2G003595	0.00096749	2.78479	up	--	--	--	1.46349e-14	3.14447	up	0.00145011	-2.69909	down	0.0515042	0.719835	normal	--
GRMZM2G003625	0.000995589	-1.51502	down	1.80879e-10	3.475	up	1.10571e-09	2.28992	up	0.00550079	1.67552	up	0.496058	0.303754	normal	NB-ARC domain
GRMZM2G003631	9.03372e-30	6.94827	up	--	--	--	2.13571e-27	6.78565	up	1.90792e-29	-7.01618	down	0.837866	-0.0652576	normal	--
GRMZM2G003682	0.000417394	1.07707	up	1.48282e-06	-1.24205	down	0.485476	-0.170026	normal	4.09379e-46	-2.97094	down	3.87475e-22	-1.88202	down	Hs1pro-1 protein C-terminus
GRMZM2G003715	0.897541	-0.0335099	normal	2.36316e-18	-1.08934	down	8.70334e-13	-1.12884	down	2.46385e-07	-0.760876	normal	1.05244e-05	-0.785357	normal	No apical meristem (NAM) protein
GRMZM2G003732	1.79526e-06	0.925266	normal	0.598107	0.116535	normal	1.4357e-10	1.03771	up	0.0126346	-0.468729	normal	0.00257595	0.470394	normal	Utp25, U3 small nucleolar RNA-associated SSU processome protein 25
GRMZM2G003742	5.44528e-05	1.57553	up	0.433075	0.392977	normal	1.79231e-09	2.00519	up	0.290057	-0.51458	normal	0.00151057	1.09609	up	PPR repeat family
GRMZM2G003754	0.0818312	0.629601	normal	0.0359896	0.71475	normal	5.42722e-07	1.35585	up	0.713901	0.164698	normal	0.0191848	0.812195	normal	--
GRMZM2G003755	6.48067e-06	-0.998735	normal	0.847556	-0.0268471	normal	1.06562e-06	-1.03509	down	0.0452909	0.284577	normal	0.00216265	-0.712385	normal	NB-ARC domain
GRMZM2G003769	0.203747	0.639142	normal	0.322873	-0.48222	normal	0.73969	0.147835	normal	0.00824143	-1.19231	down	0.171797	-0.564241	normal	Peroxisomal biogenesis factor 11 (PEX11)
GRMZM2G003775	0.189093	-0.612168	normal	2.48844e-06	-0.764915	normal	0.000544171	-1.35515	down	0.645707	-0.119914	normal	0.103349	-0.733048	normal	--
GRMZM2G003794	--	--	--	5.85162e-10	-3.97588	down	5.98122e-05	-2.21136	down	--	--	--	--	--	--	Glycosyl hydrolase family 10
GRMZM2G003796	--	--	--	2.454e-14	-2.4912	down	1.62947e-16	-2.65445	down	--	--	--	--	--	--	Cytochrome P450
GRMZM2G003835	0.118493	0.695191	normal	4.83616e-05	-1.26508	down	0.100544	-0.56437	normal	0.000166456	-1.32255	down	0.110519	-0.614885	normal	--
GRMZM2G003853	1.34176e-28	1.21273	up	3.51617e-06	-0.475595	normal	9.56966e-12	0.728782	normal	0.000271222	0.457871	normal	6.54265e-47	1.68076	up	EXPERA (EXPanded EBP superfamily)
GRMZM2G003869	0.984016	0.00942719	normal	0.00280703	1.26251	up	0.00182332	1.28046	up	0.0846263	1.05427	normal	0.101985	1.09715	normal	PPR repeat family
GRMZM2G003897	0.127733	0.471672	normal	0.0010156	0.694809	normal	1.21254e-07	1.16158	up	0.790842	-0.0745667	normal	0.115529	0.410906	normal	RNA recognition motif. (a.k.a. RRM, RBD, or RNP domain)
GRMZM2G003909	--	--	--	0.000201218	-2.92982	down	1.64172e-29	-5.19345	down	--	--	--	--	--	--	Pollen protein Ole e 1 like
GRMZM2G003930	2.08528e-31	-1.99603	down	1.24762e-20	1.46477	up	0.0290001	-0.535849	normal	3.07172e-99	3.6208	up	2.59987e-09	1.62062	up	Protein of unknown function (DUF3675)
GRMZM2G003947	0.574336	0.22223	normal	0.905494	-0.0361447	normal	0.469139	0.18044	normal	0.00330773	0.805645	normal	2.25518e-06	1.05098	up	--
GRMZM2G003970	0.554676	0.361856	normal	--	--	--	9.29779e-06	1.89773	up	0.268449	0.681989	normal	0.0169159	1.11776	normal	--
GRMZM2G003988	0.183707	0.193952	normal	0.00734179	0.290944	normal	1.51426e-05	0.476332	normal	4.93121e-12	0.855713	normal	7.56041e-16	1.05956	up	LEM3 (ligand-effect modulator 3) family / CDC50 family
GRMZM2G004006	0.101137	-0.84103	normal	3.27726e-07	3.32372	up	--	--	--	3.81759e-09	-1.89394	down	2.64176e-14	-2.77619	down	--
GRMZM2G004087	0.0788918	-1.20967	normal	7.49663e-19	1.37619	up	0.927483	-0.0739323	normal	1.89016e-11	0.846292	normal	0.49687	-0.529398	normal	Vta1 like
GRMZM2G004090	0.0640053	-0.850505	normal	0.00353222	1.12336	up	0.593715	0.254946	normal	0.942631	0.0357438	normal	0.0443657	-0.833255	normal	Myb-like DNA-binding domain
GRMZM2G004092	0.0861344	-0.481503	normal	3.03073e-07	1.36424	up	0.0115772	0.869329	normal	0.0112973	0.601015	normal	0.718008	0.124882	normal	Domain of unknown function (DUF4378)
GRMZM2G004119	0.0270675	-0.738511	normal	4.18948e-13	-1.28086	down	2.68588e-15	-2.01981	down	0.000241498	-0.925492	normal	2.33974e-07	-1.65934	down	--
GRMZM2G004138	0.0577472	-0.642465	normal	1.04434e-06	1.22421	up	0.00278296	0.572582	normal	0.00034094	0.956771	normal	0.192549	0.316741	normal	O-methyltransferase
GRMZM2G004157	0.179738	-0.367415	normal	2.85612e-32	-1.55626	down	1.6942e-25	-1.9262	down	1.06645e-15	-1.31427	down	5.63791e-15	-1.67369	down	--
GRMZM2G004163	4.52262e-30	-6.96473	down	2.04444e-14	2.13638	up	2.14453e-11	-4.85132	down	4.48534e-22	4.10576	up	--	--	--	--
GRMZM2G004182	0.363126	0.290487	normal	1.61563e-19	-1.41345	down	7.46821e-07	-1.11682	down	0.67012	-0.125991	normal	0.609134	0.174657	normal	--
GRMZM2G004301	0.102065	-0.287302	normal	1.13593e-07	-0.688414	normal	1.29531e-11	-0.98478	normal	2.59805e-12	-0.861135	normal	1.58098e-17	-1.14186	down	Endonuclease/Exonuclease/phosphatase family
GRMZM2G004305	0.0295382	0.996637	normal	--	--	--	2.80496e-05	1.99149	up	--	--	--	5.01623e-14	6.02074	up	Chromo (CHRromatin Organisation MOdifier) domain
GRMZM2G004314	1.44912e-09	3.6298	up	--	--	--	1.94132e-08	3.46146	up	--	--	--	6.11379e-08	2.89098	up	V-type ATPase 116kDa subunit family
GRMZM2G004352	0.10678	-0.810357	normal	0.695671	-0.189211	normal	0.0518205	-0.995541	normal	3.81671e-26	-2.68021	down	7.37311e-29	-3.52278	down	--
GRMZM2G004377	0.572593	-0.14071	normal	0.417977	-0.186258	normal	0.159593	-0.335046	normal	1.16988e-14	-1.25416	down	4.97791e-16	-1.39075	down	Stage II sporulation protein E (SpoIIE)
GRMZM2G004412	1.32612e-09	1.75323	up	0.00213027	-0.747595	normal	0.000749092	1.0042	up	0.155749	0.472359	normal	4.68296e-14	2.25284	up	NB-ARC domain
GRMZM2G004435	0.0138682	-0.532555	normal	0.822955	-0.0468822	normal	0.000375523	-0.591342	normal	0.000879115	-0.570474	normal	8.02922e-13	-1.10108	down	Glycosyl hydrolases family 28
GRMZM2G004466	0.0302764	1.88261	normal	--	--	--	1.28204e-10	4.77107	up	--	--	--	3.52339e-30	8.02907	up	Probable lipid transfer
GRMZM2G004475	0.858061	0.0363939	normal	1.02645e-20	1.14843	up	7.10787e-20	1.17584	up	9.19883e-24	1.45082	up	9.42399e-22	1.49721	up	WD domain, G-beta repeat
GRMZM2G004500	--	--	--	6.69443e-16	-4.35911	down	2.94978e-08	-3.167	down	--	--	--	--	--	--	Glycosyl hydrolases family 28
GRMZM2G004521	3.1842e-14	-5.25519	down	0.211269	0.541578	normal	--	--	--	0.689091	0.210639	normal	3.98227e-11	-5.46995	down	Kelch motif
GRMZM2G004528	0.78629	-0.0625402	normal	3.44235e-25	-0.57484	normal	7.25579e-05	-0.641496	normal	9.39466e-75	-1.04984	down	3.61736e-12	-1.09836	down	Myo-inositol-1-phosphate synthase
GRMZM2G004548	0.000759425	-1.14066	down	0.000261548	1.06826	up	0.813744	-0.0904458	normal	0.188968	-0.386597	normal	4.93276e-09	-1.55063	down	PLATZ transcription factor
GRMZM2G004572	2.2025e-07	1.20238	up	3.5935e-06	-0.796185	normal	0.0917459	0.405357	normal	0.486629	-0.168897	normal	6.7564e-06	1.04997	up	Protein kinase domain
GRMZM2G004582	0.00223137	0.857978	normal	0.389633	-0.195461	normal	0.0401965	0.649832	normal	0.000797451	0.666322	normal	6.96586e-08	1.53262	up	Calcineurin-like phosphoesterase
GRMZM2G004590	1.15945e-05	0.739877	normal	3.44241e-27	-0.970153	normal	0.175261	-0.232488	normal	1.56407e-07	0.53235	normal	4.18704e-16	1.28168	up	Shikimate kinase
GRMZM2G004641	0.337931	0.464878	normal	0.0181358	1.21085	normal	0.000537212	1.68242	up	0.0553969	1.01412	normal	0.00102639	1.53484	up	Associated with HOX
GRMZM2G004690	4.10087e-10	-2.39364	down	1.52374e-08	2.30683	up	--	--	--	4.93113e-15	3.6549	up	--	--	--	--
GRMZM2G004694	--	--	--	0.00157817	-2.08194	down	4.41773e-06	-3.28512	down	--	--	--	--	--	--	Sugar (and other) transporter
GRMZM2G004699	7.37568e-18	2.18268	up	4.21458e-19	-2.08892	down	0.690469	0.0899764	normal	0.489237	-0.297275	normal	8.15129e-13	1.89912	up	Glycosyl hydrolases family 16
GRMZM2G004703	4.34145e-06	0.821109	normal	1.11306e-08	-0.468048	normal	0.0557487	0.348904	normal	0.0379169	0.167835	normal	1.33656e-09	1.00009	up	EF hand
GRMZM2G004709	0.169326	0.48453	normal	0.0420015	0.654236	normal	8.18859e-05	1.13893	up	0.887253	0.0565862	normal	0.0602779	0.558945	normal	PPPDE putative peptidase domain
GRMZM2G004847	1.67103e-09	1.23538	up	0.961005	0.0119392	normal	7.83293e-10	1.23945	up	0.844426	0.0520185	normal	1.39482e-11	1.30388	up	Glutaredoxin
GRMZM2G004858	2.54864e-15	-2.03489	down	2.50538e-10	1.32999	up	0.0347629	-0.716049	normal	0.782991	0.0660927	normal	1.74356e-13	-1.97625	down	UDP-glucoronosyl and UDP-glucosyl transferase
GRMZM2G004878	0.394734	0.424109	normal	0.0706956	-0.708511	normal	0.395949	-0.296528	normal	0.00607779	-1.05645	down	0.0499792	-0.637574	normal	linker histone H1 and H5 family
GRMZM2G004880	0.847376	0.0786642	normal	0.0576658	0.542099	normal	0.0581502	0.610151	normal	1.90188e-05	-1.00313	down	0.00107326	-0.91463	normal	Kinase/pyrophosphorylase
GRMZM2G004888	0.000277853	-0.743516	normal	6.2537e-34	1.88296	up	2.88197e-07	1.11921	up	0.0311396	0.351568	normal	0.0868759	-0.387776	normal	PPR repeat
GRMZM2G004924	0.125879	-0.454223	normal	4.55159e-07	1.37519	up	0.00131016	0.916603	normal	0.000193729	1.02134	up	0.0420882	0.579625	normal	DNA replication factor CDT1 like
GRMZM2G004949	0.00382953	-0.713495	normal	0.0235804	-0.38145	normal	5.16557e-07	-1.10369	down	0.365699	0.191424	normal	0.0404009	-0.518917	normal	PAP2 superfamily C-terminal
GRMZM2G004955	0.969693	0.0217991	normal	4.09806e-05	-1.30483	down	7.06713e-05	-1.29641	down	0.000168092	-1.23899	down	0.000144743	-1.22528	down	Expansin C-terminal domain
GRMZM2G004957	0.024282	0.968041	normal	0.612883	0.271415	normal	0.000453286	1.26209	up	0.544603	-0.343132	normal	0.122187	0.637951	normal	START domain
GRMZM2G004959	9.52374e-08	0.84566	normal	1.01478e-12	-0.734604	normal	0.514011	0.106009	normal	2.14097e-24	-1.07808	down	0.17373	-0.219484	normal	LIM domain
GRMZM2G004988	8.74165e-30	2.75083	up	0.456944	0.356403	normal	2.42718e-22	3.06536	up	0.0461097	-0.698101	normal	3.21792e-31	2.081	up	SSXT protein (N-terminal region)
GRMZM2G004990	0.000141697	0.65109	normal	0.310753	-0.177256	normal	0.00407859	0.465439	normal	4.95625e-12	-1.09406	down	0.0168023	-0.434389	normal	Protein of unknown function, DUF547
GRMZM2G005013	--	--	--	0.00506229	-1.22902	down	0.0747431	-0.942903	normal	5.63084e-12	-2.51896	down	1.00644e-06	-2.22046	down	Mechanosensitive ion channel
GRMZM2G005024	0.0622989	0.314016	normal	1.33576e-42	-1.30191	down	1.5878e-17	-0.9938	normal	0.290862	-0.137678	normal	0.212963	0.186401	normal	Pyridoxal-phosphate dependent enzyme
GRMZM2G005040	0.00108538	0.719483	normal	5.57036e-10	-1.17638	down	0.0160573	-0.465649	normal	0.989608	0.00419187	normal	0.00146442	0.733938	normal	K+ potassium transporter
GRMZM2G005066	2.14769e-19	5.9787	up	6.01292e-37	-7.32046	down	2.20225e-05	-1.31077	down	6.5283e-55	-8.76932	down	8.89531e-24	-2.75918	down	Myb-like DNA-binding domain
GRMZM2G005134	0.111089	-0.533071	normal	2.83904e-30	6.78336	up	8.95822e-22	6.27515	up	1.10984e-18	3.47544	up	5.11702e-09	2.94597	up	NB-ARC domain
GRMZM2G005146	3.38095e-06	-2.93531	down	1.43208e-16	5.41673	up	--	--	--	0.123508	1.37561	normal	--	--	--	Dormancy/auxin associated protein
GRMZM2G005155	2.58833e-13	-4.67026	down	3.12706e-15	5.23895	up	--	--	--	9.37443e-06	2.83965	up	--	--	--	SRF-type transcription factor (DNA-binding and dimerisation domain)
GRMZM2G005163	0.600118	-0.121949	normal	0.786666	0.0523541	normal	0.683894	-0.0790135	normal	6.03756e-10	1.42689	up	1.37459e-07	1.31914	up	UAA transporter family
GRMZM2G005195	0.000115609	-1.25862	down	0.0347387	0.622249	normal	0.104969	-0.640015	normal	0.923651	0.0368282	normal	0.00106522	-1.21937	down	VAD1 Analog of StAR-related lipid transfer domain
GRMZM2G005207	--	--	--	3.56693e-05	-3.19468	down	1.10255e-22	-6.38029	down	4.50094e-20	-5.16433	down	7.67253e-20	-6.83785	down	WRKY DNA -binding domain
GRMZM2G005260	2.78104e-06	-0.99387	normal	0.134238	-0.240156	normal	8.06162e-10	-1.24312	down	0.871434	-0.0351074	normal	2.4746e-06	-1.02523	down	Methyltransferase domain
GRMZM2G005278	0.000115542	1.2231	up	1.41719e-18	-2.16835	down	2.50824e-07	-0.953015	normal	7.3243e-07	-1.47377	down	0.320472	-0.24131	normal	--
GRMZM2G005347	2.25473e-05	3.37487	up	0.000295348	-2.78525	down	0.00278296	0.931226	normal	2.2455e-05	-3.36608	down	0.451556	0.244843	normal	NB-ARC domain
GRMZM2G005365	0.80141	-0.0781184	normal	0.0194219	-0.480856	normal	0.0102181	-0.567898	normal	1.0572e-06	1.37164	up	5.35048e-06	1.31306	up	FANCL C-terminal domain
GRMZM2G005374	0.0368076	0.692523	normal	9.19691e-08	-1.28495	down	0.00937645	-0.597598	normal	0.0398819	-0.643806	normal	0.857946	0.0600931	normal	--
GRMZM2G005433	0.710298	-0.163937	normal	0.014593	1.07621	normal	0.0524219	0.912898	normal	0.00413861	1.36127	up	0.0112703	1.24184	normal	Psb28 protein
GRMZM2G005444	0.142752	0.306959	normal	0.05041	-0.344784	normal	0.839493	-0.0456293	normal	0.00134953	0.733029	normal	6.59959e-06	1.05123	up	alpha/beta hydrolase fold
GRMZM2G005483	0.314581	0.35325	normal	1.46905e-06	-1.0813	down	0.00578984	-0.72933	normal	2.42392e-05	-1.04361	down	0.0153067	-0.680836	normal	Sad1 / UNC-like C-terminal
GRMZM2G005493	0.00921316	-0.347956	normal	2.12401e-63	1.06776	up	3.1626e-11	0.707329	normal	3.15285e-06	0.311468	normal	0.839271	-0.0295899	normal	Xylose isomerase-like TIM barrel
GRMZM2G005516	4.19643e-05	1.35612	up	1.45302e-06	2.13695	up	9.44111e-20	3.51701	up	0.00213107	1.7564	up	6.80004e-10	3.17255	up	Tubulin C-terminal domain
GRMZM2G005526	0.576341	0.235213	normal	3.7393e-30	-2.68019	down	3.35777e-25	-2.45471	down	0.0404547	-0.867545	normal	0.141784	-0.640263	normal	Iron/manganese superoxide dismutases, alpha-hairpin domain
GRMZM2G005536	0.385037	-0.387121	normal	0.100911	-0.592628	normal	0.00136969	-1.00502	down	0.175288	0.633494	normal	0.580489	0.264539	normal	DNA polymerase subunit Cdc27
GRMZM2G005592	5.08549e-10	-1.05248	down	0.0018497	0.327311	normal	6.67973e-06	-0.737315	normal	0.966062	-0.00562609	normal	1.88255e-11	-1.05405	down	Guanylate-binding protein, N-terminal domain
GRMZM2G005622	5.74593e-08	1.11199	up	1.74799e-19	-1.23215	down	0.572016	-0.119552	normal	0.521232	-0.134418	normal	2.73568e-07	0.993375	normal	--
GRMZM2G005624	--	--	--	1.29092e-05	-1.85076	down	0.000544508	-1.51133	down	--	--	--	--	--	--	Homeodomain
GRMZM2G005630	0.0003221	-1.30273	down	0.00226425	-0.774888	normal	3.78631e-13	-2.10273	down	0.482057	-0.237173	normal	3.07271e-06	-1.55642	down	--
GRMZM2G005633	0.440972	0.434254	normal	0.00962841	1.26663	up	1.21779e-26	1.85371	up	0.922029	-0.0604325	normal	0.0690901	0.411618	normal	Chitinase class I
GRMZM2G005640	2.09804e-83	10.1533	up	--	--	--	8.7285e-163	6.16449	up	--	--	--	9.9081e-67	10.6446	up	Ribosomal family S4e
GRMZM2G005641	0.226828	-0.543009	normal	1.30193e-13	5.00049	up	4.84417e-10	4.58203	up	1.31306e-06	3.15527	up	0.000690894	2.69932	up	Synaptobrevin
GRMZM2G005680	0.983286	-0.00502792	normal	8.27876e-25	-1.26202	down	5.74644e-20	-1.27477	down	1.22461e-05	-0.644884	normal	5.29533e-05	-0.642886	normal	Glycosyltransferase family 29 (sialyltransferase)
GRMZM2G005710	6.70259e-59	-3.24791	down	4.93698e-11	1.00373	up	1.24703e-31	-2.26399	down	1.86542e-05	0.729564	normal	2.03856e-31	-2.52337	down	Glutathione S-transferase, N-terminal domain
GRMZM2G005749	0.00022579	1.45689	up	0.326871	-0.461638	normal	0.000975504	1.00376	up	5.4881e-06	-1.73363	down	0.411276	-0.276181	normal	Complex1_LYR-like
GRMZM2G005815	0.000649169	-1.57719	down	7.3063e-13	4.31538	up	--	--	--	0.136488	0.734294	normal	--	--	--	HSF-type DNA-binding
GRMZM2G005848	8.70806e-05	-0.632127	normal	0.0132244	0.296518	normal	0.00913856	-0.346724	normal	1.72155e-22	1.22958	up	4.54053e-05	0.604826	normal	Dynamin family
GRMZM2G005869	0.412182	-0.18705	normal	2.49597e-12	1.28957	up	2.92711e-07	1.09088	up	0.396618	-0.175776	normal	0.112141	-0.35536	normal	Protein kinase domain
GRMZM2G005886	--	--	--	2.72349e-08	-2.34064	down	1.74936e-05	-1.95817	down	--	--	--	--	--	--	Mycolic acid cyclopropane synthetase
GRMZM2G005909	0.262352	0.44185	normal	0.077108	0.729243	normal	0.0055676	1.15393	up	0.481746	-0.27249	normal	0.644797	0.18095	normal	Polyprenyl synthetase
GRMZM2G005939	3.05036e-08	-1.28576	down	0.866681	-0.0303479	normal	9.94412e-17	-1.34001	down	4.17492e-10	0.977731	normal	0.113519	-0.316497	normal	--
GRMZM2G006006	0.200991	0.25231	normal	3.48646e-28	-1.32343	down	3.91466e-13	-1.07619	down	0.803094	0.0587693	normal	0.148031	0.319646	normal	Protein of unknown function (DUF3531)
GRMZM2G006119	0.17275	-0.325128	normal	1.1177e-19	1.24918	up	2.33578e-10	0.911959	normal	0.503117	-0.181032	normal	0.00241646	-0.504469	normal	short chain dehydrogenase
GRMZM2G006121	0.000830654	0.763335	normal	8.34979e-10	-1.20234	down	0.025387	-0.447321	normal	0.0308001	-0.561626	normal	0.413258	0.209311	normal	--
GRMZM2G006130	6.06944e-07	-0.635473	normal	5.29018e-07	0.407163	normal	0.0238394	-0.238958	normal	2.89617e-41	-1.02529	down	4.44248e-59	-1.65357	down	Alpha-L-arabinofuranosidase C-terminal domain
GRMZM2G006207	--	--	--	1.53223e-16	-5.06835	down	0.00260016	-1.51099	down	--	--	--	--	--	--	14-3-3 protein
GRMZM2G006216	3.28529e-05	0.650982	normal	0.0505867	0.349551	normal	4.73578e-10	0.99218	normal	0.00960113	0.508312	normal	1.6596e-11	1.17083	up	Lysine methyltransferase
GRMZM2G006219	0.0377726	-0.280236	normal	4.33504e-11	-0.503888	normal	2.03811e-13	-0.792312	normal	9.44574e-39	1.09064	up	2.44405e-12	0.817346	normal	MSP (Major sperm protein) domain
GRMZM2G006229	0.29457	-0.492213	normal	0.0024085	-0.900068	normal	9.54723e-06	-1.41083	down	0.996235	-0.00220281	normal	0.252135	-0.499134	normal	--
GRMZM2G006234	0.310274	0.420314	normal	0.127318	0.710714	normal	0.00440243	1.13841	up	0.877615	0.0904639	normal	0.234755	0.525664	normal	PPR repeat family
GRMZM2G006246	0.00747944	0.537491	normal	0.00367715	0.608187	normal	5.36684e-11	1.1415	up	0.476325	0.193518	normal	0.000608176	0.74238	normal	FHA domain
GRMZM2G006252	0.149242	0.6686	normal	0.108818	0.919421	normal	0.00102288	1.60596	up	0.267593	-0.560595	normal	0.800761	0.112257	normal	Plants and Prokaryotes Conserved (PCC) domain
GRMZM2G006293	1.13398e-12	1.35762	up	7.73994e-100	-2.18238	down	1.45267e-07	-0.81694	normal	1.12285e-26	-1.32437	down	0.802477	0.0534965	normal	Ubiquitin family
GRMZM2G006325	0.0435679	-0.957103	normal	2.17145e-23	3.11543	up	0.000167949	1.97088	up	0.000442547	0.963667	normal	0.955845	-0.0352608	normal	--
GRMZM2G006363	6.9808e-05	1.58971	up	0.34994	-0.477668	normal	0.00687599	1.08833	up	--	--	--	2.97246e-07	2.28061	up	--
GRMZM2G006399	0.306902	-0.293111	normal	2.03293e-09	2.13042	up	4.76266e-06	1.82656	up	0.175344	0.498938	normal	0.611203	0.221048	normal	Zinc finger, C3HC4 type (RING finger)
GRMZM2G006428	1.67075e-07	-0.698086	normal	0.000268991	-0.39122	normal	7.30172e-17	-1.09771	down	0.835675	0.030491	normal	2.15402e-06	-0.660123	normal	IBR domain, a half RING-finger domain
GRMZM2G006450	1.19065e-13	4.63406	up	8.18556e-11	-4.10564	down	0.260094	0.454485	normal	2.70971e-14	-4.76007	down	0.831752	-0.102548	normal	Ribosomal L18 of archaea, bacteria, mitoch. and chloroplast
GRMZM2G006468	1.68297e-11	-1.40972	down	1.5488e-09	0.827026	normal	0.0100031	-0.598041	normal	0.000279168	-0.512396	normal	3.01555e-20	-1.91896	down	Domain of unknown function (DUF151)
GRMZM2G006526	0.0366738	0.770415	normal	0.280191	-0.39938	normal	0.192689	0.369849	normal	0.00238888	-1.03475	down	0.398774	-0.257353	normal	Apoptosis antagonizing transcription factor
GRMZM2G006562	--	--	--	--	--	--	--	--	--	5.6638e-05	-1.81905	down	2.22917e-05	-2.65493	down	LysM domain
GRMZM2G006585	5.58641e-249	4.27963	up	0	-3.43417	down	4.78205e-15	0.850305	normal	0.0728716	0.30964	normal	8.59852e-280	4.60762	up	PLATZ transcription factor
GRMZM2G006672	0.226939	0.337874	normal	0.000502504	0.880928	normal	2.09009e-06	1.21088	up	0.30417	0.30442	normal	0.0190309	0.654244	normal	Isocitrate/isopropylmalate dehydrogenase
GRMZM2G006673	0.16663	0.249773	normal	8.63782e-17	0.900272	normal	1.17798e-13	1.13679	up	0.230508	-0.130739	normal	0.444157	0.129013	normal	THO complex subunit 1 transcription elongation factor
GRMZM2G006704	2.35907e-05	1.29469	up	1.31106e-10	-1.17068	down	0.655872	0.141865	normal	2.25361e-11	-1.27759	down	0.877207	0.0546697	normal	--
GRMZM2G006714	0.101164	-0.627514	normal	0.00949209	1.01965	up	0.397614	0.392616	normal	0.639248	0.210368	normal	0.337833	-0.41155	normal	Calmodulin binding protein-like
GRMZM2G006753	8.19834e-05	2.67071	up	--	--	--	0.170742	1.20951	normal	--	--	--	1.88212e-05	3.02136	up	--
GRMZM2G006790	1.19637e-21	1.72439	up	1.52585e-75	-1.6839	down	0.816313	0.047791	normal	5.00318e-12	-0.76919	normal	1.39104e-08	0.975407	normal	EF-hand domain pair
GRMZM2G006853	1.00836e-13	-5.18503	down	0.169344	0.619079	normal	--	--	--	0.00161858	1.80949	up	--	--	--	Thaumatin family
GRMZM2G006937	0.116513	0.30101	normal	1.5062e-15	0.823807	normal	1.16789e-11	1.11119	up	0.29986	0.127811	normal	0.0123414	0.438214	normal	Squalene-hopene cyclase C-terminal domain
GRMZM2G006942	0.000808148	0.537978	normal	5.15361e-47	-1.3998	down	7.72474e-12	-0.866564	normal	4.47974e-06	0.577985	normal	4.3871e-16	1.1267	up	Exocyst component 84 C-terminal
GRMZM2G006948	1.19553e-08	-1.05133	down	0.430604	0.0721947	normal	1.92079e-08	-0.990048	normal	4.06586e-09	0.635468	normal	0.0486262	-0.414965	normal	--
GRMZM2G006977	0.135737	-0.474113	normal	0.0308903	0.432949	normal	0.861408	-0.0574607	normal	0.000974273	-0.621558	normal	1.96374e-05	-1.09187	down	Cation transporting ATPase, C-terminus
GRMZM2G007028	0.704934	0.228795	normal	--	--	--	--	--	--	0.00770949	-1.21257	down	0.0280559	-0.997347	normal	Zinc-finger domain of monoamine-oxidase A repressor R1
GRMZM2G007055	0.0075415	1.23655	up	0.396655	0.4371	normal	1.75052e-07	1.73662	up	0.0138143	1.35359	normal	3.12364e-11	2.72927	up	--
GRMZM2G007060	0.000514639	-0.698391	normal	1.86654e-10	-0.741259	normal	1.68761e-18	-1.44735	down	0.665696	0.0777878	normal	0.00182028	-0.615373	normal	Interferon-related developmental regulator (IFRD)
GRMZM2G007080	3.00284e-28	2.32086	up	7.10103e-29	-2.37273	down	0.767332	-0.0662341	normal	8.18002e-27	-2.35943	down	0.882512	-0.0334877	normal	Tim17/Tim22/Tim23/Pmp24 family
GRMZM2G007122	0.0012552	0.553545	normal	2.36202e-23	-1.07976	down	0.000296821	-0.530987	normal	3.41801e-06	-0.612079	normal	0.813723	-0.0484745	normal	Ubiquitin-conjugating enzyme
GRMZM2G007130	0.156664	-0.480773	normal	0.504656	-0.198467	normal	0.00571529	-0.696744	normal	0.0137567	-0.680937	normal	2.75791e-06	-1.17048	down	Cyclin, N-terminal domain
GRMZM2G007151	1.29738e-57	-2.78369	down	0	5.22958	up	1.66675e-31	2.38192	up	0	4.47229	up	6.50254e-15	1.66141	up	DREPP plasma membrane polypeptide
GRMZM2G007190	0.129021	-0.322159	normal	5.46882e-05	0.752351	normal	0.0325429	0.421906	normal	9.23824e-10	1.26332	up	8.72262e-06	0.955143	normal	MYND finger
GRMZM2G007248	0.109644	-0.647979	normal	0.0428504	0.806153	normal	0.753545	0.155415	normal	0.237014	-0.452932	normal	0.00221906	-1.10998	down	PPR repeat family
GRMZM2G007249	0.0097634	1.38651	up	0.00120789	-1.63047	down	0.599769	-0.270497	normal	--	--	--	0.476434	0.467654	normal	2OG-Fe(II) oxygenase superfamily
GRMZM2G007252	1.45976e-08	-0.575072	normal	1.99404e-08	0.426195	normal	0.149194	-0.158429	normal	9.28116e-65	-1.02572	down	6.86298e-80	-1.59329	down	3-beta hydroxysteroid dehydrogenase/isomerase family
GRMZM2G007256	0.0136551	-0.701031	normal	6.11358e-71	9.24329	up	9.96244e-49	8.51661	up	6.24633e-158	6.18803	up	3.18212e-52	5.4188	up	Cysteine-rich TM module stress tolerance
GRMZM2G007258	0.6713	-0.118948	normal	1.89952e-09	1.44675	up	2.28822e-07	1.31939	up	0.0600742	0.486517	normal	0.173476	0.377436	normal	--
GRMZM2G007277	0.516399	0.277449	normal	0.0179585	1.04094	normal	0.00204458	1.31595	up	0.00138629	-1.04428	down	0.0168836	-0.765274	normal	Alkaline and neutral invertase
GRMZM2G007283	0.001438	0.442121	normal	7.92363e-45	-1.20786	down	1.60014e-13	-0.772476	normal	1.47597e-07	0.630282	normal	1.02225e-17	1.08244	up	Protein tyrosine and serine/threonine kinase
GRMZM2G007288	0.394516	0.313087	normal	0.694868	0.136741	normal	0.211104	0.440319	normal	1.30399e-24	-2.08243	down	1.92491e-12	-1.75404	down	--
GRMZM2G007372	1.77942e-19	-2.21917	down	5.55549e-27	2.34943	up	0.798068	0.110094	normal	1.38847e-23	2.62305	up	0.398953	0.409353	normal	PPR repeat family
GRMZM2G007426	--	--	--	5.15952e-106	-10.6835	down	4.95186e-260	-7.40636	down	--	--	--	--	--	--	--
GRMZM2G007453	2.02536e-40	-2.33435	down	0.506589	-0.0921647	normal	5.60937e-48	-2.43806	down	0.130478	0.262326	normal	3.38628e-22	-2.0656	down	APO RNA-binding
GRMZM2G007475	0.589262	0.223358	normal	0.00507235	0.955437	normal	0.00162898	1.16537	up	0.0744371	0.64047	normal	0.0177464	0.878293	normal	Domain of unknown function (DUF588)
GRMZM2G007477	9.00039e-10	-1.88648	down	0.038258	0.614651	normal	0.000282912	-1.27373	down	8.91574e-08	1.87656	up	0.980223	0.0152943	normal	Protein kinase domain
GRMZM2G007481	0.0431336	-0.844027	normal	0.995737	0.00230766	normal	0.0244254	-0.858458	normal	0.31246	-0.471261	normal	0.00459433	-1.31441	down	Membrane transport protein
GRMZM2G007489	4.34046e-07	-0.719641	normal	4.67317e-09	-0.556855	normal	2.80022e-28	-1.28656	down	0.00117449	-0.339671	normal	1.39316e-17	-1.05317	down	Acyl-ACP thioesterase
GRMZM2G007514	0.0197259	0.647222	normal	0.00437788	0.86845	normal	9.46902e-07	1.50266	up	8.82231e-14	3.02588	up	5.30793e-21	3.73877	up	--
GRMZM2G007546	3.24114e-14	-5.2745	down	0.016037	1.2967	normal	--	--	--	0.326651	0.497948	normal	4.03842e-10	-5.26015	down	Beta-lactamase superfamily domain
GRMZM2G007628	0.761095	0.120911	normal	1.73773e-22	6.086	up	1.65887e-22	6.32367	up	3.34602e-12	3.10335	up	2.38177e-13	3.30906	up	--
GRMZM2G007651	1.27677e-06	-0.827856	normal	5.6813e-29	1.90642	up	6.06612e-07	1.06495	up	3.84616e-07	0.818905	normal	0.990974	-0.00279688	normal	Protein of unknown function (DUF2470)
GRMZM2G007680	1.58905e-11	-1.45462	down	1.44953e-10	1.25361	up	0.489381	-0.208892	normal	5.53344e-12	1.22473	up	0.411808	-0.228779	normal	--
GRMZM2G007715	0.000941639	2.33229	up	2.27781e-15	-5.57248	down	0	-6.10306	down	1.80945e-05	-2.74411	down	0.488295	-0.312061	normal	Lyase
GRMZM2G007729	0.128017	0.484513	normal	0.128814	0.546893	normal	2.32335e-09	1.05193	up	0.897708	0.0635921	normal	0.00771267	0.567306	normal	Hsp20/alpha crystallin family
GRMZM2G007736	--	--	--	--	--	--	--	--	--	0.00217835	-1.6514	down	0.00499876	-1.62955	down	Glycosyltransferase family 20
GRMZM2G007791	6.21738e-12	-1.34789	down	0.924333	-0.0167444	normal	3.08959e-14	-1.3767	down	0.0753183	0.361529	normal	4.16275e-05	-0.979407	normal	Piwi domain
GRMZM2G007835	6.80352e-13	1.2986	up	1.1771e-07	-0.56942	normal	5.58759e-05	0.726036	normal	0.00307463	-0.365712	normal	2.40901e-07	0.947209	normal	Zinc-finger of C2H2 type
GRMZM2G007909	0.0082545	2.01637	up	0.0262552	-1.81748	normal	0.0037687	-0.849478	normal	--	--	--	0.0566217	1.55454	normal	Nucleotide-sugar transporter
GRMZM2G007914	0.950752	0.015302	normal	0.294704	0.189993	normal	0.372373	0.194924	normal	3.24837e-10	1.26966	up	1.41131e-08	1.29622	up	--
GRMZM2G007933	0.00162689	0.6606	normal	3.46064e-05	0.853921	normal	8.07862e-16	1.50943	up	0.703178	0.105809	normal	0.000497053	0.776525	normal	--
GRMZM2G007939	0.00958235	-0.752971	normal	1.20571e-05	1.06917	up	0.152819	0.306961	normal	0.0337333	0.558794	normal	0.416107	-0.194759	normal	Glycosyl hydrolase family 14
GRMZM2G007981	0.000289954	0.575503	normal	3.35721e-16	-1.09333	down	0.0004014	-0.52558	normal	0.127847	0.344667	normal	9.36173e-06	0.928244	normal	Galactose oxidase, central domain
GRMZM2G008060	5.05278e-09	1.57058	up	2.83335e-22	-1.75795	down	0.528298	-0.172599	normal	0.00568583	-0.680746	normal	0.000428632	0.91416	normal	Tetratricopeptide repeat
GRMZM2G008072	1.27559e-13	-3.37474	down	0.00156514	1.13694	up	--	--	--	0.290027	0.4263	normal	5.39034e-08	-2.97512	down	Protein of unknown function (DUF1336)
GRMZM2G008106	0.00363775	1.49046	up	--	--	--	0.014039	1.19516	normal	--	--	--	0.0341221	1.12383	normal	Plastocyanin-like domain
GRMZM2G008108	0.0926796	-0.784233	normal	0.000470099	-1.19721	down	9.85506e-09	-2.01101	down	0.305606	-0.491491	normal	0.00451408	-1.29201	down	--
GRMZM2G008209	0.684573	-0.107164	normal	0.0147914	0.55047	normal	0.0692332	0.435386	normal	9.06182e-30	-1.78175	down	4.03867e-28	-1.88395	down	DNA / pantothenate metabolism flavoprotein
GRMZM2G008226	0.0093559	-0.616922	normal	1.47892e-10	0.952384	normal	0.228228	0.315538	normal	0.000202216	-0.581495	normal	2.68054e-07	-1.19068	down	Glycosyltransferase family 20
GRMZM2G008247	8.53429e-16	2.57942	up	0.507103	-0.358621	normal	1.03856e-14	2.21372	up	--	--	--	3.91685e-15	2.95503	up	Glycosyl hydrolase family 1
GRMZM2G008271	0.00011908	-1.44084	down	3.13382e-14	2.90749	up	0.0119504	1.39544	normal	0.0112135	-0.746699	normal	2.7608e-09	-2.19708	down	Basal layer antifungal peptide (BAP)
GRMZM2G008309	0.238648	0.552613	normal	1.29934e-07	3.18315	up	5.23864e-10	3.74501	up	1.78974e-10	-1.96895	down	0.000142628	-1.39427	down	Cotton fibre expressed protein
GRMZM2G008353	2.01005e-05	-2.14722	down	0.327591	0.375761	normal	0.000892998	-1.78067	down	0.00030658	-1.03923	down	3.85126e-14	-3.27107	down	Phosphate-induced protein 1 conserved region
GRMZM2G008369	1.49333e-19	3.48383	up	2.25501e-25	-3.57621	down	0.850711	-0.0685632	normal	0.00015468	-1.97871	down	0.000149022	1.45096	up	GTP1/OBG
GRMZM2G008403	7.42104e-32	-7.12786	down	5.14486e-13	2.92083	up	--	--	--	1.42903e-07	2.33041	up	--	--	--	Basal layer antifungal peptide (BAP)
GRMZM2G008501	0.192933	-0.22475	normal	1.25123e-11	-0.785256	normal	4.55326e-15	-1.01898	down	0.0968786	-0.290175	normal	0.00683322	-0.50752	normal	Glycosyl transferase family 8
GRMZM2G008507	0.793259	0.106517	normal	3.42203e-05	1.40751	up	1.11408e-06	1.52205	up	0.057735	0.686348	normal	0.011549	0.813837	normal	Glycosyl transferases group 1
GRMZM2G008539	5.20796e-08	-1.95906	down	0.000476511	1.38199	up	0.338903	-0.535229	normal	0.000741553	1.28428	up	0.209928	-0.660203	normal	UDP-glucoronosyl and UDP-glucosyl transferase
GRMZM2G008558	8.01888e-07	1.59621	up	0.116942	-0.622292	normal	0.00222709	0.958182	normal	0.772779	0.185756	normal	3.90624e-05	1.78306	up	Protein of unknown function, DUF573
GRMZM2G008583	--	--	--	--	--	--	--	--	--	0.231793	-1.08464	normal	0.000149069	-2.28407	down	Leucine rich repeat
GRMZM2G008611	2.17109e-29	3.15789	up	2.33923e-11	-1.91064	down	1.13547e-07	1.24772	up	9.85629e-26	-2.75258	down	0.0895036	0.436999	normal	RNA recognition motif. (a.k.a. RRM, RBD, or RNP domain)
GRMZM2G008622	0.000238988	-0.708157	normal	2.84355e-19	1.71054	up	5.11919e-06	0.994558	normal	0.950766	0.0132896	normal	2.72682e-05	-0.690575	normal	Plant protein of unknown function (DUF639)
GRMZM2G008638	0.0442951	-0.412007	normal	2.17722e-08	-0.601688	normal	2.37075e-09	-1.02062	down	0.0187058	-0.320482	normal	0.00015226	-0.724996	normal	Syntaxin 6, N-terminal
GRMZM2G008642	0.0335583	-0.675838	normal	0.0406562	0.654336	normal	0.949696	-0.0268781	normal	0.191716	-0.419386	normal	0.000551186	-1.09522	down	Triose-phosphate Transporter family
GRMZM2G008647	7.45835e-80	8.62792	up	--	--	--	2.19239e-102	4.91564	up	--	--	--	2.74588e-69	8.89082	up	Thioredoxin
GRMZM2G008657	0.00240756	1.13789	up	0.723507	0.233027	normal	0.0165602	1.30015	normal	0.944622	-0.0495421	normal	0.0231493	1.08579	normal	Ctf8
GRMZM2G008691	0.259706	0.603046	normal	--	--	--	0.00456458	1.53312	up	--	--	--	0.00915973	1.62166	up	Helix-loop-helix DNA-binding domain
GRMZM2G008728	0.550681	-0.15405	normal	0.0490298	0.273222	normal	0.636065	0.107634	normal	3.25127e-10	1.05125	up	6.95198e-05	0.901857	normal	Zinc-binding dehydrogenase
GRMZM2G008730	0.10134	-0.504155	normal	1.2365e-05	1.34689	up	0.0170158	0.836627	normal	0.0241271	0.812366	normal	0.453355	0.32672	normal	Chlorophyll A-B binding protein
GRMZM2G008773	--	--	--	8.05683e-17	-3.29746	down	2.11667e-06	-1.89966	down	1.71258e-09	-2.82627	down	0.00180033	-1.47226	down	LysM domain
GRMZM2G008792	0.00294748	-0.742468	normal	1.14047e-07	-0.893799	normal	4.27343e-15	-1.64461	down	7.21302e-22	3.05485	up	2.54546e-09	2.3331	up	Cytokinin dehydrogenase 1, FAD and cytokinin binding
GRMZM2G008864	--	--	--	1.09e-15	-5.31782	down	3.79938e-15	-5.4415	down	--	--	--	--	--	--	Electron transfer flavoprotein domain
GRMZM2G008892	0.323682	-0.56371	normal	0.000227988	1.85014	up	--	--	--	0.721797	0.203799	normal	0.515754	-0.368351	normal	Oxygen evolving enhancer protein 3 (PsbQ)
GRMZM2G008898	0.289726	0.534544	normal	0.000489875	1.81913	up	3.18348e-07	2.4047	up	0.572084	0.386797	normal	0.142123	0.932016	normal	Helix-loop-helix DNA-binding domain
GRMZM2G008913	2.57898e-10	-0.887888	normal	0.384781	-0.063157	normal	6.35971e-16	-0.961641	normal	0.00417641	-0.191618	normal	7.65802e-19	-1.07366	down	Zein seed storage protein
GRMZM2G008972	--	--	--	2.99224e-10	-4.01974	down	0.00202886	-1.55476	down	--	--	--	--	--	--	PPPDE putative peptidase domain
GRMZM2G009030	0.014813	-0.428315	normal	0.143793	0.206422	normal	0.145628	-0.232376	normal	1.23016e-15	-0.973314	normal	3.62677e-23	-1.39599	down	Enolase, C-terminal TIM barrel domain
GRMZM2G009045	4.48969e-17	-5.69669	down	4.81576e-13	4.09972	up	--	--	--	3.49406e-05	2.1633	up	--	--	--	Mitochondrial carrier protein
GRMZM2G009080	2.05513e-10	2.68407	up	5.32249e-11	-2.75997	down	0.784111	-0.108672	normal	0.00288894	-1.68295	down	0.0131907	0.952054	normal	zinc-finger of the FCS-type, C2-C2
GRMZM2G009103	0.0477474	0.860174	normal	--	--	--	1.30925e-05	2.7643	up	--	--	--	1.64655e-12	5.73035	up	EamA-like transporter family
GRMZM2G009114	--	--	--	--	--	--	--	--	--	1.93218e-32	-7.26469	down	1.84698e-29	-7.06038	down	Thiolase, N-terminal domain
GRMZM2G009117	0.754705	0.188139	normal	--	--	--	0.00128243	2.03769	up	0.390715	-0.516248	normal	0.563528	-0.339866	normal	--
GRMZM2G009125	2.0624e-09	4.44099	up	--	--	--	8.28358e-09	4.32676	up	--	--	--	1.8819e-08	4.88185	up	UDP-glucoronosyl and UDP-glucosyl transferase
GRMZM2G009144	0.152676	-0.281808	normal	0.00197983	-0.482037	normal	2.12148e-06	-0.772815	normal	6.79294e-17	1.87342	up	1.08933e-11	1.60897	up	--
GRMZM2G009157	0.0302214	-0.644392	normal	6.30004e-30	6.77421	up	2.06536e-22	6.30142	up	0.00154303	2.6225	up	5.6918e-07	3.31356	up	Ulp1 protease family, C-terminal catalytic domain
GRMZM2G009223	1.09191e-06	0.980224	normal	0.0355795	0.468469	normal	3.0337e-16	1.44612	up	3.75948e-07	1.61407	up	7.25101e-19	2.61713	up	Triose-phosphate Transporter family
GRMZM2G009265	0.00527768	0.891633	normal	0.0256514	0.757541	normal	7.44129e-06	1.62271	up	0.00822065	0.822474	normal	4.59957e-08	1.735	up	Seven in absentia protein family
GRMZM2G009326	1.37879e-05	0.719414	normal	0.000771083	-0.342571	normal	0.00832648	0.371276	normal	1.42508e-05	0.50999	normal	7.15685e-18	1.24136	up	GRAM domain
GRMZM2G009344	0.0081299	-0.897981	normal	8.04522e-18	1.99414	up	0.00771951	1.0386	up	0.00747973	0.617958	normal	0.48749	-0.286883	normal	Purine nucleobase transmembrane transport
GRMZM2G009368	0.0613977	-1.01548	normal	2.19576e-36	1.18441	up	0.943748	0.0443188	normal	6.16375e-56	1.63781	up	0.411808	0.485308	normal	Natural resistance-associated macrophage protein
GRMZM2G009412	0.000142027	0.651651	normal	1.11496e-08	0.61321	normal	1.71198e-16	1.25458	up	0.0680569	-0.240208	normal	0.0198346	0.421784	normal	Ribosomal protein L44
GRMZM2G009413	0.0589829	0.365363	normal	3.42214e-25	1.91912	up	1.35916e-28	2.27143	up	0.213202	0.204457	normal	0.000438944	0.57945	normal	KH domain
GRMZM2G009438	1.93379e-103	7.68596	up	2.32661e-44	-5.62036	down	4.16726e-39	2.03184	up	--	--	--	2.31227e-54	9.84751	up	Protein DA1
GRMZM2G009442	1.29756e-11	-4.29848	down	6.63718e-19	5.71103	up	--	--	--	0.0899118	1.50354	normal	--	--	--	--
GRMZM2G009462	1.38352e-91	5.57578	up	1.26724e-13	-2.86279	down	5.21038e-60	2.65592	up	6.80417e-27	-3.75216	down	2.73798e-29	1.80784	up	PWI domain
GRMZM2G009465	--	--	--	3.13715e-72	-9.30795	down	9.89994e-74	-8.97278	down	--	--	--	--	--	--	Pollen protein Ole e 1 like
GRMZM2G009479	1.88044e-10	1.37773	up	0.819279	-0.0554774	normal	1.13008e-16	1.3244	up	5.42284e-05	1.0314	up	1.00473e-29	2.43436	up	Lipoxygenase
GRMZM2G009588	1.16272e-05	2.85832	up	--	--	--	2.13997e-14	5.3388	up	--	--	--	1.18235e-13	5.95592	up	Oxysterol-binding protein
GRMZM2G009627	3.67523e-27	2.15808	up	0.26105	0.262317	normal	1.82101e-52	2.42686	up	0.00819967	-0.557871	normal	1.60076e-25	1.62415	up	WD domain, G-beta repeat
GRMZM2G009633	0.961595	0.0303216	normal	7.99419e-08	-1.77699	down	1.71512e-10	-1.78711	down	--	--	--	0.00047364	2.5334	up	Eukaryotic-type carbonic anhydrase
GRMZM2G009638	2.76178e-11	1.19068	up	6.12865e-19	-0.917353	normal	0.111172	0.272547	normal	7.78659e-08	-0.608897	normal	0.000285048	0.598626	normal	ATP synthase
GRMZM2G009661	0.0212446	0.495172	normal	1.73806e-15	-1.14445	down	1.633e-06	-0.65596	normal	0.000314046	-0.61422	normal	0.575599	-0.107762	normal	Protein phosphatase 2A regulatory B subunit (B56 family)
GRMZM2G009681	0.000602876	-0.715973	normal	5.56769e-06	1.13284	up	0.198991	0.414097	normal	0.0532279	-0.39685	normal	1.96142e-07	-1.1073	down	NAD dependent epimerase/dehydratase family
GRMZM2G009715	0.00154606	-0.670504	normal	1.63107e-18	-0.83864	normal	1.33266e-16	-1.51227	down	0.000641288	0.527705	normal	0.615116	-0.137768	normal	Sodium/hydrogen exchanger family
GRMZM2G009719	0.36191	0.396145	normal	0.00422603	-1.26513	down	1.24664e-05	-0.953646	normal	0.479614	0.253929	normal	0.0086126	0.675087	normal	Universal stress protein family
GRMZM2G009724	2.2412e-12	-2.71715	down	0.0320732	0.594553	normal	2.7062e-06	-2.1087	down	2.36218e-05	1.30137	up	0.00914623	-1.42167	down	BTB/POZ domain
GRMZM2G009795	0.00260643	0.733963	normal	0.00470034	0.784751	normal	1.4705e-09	1.51153	up	0.559272	-0.176848	normal	0.0191637	0.567736	normal	--
GRMZM2G009804	0.141574	0.566756	normal	0.276674	-0.361688	normal	0.597498	0.20055	normal	0.0942061	0.781359	normal	0.00200229	1.37001	up	Glutaredoxin
GRMZM2G009854	5.40995e-23	-2.4407	down	0.113459	0.341664	normal	4.71403e-23	-2.12459	down	0.111078	-0.32741	normal	2.70878e-49	-2.79724	down	--
GRMZM2G009869	6.70476e-07	2.14798	up	--	--	--	4.46279e-15	5.40979	up	--	--	--	0.000107214	1.97999	up	Protein kinase domain
GRMZM2G009876	4.4831e-13	1.20033	up	0.288237	-0.147532	normal	5.67605e-13	1.04736	up	5.95139e-08	-0.730555	normal	0.00457625	0.482801	normal	Ribosomal protein S8e
GRMZM2G009892	0.808148	0.154482	normal	1.77811e-05	2.24032	up	1.85973e-07	2.47693	up	0.194472	0.751988	normal	0.0748864	0.94958	normal	No apical meristem (NAM) protein
GRMZM2G009901	0.000878445	0.946622	normal	0.153087	-0.466749	normal	0.101211	0.467588	normal	7.61002e-05	-1.20622	down	0.414003	-0.260405	normal	Plant protein of unknown function (DUF868)
GRMZM2G009913	0.000195338	1.38334	up	0.762042	-0.169964	normal	0.00139441	1.19735	up	0.414078	0.617663	normal	0.000966303	1.99961	up	Mad3/BUB1 homology region 1
GRMZM2G009958	0.0100629	0.818129	normal	4.02066e-14	3.09762	up	5.68041e-26	3.94994	up	2.38749e-07	-1.28753	down	0.0943804	-0.453384	normal	--
GRMZM2G009987	3.02693e-16	5.57726	up	--	--	--	4.29552e-15	5.44276	up	1.47909e-39	-7.78855	down	6.86792e-13	-2.11353	down	ATPase family associated with various cellular activities (AAA)
GRMZM2G010016	--	--	--	--	--	--	0.539235	-0.35842	normal	0.000572321	-2.26583	down	0.0160363	-1.25869	normal	Domain of unknown function (DUF4228)
GRMZM2G010046	--	--	--	--	--	--	--	--	--	0.189803	-0.762308	normal	0.000451423	-2.14766	down	PPR repeat
GRMZM2G010052	0.000192383	1.6027	up	0.0231387	-1.1246	normal	0.300408	0.437535	normal	--	--	--	0.207887	0.616733	normal	Iron hydrogenase small subunit
GRMZM2G010061	1.18551e-09	2.34768	up	--	--	--	1.51316e-21	6.23328	up	--	--	--	1.71661e-12	4.28344	up	Domain of unknown function (DUF1771)
GRMZM2G010097	1.98466e-18	5.8449	up	--	--	--	4.50749e-17	5.70376	up	--	--	--	5.36588e-16	6.32399	up	Gamma-thionin family
GRMZM2G010105	0.115607	-0.416233	normal	0.00732126	0.664377	normal	0.441982	0.239879	normal	6.72063e-14	-1.34079	down	3.76147e-17	-1.75369	down	Chromatin assembly factor 1 subunit A
GRMZM2G010136	0.903232	0.0403209	normal	0.000108232	1.0731	up	2.12334e-05	1.11138	up	0.102332	0.460382	normal	0.0307535	0.514555	normal	F-actin capping protein alpha subunit
GRMZM2G010149	0.645583	0.234599	normal	0.0175734	1.20041	normal	0.00278296	1.44628	up	0.312166	-0.516545	normal	0.59977	-0.282974	normal	--
GRMZM2G010163	3.59231e-32	-7.2036	down	1.18593e-32	7.01414	up	--	--	--	6.21744e-33	4.68861	up	--	--	--	--
GRMZM2G010211	3.91648e-09	2.45002	up	--	--	--	1.06403e-17	5.30397	up	--	--	--	3.07739e-12	3.44382	up	Class-II DAHP synthetase family
GRMZM2G010221	0.0945383	-0.317341	normal	0.000737629	0.560083	normal	0.25538	0.233678	normal	8.72616e-08	-0.731694	normal	2.49438e-11	-1.04214	down	Cytochrome P450
GRMZM2G010282	1.05991e-06	-3.15468	down	8.48013e-07	2.77691	up	--	--	--	0.0192644	0.912398	normal	0.0029535	-2.38452	down	Myb/SANT-like DNA-binding domain
GRMZM2G010286	1.44156e-24	-6.51105	down	1.29185e-24	6.30969	up	--	--	--	2.01624e-24	6.56874	up	--	--	--	Ham1 family
GRMZM2G010290	3.59502e-08	-2.5102	down	0.000268689	1.54279	up	--	--	--	0.0152328	1.08851	normal	0.00657506	-1.45458	down	Dof domain, zinc finger
GRMZM2G010298	1.72301e-07	0.838505	normal	2.10762e-55	-1.713	down	8.72418e-14	-0.87975	normal	4.3515e-31	-1.51533	down	1.01283e-05	-0.666558	normal	Protein phosphatase 2C
GRMZM2G010321	0.173809	0.397614	normal	2.97572e-14	-1.07082	down	0.00192641	-0.670914	normal	0.0164849	-0.432419	normal	0.94447	-0.0213513	normal	Glycine cleavage H-protein
GRMZM2G010353	0.169212	0.604548	normal	0.197666	0.599568	normal	0.00603457	1.19632	up	0.752288	-0.190345	normal	0.472114	0.412488	normal	Transferrin receptor-like dimerisation domain
GRMZM2G010363	0.00336383	-0.742792	normal	3.61584e-11	1.29404	up	0.0877101	0.529337	normal	1.89763e-05	0.966243	normal	0.534253	0.227919	normal	CRAL/TRIO domain
GRMZM2G010422	1.18562e-08	-1.12932	down	2.82528e-08	0.856506	normal	0.146286	-0.28739	normal	0.000832929	0.627651	normal	0.0330549	-0.496662	normal	Vacuolar import and degradation protein
GRMZM2G010439	0.879257	0.0905455	normal	0.0050225	1.31539	up	0.00714077	1.38681	up	3.36147e-08	-1.73141	down	2.56361e-05	-1.62697	down	Domain of unknown function (DUF4220)
GRMZM2G010460	0.93171	-0.0254087	normal	3.99022e-56	-2.00992	down	4.06645e-42	-2.04059	down	9.2748e-05	-0.662628	normal	0.000323765	-0.679872	normal	Ubiquitin-conjugating enzyme
GRMZM2G010466	0.000176187	-1.65718	down	0.00529644	1.10849	up	0.350622	-0.548447	normal	0.844227	0.0893051	normal	0.000701624	-1.59138	down	--
GRMZM2G010468	0.0683029	0.622044	normal	0.00257143	1.35615	up	2.21842e-07	1.99616	up	7.28702e-06	2.85988	up	4.48528e-09	3.66348	up	Cytochrome P450
GRMZM2G010474	0.107845	1.05817	normal	--	--	--	0.000793641	2.31457	up	0.107369	-1.03369	normal	0.947847	0.0438955	normal	Protein of unknown function, DUF617
GRMZM2G010490	0.000397036	1.0475	up	0.436731	-0.32694	normal	0.0442157	0.696691	normal	0.264862	-0.481205	normal	0.103046	0.564826	normal	Protein CHAPERONE-LIKE PROTEIN OF POR1-like
GRMZM2G010491	1.94404e-08	-1.48878	down	0.0397503	0.424978	normal	5.37251e-05	-1.07888	down	8.15853e-06	1.05922	up	0.224336	-0.429646	normal	Thioredoxin
GRMZM2G010494	1.95638e-06	-0.590819	normal	4.26246e-43	1.00448	up	0.000911957	0.401466	normal	1.07749e-47	-0.926401	normal	1.14133e-43	-1.50864	down	Transketolase, thiamine diphosphate binding domain
GRMZM2G010539	0.0161239	1.19992	normal	0.00194943	-1.35782	down	0.650795	-0.162621	normal	0.000314234	-1.74542	down	0.233021	-0.564127	normal	--
GRMZM2G010545	0.00634965	-1.78438	down	9.69452e-05	1.7412	up	--	--	--	0.640016	0.28417	normal	0.0459116	-1.54302	normal	Protein of unknown function (DUF2985)
GRMZM2G010551	0.00538978	-0.651126	normal	6.76473e-06	0.868074	normal	0.421079	0.20593	normal	2.74597e-08	1.17424	up	0.0414054	0.531411	normal	Kelch motif
GRMZM2G010636	8.88869e-25	6.53327	up	3.30651e-59	-8.66688	down	2.80065e-25	-2.25859	down	5.58869e-34	-7.38611	down	0.00971865	-0.785521	normal	Replication protein A OB domain
GRMZM2G010669	4.14015e-16	-1.17157	down	0.0302362	0.28149	normal	9.89456e-10	-0.899742	normal	0.00311578	0.416325	normal	6.68932e-06	-0.74749	normal	SRF-type transcription factor (DNA-binding and dimerisation domain)
GRMZM2G010740	0.129799	0.890609	normal	1.59754e-06	-1.97198	down	0.00667394	-1.07026	down	--	--	--	0.275001	0.924203	normal	von Willebrand factor type A domain
GRMZM2G010745	0.796213	-0.0649218	normal	8.78246e-21	-1.10038	down	2.24442e-13	-1.17041	down	3.40545e-07	1.0013	up	3.58944e-05	0.946399	normal	Protein of unknown function (DUF1084)
GRMZM2G010762	2.87271e-05	-1.05232	down	0.00024745	0.924224	normal	0.679493	-0.134922	normal	7.11751e-93	-2.89497	down	7.8558e-153	-3.96288	down	Plastocyanin-like domain
GRMZM2G010765	1.07873e-07	-1.41483	down	0.921469	0.0217146	normal	5.5622e-08	-1.40498	down	2.42626e-10	-1.04853	down	8.3751e-26	-2.46689	down	MatE
GRMZM2G010768	2.64818e-14	1.38789	up	1.36454e-49	-2.03879	down	1.0572e-07	-0.654398	normal	0.640036	-0.464121	normal	0.964288	0.0588273	normal	Myo-inositol-1-phosphate synthase
GRMZM2G010783	0.00139842	0.603783	normal	1.42762e-108	-1.40458	down	9.63328e-07	-0.79713	normal	2.22605e-62	-1.11054	down	0.00438194	-0.488917	normal	Hypoxia induced protein conserved region
GRMZM2G010801	0.45788	-0.192265	normal	1.66486e-09	-0.805106	normal	2.5444e-08	-1.00384	down	0.0166142	-0.403638	normal	0.00454777	-0.589032	normal	Conserved hypothetical protein 95
GRMZM2G010823	3.58038e-10	-1.01306	down	0.0520088	0.252582	normal	3.4071e-07	-0.771923	normal	0.512257	0.10237	normal	5.9848e-09	-0.906578	normal	Lyase
GRMZM2G010868	0.000204765	-1.20068	down	1.64004e-07	1.7743	up	0.0339404	0.592353	normal	0.000226155	-1.28797	down	7.647e-32	-2.55725	down	Protease inhibitor/seed storage/LTP family
GRMZM2G010892	5.20282e-17	2.12059	up	0.0181013	-0.881101	normal	3.25239e-05	1.19651	up	4.38129e-08	-1.71076	down	0.129828	0.401418	normal	Protein tyrosine and serine/threonine kinase
GRMZM2G010909	0.00191024	-1.46086	down	0.012001	0.924123	normal	0.159258	-0.592042	normal	3.85591e-06	1.97243	up	0.40161	0.498385	normal	Wound-induced protein WI12
GRMZM2G010920	0.000642744	-0.557567	normal	3.01898e-37	1.76372	up	5.26555e-12	1.19395	up	8.35399e-15	4.2712	up	1.15636e-27	4.19851	up	MYB-CC type transfactor, LHEQLE motif
GRMZM2G010933	0.0209164	-0.922788	normal	0.00857187	0.915267	normal	0.968642	-0.0210075	normal	0.00214036	-0.894826	normal	1.97825e-07	-1.82725	down	Cytochrome C oxidase copper chaperone (COX17)
GRMZM2G010944	0.00833209	-0.780022	normal	9.53919e-09	1.2529	up	0.178049	0.450014	normal	1.90841e-11	1.37358	up	0.0618417	0.586177	normal	Activator of Hsp90 ATPase, N-terminal
GRMZM2G010962	4.31072e-06	1.96946	up	0.528324	0.352467	normal	1.24469e-06	2.28353	up	0.254118	0.648221	normal	1.31397e-09	2.69408	up	D-mannose binding lectin
GRMZM2G010973	0.0101549	-0.899114	normal	0.508703	-0.215255	normal	0.000271629	-1.1297	down	0.0180465	1.01041	normal	0.813021	0.138481	normal	Tetratricopeptide repeat
GRMZM2G010987	0.0517333	0.446468	normal	0.217458	-0.255675	normal	0.401352	0.182637	normal	0.0102892	0.576851	normal	1.70103e-07	1.0381	up	UDP-glucoronosyl and UDP-glucosyl transferase
GRMZM2G011006	--	--	--	0.00765254	-1.26835	down	0.00156386	-2.19303	down	1.47485e-19	-3.01813	down	3.90988e-12	-4.06082	down	--
GRMZM2G011055	0.312436	0.475672	normal	8.51386e-07	3.00877	up	4.12789e-10	3.60146	up	0.961159	0.0299676	normal	0.226747	0.526207	normal	FBD
GRMZM2G011070	0.00175077	-0.671373	normal	4.33468e-05	-0.326922	normal	2.93696e-07	-1.00458	down	0.621273	0.0464929	normal	0.00194876	-0.620775	normal	Protein tyrosine and serine/threonine kinase
GRMZM2G011078	2.17641e-17	-1.5907	down	1.47259e-27	1.64105	up	0.902044	0.0342819	normal	1.10233e-05	0.786665	normal	0.00144637	-0.796127	normal	SCAMP family
GRMZM2G011098	0.00581939	1.38297	up	--	--	--	8.17582e-07	1.91419	up	0.049786	-1.03693	normal	0.354989	0.37246	normal	Glycolipid transfer protein (GLTP)
GRMZM2G011110	--	--	--	--	--	--	--	--	--	2.94385e-10	-2.59155	down	6.09183e-07	-2.17828	down	AP2 domain
GRMZM2G011136	0.0149856	-0.421666	normal	0.0100486	0.318656	normal	0.540377	-0.113341	normal	2.08115e-08	-0.677794	normal	8.26148e-12	-1.09167	down	Protein of unknown function (DUF3754)
GRMZM2G011141	0.957232	-0.0299119	normal	0.618003	0.196072	normal	0.749317	0.154177	normal	0.00447606	1.30679	up	0.0117312	1.29838	normal	Lipase (class 3)
GRMZM2G011160	3.27226e-05	-2.72461	down	1.24988e-08	2.40596	up	--	--	--	5.80693e-05	1.93698	up	--	--	--	ABC transporter
GRMZM2G011213	0.0347502	0.491145	normal	1.3384e-09	-0.984593	normal	0.00708428	-0.498266	normal	2.48416e-07	1.27384	up	9.88796e-13	1.78211	up	Mitochondrial glycoprotein
GRMZM2G011240	1.06649e-24	-3.5058	down	0.0464601	0.26155	normal	6.9289e-23	-3.27848	down	6.15664e-06	-0.553183	normal	7.57356e-39	-4.11423	down	Sucrose synthase
GRMZM2G011253	0.00414872	0.644658	normal	3.53275e-08	0.871875	normal	2.46321e-12	1.50114	up	0.011836	-0.389742	normal	0.258808	0.267748	normal	Ribosomal protein L31e
GRMZM2G011269	0.0490127	0.30414	normal	9.08081e-27	1.11072	up	1.02683e-31	1.40569	up	4.2503e-123	2.84429	up	1.90901e-114	3.15871	up	Mpv17 / PMP22 family
GRMZM2G011314	0.000269572	1.54339	up	--	--	--	0.245046	0.517847	normal	0.0497878	-1.07015	normal	0.323874	0.449779	normal	Protein of unknown function (DUF1365)
GRMZM2G011355	0.0103355	0.819598	normal	0.0497019	-0.406346	normal	0.175637	0.415504	normal	0.412892	0.183239	normal	0.000186191	1.02446	up	ADP-ribosylation factor family
GRMZM2G011367	4.11638e-07	-2.01686	down	8.4538e-11	2.59548	up	--	--	--	0.000100186	1.53841	up	0.481493	-0.466604	normal	--
GRMZM2G011404	0.903674	-0.0345774	normal	2.06213e-14	-1.11678	down	4.309e-12	-1.15899	down	0.419241	0.166801	normal	0.517581	0.140422	normal	Protein of unknown function (DUF616)
GRMZM2G011479	0.0122371	0.922088	normal	2.07321e-12	-1.98865	down	4.98409e-05	-1.07466	down	0.0057617	-1.08739	down	0.679383	-0.170478	normal	SNARE associated Golgi protein
GRMZM2G011513	3.69957e-24	1.55403	up	6.08003e-28	2.09427	up	4.63145e-109	3.64789	up	2.08937e-08	0.960443	normal	4.44547e-79	2.53544	up	C2 domain
GRMZM2G011518	0.0624353	0.375551	normal	4.11389e-18	-1.17893	down	1.0257e-07	-0.809664	normal	0.00042837	-0.581473	normal	0.30776	-0.196344	normal	ADP-ribosylation factor family
GRMZM2G011523	6.33074e-53	2.51243	up	0	-5.41152	down	2.17194e-101	-2.87317	down	0	-6.11418	down	2.00111e-154	-3.55906	down	--
GRMZM2G011592	5.03738e-18	-1.45319	down	8.71459e-53	2.00341	up	0.000572534	0.534826	normal	0.911295	-0.018929	normal	1.03657e-26	-1.47362	down	Sodium/calcium exchanger protein
GRMZM2G011598	8.23921e-11	-1.90083	down	0.146373	0.408669	normal	5.54871e-06	-1.49445	down	0.0352615	-0.500884	normal	1.54929e-20	-2.42378	down	No apical meristem (NAM) protein
GRMZM2G011608	0.0246908	0.50067	normal	8.02863e-05	0.758816	normal	8.87119e-08	1.2459	up	0.0293685	-0.352266	normal	0.490755	0.160761	normal	--
GRMZM2G011624	0.0126443	0.919582	normal	0.781496	0.127993	normal	0.00297552	1.04395	up	0.0598266	-0.718274	normal	0.562006	0.212533	normal	Acetyltransferase (GNAT) family
GRMZM2G011655	0.021953	0.621933	normal	9.50721e-16	-1.71079	down	7.9535e-08	-1.09899	down	7.30015e-05	-1.05537	down	0.0895649	-0.431352	normal	Squalene/phytoene synthase
GRMZM2G011662	2.1852e-16	-1.18588	down	7.72059e-24	-0.72246	normal	2.29474e-50	-1.91628	down	0.019892	0.243724	normal	1.2305e-09	-0.936329	normal	Aldose 1-epimerase
GRMZM2G011742	0.00146536	-0.462388	normal	9.17577e-16	-0.671668	normal	1.77835e-29	-1.14396	down	1.20263e-08	0.529801	normal	0.595251	0.0742561	normal	Frigida-like protein
GRMZM2G011743	0.0727032	0.449484	normal	0.497755	0.186492	normal	0.00597964	0.629292	normal	0.00118664	1.02908	up	4.30118e-07	1.4985	up	Asparaginase
GRMZM2G011746	0.957828	0.015512	normal	4.70602e-14	-1.19856	down	7.6726e-13	-1.19237	down	4.49803e-09	-1.18056	down	1.60589e-07	-1.15891	down	NnrU protein
GRMZM2G011888	4.68996e-07	1.88623	up	0.278247	-0.435051	normal	1.53589e-05	1.45994	up	0.724498	0.19938	normal	1.23266e-08	2.13519	up	CBS domain
GRMZM2G011915	3.46041e-06	-1.22395	down	2.71302e-11	1.59681	up	0.29536	0.35725	normal	1.03359e-06	1.14634	up	0.838577	-0.0753867	normal	Squalene/phytoene synthase
GRMZM2G011919	3.98494e-31	6.31749	up	--	--	--	3.15903e-29	5.95788	up	--	--	--	2.56115e-25	4.9532	up	Protein kinase domain
GRMZM2G012046	1.21649e-06	0.605039	normal	5.35683e-17	-0.716198	normal	0.275471	-0.118673	normal	2.42211e-06	0.488256	normal	5.76118e-23	1.10378	up	MAC/Perforin domain
GRMZM2G012071	8.94775e-09	-1.09254	down	1.70113e-35	2.05651	up	3.68576e-06	0.949473	normal	3.32844e-36	2.56029	up	2.14083e-08	1.47602	up	--
GRMZM2G012119	0.0107381	-0.751421	normal	4.80227e-08	1.80804	up	0.00941653	1.05276	up	0.760862	0.111414	normal	0.0704972	-0.633093	normal	--
GRMZM2G012143	0.00712709	-1.36297	down	0.0203736	1.03967	normal	--	--	--	0.901897	-0.0708809	normal	0.0089736	-1.44943	down	CBS domain
GRMZM2G012160	1.16143e-07	0.86815	normal	0.00309896	-0.371527	normal	0.000606354	0.490309	normal	1.87512e-90	-2.04921	down	2.42511e-18	-1.16646	down	Aspartic acid proteinase inhibitor
GRMZM2G012183	--	--	--	--	--	--	--	--	--	0.000211856	-2.1738	down	3.77665e-08	-3.25572	down	--
GRMZM2G012200	0.718475	0.0833243	normal	6.06275e-36	-1.4184	down	4.80444e-27	-1.34341	down	0.0298529	-0.353015	normal	0.148076	-0.262438	normal	--
GRMZM2G012224	0.385674	0.271863	normal	0.118479	0.402016	normal	0.0067773	0.666573	normal	4.73666e-08	1.4868	up	2.90713e-12	1.78413	up	Protein of unknown function (DUF642)
GRMZM2G012229	0.000952185	-0.645248	normal	3.95401e-14	1.32939	up	0.00667364	0.668691	normal	6.71227e-11	0.986925	normal	0.123551	0.345917	normal	Cleavage site for pathogenic type III effector avirulence factor Avr
GRMZM2G012233	0.000288209	1.19655	up	2.35024e-05	-1.10038	down	0.620003	0.102916	normal	0.0799288	0.614987	normal	2.53833e-16	1.86582	up	--
GRMZM2G012306	0.0115411	-0.805466	normal	0.121854	-0.422606	normal	4.65676e-07	-1.24951	down	5.02552e-07	-1.16199	down	6.62991e-22	-1.98925	down	POT family
GRMZM2G012326	0.128191	-0.288344	normal	3.06452e-26	-0.879502	normal	6.4983e-15	-1.17206	down	0.00301061	-0.311182	normal	0.000385789	-0.59117	normal	Protein kinase domain
GRMZM2G012391	0.000246432	0.634194	normal	1.66136e-23	-1.1563	down	0.000357524	-0.526964	normal	3.98681e-31	-1.2843	down	4.32437e-06	-0.638504	normal	Cytochrome P450
GRMZM2G012413	0.000223923	-0.897473	normal	0.748164	0.0663322	normal	0.000866396	-0.838331	normal	1.13959e-07	1.13822	up	0.476969	0.242367	normal	Regulator of Vps4 activity in the MVB pathway
GRMZM2G012455	1.02068e-23	4.74323	up	1.01813e-22	-4.32798	down	0.177849	0.476394	normal	--	--	--	2.26369e-05	2.32182	up	Hsp20/alpha crystallin family
GRMZM2G012464	0.00154606	2.52051	up	--	--	--	1.28273e-09	4.50665	up	--	--	--	2.884e-09	5.08484	up	--
GRMZM2G012479	1.2481e-07	1.55682	up	0.000416388	1.413	up	1.04154e-20	2.98751	up	0.67258	0.196794	normal	1.12469e-08	1.77814	up	Glutathione peroxidase
GRMZM2G012566	4.12227e-13	1.98077	up	1.67694e-10	-1.45608	down	0.00776773	0.535045	normal	0.440191	0.310264	normal	3.05699e-18	2.32476	up	--
GRMZM2G012584	1.0339e-08	1.02445	up	1.91486e-13	-1.07418	down	0.737146	-0.0555593	normal	0.134884	-0.309099	normal	2.69239e-05	0.726809	normal	IQ calmodulin-binding motif
GRMZM2G012628	5.60808e-08	0.693761	normal	3.60948e-33	-1.01068	down	0.00329788	-0.323179	normal	0.030509	-0.214748	normal	1.54634e-05	0.489554	normal	RNA recognition motif. (a.k.a. RRM, RBD, or RNP domain)
GRMZM2G012685	0.039898	0.971231	normal	2.56663e-10	4.45158	up	2.33287e-15	5.49956	up	0.035936	-0.934244	normal	0.924354	0.0551787	normal	Protein kinase domain
GRMZM2G012724	0.0113512	-1.10038	normal	0.0836074	0.585001	normal	0.211358	-0.542513	normal	0.0647171	-0.586279	normal	1.61599e-06	-1.71665	down	WRKY DNA -binding domain
GRMZM2G012756	--	--	--	--	--	--	--	--	--	0.0554777	-1.70532	normal	7.39757e-22	-7.11653	down	--
GRMZM2G012758	2.51799e-08	1.72762	up	0.0017005	1.76797	up	1.5937e-16	3.55866	up	0.0445581	1.32267	normal	3.62932e-09	3.11076	up	Glycosyl hydrolases family 17
GRMZM2G012806	0.327869	0.168335	normal	1.37087e-45	-1.02007	down	4.3567e-12	-0.856871	normal	2.25509e-11	-0.469653	normal	0.0294065	-0.291371	normal	Potato inhibitor I family
GRMZM2G012814	0.139728	-0.38183	normal	2.86548e-27	3.88599	up	2.04744e-17	3.47896	up	4.74239e-11	2.2688	up	1.81266e-06	1.91313	up	RHO protein GDP dissociation inhibitor
GRMZM2G012874	0.000208727	0.739958	normal	0.0401595	-0.411597	normal	0.124768	0.31927	normal	0.226237	0.334772	normal	4.88617e-06	1.08492	up	Glycosyltransferase family 43
GRMZM2G012891	0.000792026	-0.636288	normal	3.73913e-07	0.620901	normal	0.902683	-0.0291061	normal	9.24389e-06	-0.605884	normal	4.73864e-10	-1.2328	down	--
GRMZM2G012901	4.26374e-07	0.981896	normal	7.23767e-18	-1.15705	down	0.334986	-0.177327	normal	0.0349972	-0.384342	normal	0.00114555	0.610371	normal	--
GRMZM2G012923	0.650842	-0.13701	normal	8.49153e-27	1.063	up	0.000188818	0.898861	normal	2.03127e-05	0.473928	normal	0.199347	0.339346	normal	Sugar (and other) transporter
GRMZM2G012928	9.94646e-09	0.984234	normal	0.118394	0.257153	normal	2.691e-09	1.22705	up	0	-3.7123	down	1.46463e-78	-2.70025	down	Potato inhibitor I family
GRMZM2G012966	0.528814	0.325283	normal	0.249096	-0.467349	normal	0.71187	-0.150327	normal	4.14205e-19	-2.48272	down	3.83885e-16	-2.16212	down	Protein kinase domain
GRMZM2G012970	0.000862917	1.40652	up	3.41883e-08	-1.90765	down	0.0852428	-0.501195	normal	0.258918	-0.606385	normal	0.027342	0.821797	normal	Weak chloroplast movement under blue light
GRMZM2G012977	0.0981401	-0.677718	normal	6.6377e-17	5.4581	up	6.26267e-12	4.92452	up	1.19671e-13	4.66974	up	5.91842e-08	4.14017	up	--
GRMZM2G012992	0.85472	0.0908009	normal	0.605485	-0.189545	normal	0.809634	-0.104921	normal	8.65312e-05	-1.16211	down	0.00194832	-1.06365	down	Triose-phosphate Transporter family
GRMZM2G013002	0.00492002	-0.498709	normal	4.90861e-09	-0.665076	normal	7.39447e-26	-1.17659	down	2.64997e-07	0.663355	normal	0.2532	0.16991	normal	Expansin C-terminal domain
GRMZM2G013010	3.07364e-18	-3.97003	down	3.52105e-06	3.49201	up	--	--	--	1.31401e-05	1.60856	up	0.000228901	-2.36348	down	GDSL-like Lipase/Acylhydrolase
GRMZM2G013016	3.40584e-15	4.11032	up	--	--	--	4.82885e-19	4.27339	up	--	--	--	6.92521e-07	1.78007	up	GRAS domain family
GRMZM2G013042	0.0176165	-0.870217	normal	0.258445	0.267471	normal	0.0709904	-0.623372	normal	6.55311e-06	1.12552	up	0.577746	0.238221	normal	Enoyl-(Acyl carrier protein) reductase
GRMZM2G013100	0.00106944	-0.620497	normal	4.3067e-18	-0.715098	normal	7.47233e-16	-1.34019	down	0.553003	0.0669687	normal	0.00232503	-0.548288	normal	Histone acetyltransferases subunit 3
GRMZM2G013115	2.89694e-11	0.750471	normal	8.88387e-58	-1.07405	down	0.00159371	-0.329683	normal	2.5998e-37	1.73171	up	1.26214e-47	2.48666	up	ATPase family associated with various cellular activities (AAA)
GRMZM2G013128	0.00571007	-1.49416	down	0.0104165	1.1844	normal	--	--	--	0.118513	0.878202	normal	0.423579	-0.604028	normal	Clp amino terminal domain, pathogenicity island component
GRMZM2G013176	0.393312	-0.180918	normal	3.87375e-05	0.56856	normal	0.040408	0.377419	normal	1.09741e-13	1.16527	up	3.3213e-07	0.992445	normal	PB1 domain
GRMZM2G013196	--	--	--	4.65418e-110	-10.8321	down	1.7024e-08	-4.4408	down	--	--	--	--	--	--	--
GRMZM2G013201	0.10977	0.640593	normal	2.46333e-38	-2.90847	down	1.9416e-35	-2.2806	down	0.000316752	-1.1246	down	0.0781063	-0.477379	normal	SOUL heme-binding protein
GRMZM2G013248	--	--	--	1.96817e-45	-6.67681	down	3.1084e-37	-7.63284	down	4.0501e-76	-8.22439	down	1.74013e-48	-9.45229	down	--
GRMZM2G013255	0.857731	0.0937156	normal	0.622077	0.295946	normal	0.556623	0.37391	normal	0.00244018	1.84456	up	0.00131201	2.0252	up	Alpha-L-fucosidase
GRMZM2G013283	0.00110253	-0.933411	normal	3.72416e-10	0.808066	normal	0.649643	-0.153101	normal	1.00262e-07	-0.569945	normal	7.53809e-09	-1.49786	down	Oligonucleotide/oligosaccharide-binding (OB)-fold
GRMZM2G013318	0.889109	0.0284031	normal	1.21367e-14	0.689673	normal	1.24736e-07	0.707026	normal	3.42147e-169	-1.96011	down	1.12743e-55	-1.91866	down	NOG1 N-terminal helical domain
GRMZM2G013324	0.000110224	0.612494	normal	6.6545e-49	-1.24549	down	8.87063e-06	-0.6358	normal	1.04355e-08	-0.634726	normal	0.959904	-0.0108605	normal	Glycerophosphoryl diester phosphodiesterase family
GRMZM2G013342	--	--	--	--	--	--	--	--	--	1.5188e-15	-3.1241	down	1.92674e-16	-3.62907	down	PsaD
GRMZM2G013349	2.03167e-08	0.991712	normal	0.270368	-0.204609	normal	3.48753e-07	0.780512	normal	0.0190659	0.517432	normal	2.95536e-17	1.52392	up	Triose-phosphate Transporter family
GRMZM2G013391	0.279593	-0.525294	normal	0.000291591	1.68024	up	0.0249642	1.15569	normal	0.00538311	1.47098	up	0.104651	0.988755	normal	WRKY DNA -binding domain
GRMZM2G013448	0.0945873	0.403836	normal	0.00109107	0.672649	normal	1.2356e-06	1.06729	up	1.53739e-05	1.26126	up	1.07146e-07	1.67605	up	2OG-Fe(II) oxygenase superfamily
GRMZM2G013450	0.920627	0.0345019	normal	3.83778e-05	1.07426	up	4.48479e-07	1.11129	up	0.00077161	0.924014	normal	1.80631e-05	0.980538	normal	Mitochondrial carrier protein
GRMZM2G013461	2.1448e-09	-1.22802	down	2.04404e-28	1.35225	up	0.579859	0.101844	normal	0.24747	-0.274715	normal	2.70908e-23	-1.51098	down	Aspartic acid proteinase inhibitor
GRMZM2G013519	0.014615	1.06784	normal	0.298438	-0.465374	normal	0.117181	0.604736	normal	0.622579	0.306018	normal	0.00227318	1.41389	up	PPR repeat family
GRMZM2G013524	1.28155e-08	2.45023	up	6.16039e-12	-2.83174	down	0.224409	-0.412888	normal	--	--	--	0.0664597	0.899489	normal	--
GRMZM2G013530	3.10845e-10	-2.6573	down	1.3162e-06	1.72382	up	--	--	--	1.09201e-08	2.24262	up	--	--	--	Transferase family
GRMZM2G013555	0.492441	-0.166865	normal	0.0784843	0.360708	normal	0.455598	0.184372	normal	7.93542e-07	-0.942718	normal	5.03625e-07	-1.10179	down	--
GRMZM2G013563	6.44034e-05	2.06336	up	0.000212383	-1.77691	down	0.544831	0.303628	normal	1.59356e-10	-2.72286	down	0.197029	-0.588967	normal	WD domain, G-beta repeat
GRMZM2G013588	0.782225	-0.0963402	normal	2.01597e-36	-2.09511	down	7.02067e-31	-2.19753	down	4.55427e-48	-2.40501	down	1.11372e-40	-2.49714	down	FANCI helical domain 2
GRMZM2G013593	2.5268e-11	4.81397	up	--	--	--	1.41961e-10	4.69415	up	--	--	--	3.80702e-10	5.28072	up	--
GRMZM2G013607	7.44265e-15	-1.32395	down	0.00051648	0.419364	normal	4.3525e-08	-0.917103	normal	0.0405884	0.300111	normal	5.89377e-08	-1.01938	down	2Fe-2S iron-sulfur cluster binding domain
GRMZM2G013634	0.578488	-0.152967	normal	3.83499e-14	-1.27632	down	3.0472e-17	-1.44032	down	9.28118e-05	-0.760069	normal	1.63087e-06	-0.908668	normal	2OG-Fe(II) oxygenase superfamily
GRMZM2G013650	0.503029	0.456386	normal	0.00538149	-1.24232	down	0.131724	-0.764623	normal	--	--	--	0.770377	0.213297	normal	--
GRMZM2G013652	5.27646e-06	1.49186	up	6.8195e-13	-1.2647	down	0.454723	0.254461	normal	0.0266533	-0.512776	normal	0.00138026	1.01411	up	Chaperonin 10 Kd subunit
GRMZM2G013663	0.0429141	1.16657	normal	7.76543e-06	-2.12037	down	0.0221541	-0.978554	normal	--	--	--	0.0373038	1.42201	normal	--
GRMZM2G013761	--	--	--	5.38787e-39	-7.4602	down	2.54489e-36	-7.53807	down	1.42727e-94	-10.6264	down	1.03368e-73	-10.9808	down	--
GRMZM2G013767	0.439443	-0.519123	normal	0.00444519	1.57106	up	--	--	--	0.0979218	1.06784	normal	0.529862	0.549737	normal	Protein kinase domain
GRMZM2G013777	0.00824721	-1.28751	down	0.520673	0.327117	normal	--	--	--	0.544078	-0.324373	normal	0.000677206	-1.64548	down	GDSL/SGNH-like Acyl-Esterase family found in Pmr5 and Cas1p
GRMZM2G013783	0.699024	0.124404	normal	4.7175e-09	-1.27948	down	3.4767e-07	-1.16396	down	0.444685	0.278394	normal	0.209033	0.414437	normal	AMP-binding enzyme
GRMZM2G013798	0.00858728	-0.94043	normal	9.34867e-08	2.89182	up	0.00871974	1.86148	up	1.00011e-12	3.57426	up	5.77002e-06	2.7226	up	Ribosomal protein S2
GRMZM2G013811	0.00120174	0.51732	normal	1.63785e-48	-1.3011	down	1.15703e-10	-0.788296	normal	0.165368	0.193681	normal	1.32892e-06	0.721761	normal	4-alpha-glucanotransferase
GRMZM2G013920	2.76157e-14	-5.2876	down	0.0132235	1.17723	normal	--	--	--	1.22127e-29	-2.9748	down	1.11528e-37	-8.66865	down	--
GRMZM2G013957	0.520509	-0.137351	normal	0.507771	0.0615677	normal	0.653334	-0.0854659	normal	0	3.56224	up	1.6887e-102	3.41788	up	cAMP-regulated phosphoprotein/endosulfine conserved region
GRMZM2G013971	0.00201268	-1.06271	down	7.2284e-05	0.784036	normal	0.429054	-0.307699	normal	0.00120774	0.615418	normal	0.205869	-0.466408	normal	Zinc finger, C3HC4 type (RING finger)
GRMZM2G013986	0.00447355	-0.939794	normal	0.635943	0.230517	normal	3.87724e-05	-0.729781	normal	0.770688	-0.161034	normal	1.14064e-09	-1.13422	down	Subtilase family
GRMZM2G013987	0.0263269	-0.453914	normal	1.93167e-16	-1.09357	down	5.79675e-26	-1.55805	down	0.000962974	-0.597508	normal	1.46632e-07	-1.04517	down	--
GRMZM2G014009	0.00496667	1.0066	up	0.198616	0.519502	normal	3.32603e-05	1.51581	up	0.10689	-0.677325	normal	0.480936	0.329563	normal	zinc-finger of the FCS-type, C2-C2
GRMZM2G014043	1.11398e-12	4.05051	up	--	--	--	4.19091e-28	3.74881	up	--	--	--	6.24892e-20	3.69631	up	--
GRMZM2G014066	0.113662	0.245976	normal	1.17765e-29	-1.09212	down	1.02487e-12	-0.852887	normal	0.00316141	-0.352432	normal	0.535586	-0.0972603	normal	Stress-induced protein Di19, C-terminal
GRMZM2G014089	3.46262e-12	-3.01829	down	3.62927e-36	3.08438	up	0.882286	-0.105607	normal	1.59755e-28	3.08248	up	0.918458	-0.0839355	normal	ABC transporter transmembrane region
GRMZM2G014329	2.78077e-05	-1.11181	down	0.102125	0.66431	normal	0.447949	-0.404062	normal	0.229411	0.529424	normal	0.326623	-0.533601	normal	--
GRMZM2G014366	0.000240991	0.729156	normal	5.29318e-11	-1.01494	down	0.121543	-0.292839	normal	0.00110321	0.657661	normal	1.28389e-13	1.40033	up	Protein tyrosine and serine/threonine kinase
GRMZM2G014395	0.242694	-0.294904	normal	0.0751296	-0.294576	normal	0.0041301	-0.598316	normal	1.16787e-12	-1.09707	down	5.94348e-12	-1.38345	down	Cytochrome P450
GRMZM2G014400	0.0142392	0.518724	normal	5.57705e-15	-1.00243	down	0.00865494	-0.486708	normal	0.0103423	-0.418015	normal	0.629221	0.111655	normal	RNA recognition motif. (a.k.a. RRM, RBD, or RNP domain)
GRMZM2G014409	3.46867e-09	-3.44615	down	1.2277e-06	1.5517	up	--	--	--	8.23923e-08	1.9353	up	--	--	--	--
GRMZM2G014460	--	--	--	3.79369e-16	-5.38704	down	2.19609e-15	-5.48966	down	1.5321e-12	-5.08672	down	9.495e-12	-5.5904	down	--
GRMZM2G014499	0.0311533	1.75657	normal	--	--	--	0.630829	0.300949	normal	--	--	--	0.00123226	2.54868	up	Subtilase family
GRMZM2G014558	--	--	--	--	--	--	--	--	--	6.29245e-07	-1.86945	down	8.97441e-13	-3.05049	down	Cellulose synthase
GRMZM2G014672	5.49495e-05	0.652357	normal	2.51951e-11	1.39001	up	1.36696e-27	2.03765	up	0.581975	-0.136305	normal	0.0120753	0.523013	normal	Inhibitor of apoptosis-promoting Bax1
GRMZM2G014676	0.118324	0.398331	normal	0.000351187	0.730599	normal	1.33001e-07	1.12123	up	0.0420505	-0.408868	normal	0.998562	0.000504943	normal	Prefoldin subunit
GRMZM2G014705	5.51701e-23	-1.0453	down	0.201258	-0.0931281	normal	2.68296e-51	-1.14958	down	8.93438e-135	1.56449	up	1.04172e-09	0.524734	normal	Early nodulin 93 ENOD93 protein
GRMZM2G014729	7.12577e-11	-2.18797	down	0.40909	0.192269	normal	4.00384e-09	-2.01137	down	0.721797	-0.106248	normal	1.67496e-10	-2.30681	down	Trehalose-phosphatase
GRMZM2G014797	0.237866	0.758692	normal	--	--	--	0.411449	-0.422157	normal	4.90908e-11	-2.79243	down	6.54311e-09	-2.05727	down	ABA/WDS induced protein
GRMZM2G014813	0.108886	-0.334929	normal	5.61375e-13	1.26998	up	3.94613e-05	0.920353	normal	3.94946e-11	-0.909707	normal	4.12961e-12	-1.23655	down	NAD binding domain of 6-phosphogluconate dehydrogenase
GRMZM2G014836	0.0535838	-0.8604	normal	8.60128e-05	1.78309	up	0.0739705	0.933392	normal	0.0054887	1.25521	up	0.431109	0.416188	normal	DTW domain
GRMZM2G014914	0.000436718	0.717868	normal	0.0327875	-0.439845	normal	0.0502613	0.270407	normal	0.16127	0.354454	normal	2.19722e-13	1.09083	up	Major intrinsic protein
GRMZM2G014951	6.89046e-14	5.2345	up	--	--	--	0.000747237	1.95186	up	--	--	--	6.79903e-06	2.72908	up	Sulfotransferase domain
GRMZM2G014979	3.54061e-17	-1.86818	down	1.44747e-60	8.07422	up	1.11815e-27	6.29353	up	6.22319e-86	4.3404	up	2.15831e-12	2.44171	up	--
GRMZM2G014986	2.84004e-24	-5.61547	down	4.85665e-23	4.36146	up	--	--	--	9.60536e-21	4.72996	up	--	--	--	--
GRMZM2G014988	--	--	--	--	--	--	--	--	--	9.88684e-12	-4.38347	down	5.84719e-10	-4.06796	down	--
GRMZM2G014994	0.00179294	0.565689	normal	9.22597e-56	-1.99806	down	5.21825e-30	-1.44081	down	5.126e-49	-1.99854	down	2.54304e-25	-1.426	down	CRAL/TRIO domain
GRMZM2G015011	0.0886018	0.420608	normal	0.000730442	1.03136	up	1.9752e-06	1.44029	up	0.705906	0.122034	normal	0.0326442	0.553796	normal	Topoisomerase VI B subunit, transducer
GRMZM2G015136	--	--	--	0.00107579	-1.64731	down	5.85376e-06	-2.38684	down	--	--	--	--	--	--	Protein tyrosine and serine/threonine kinase
GRMZM2G015190	0.532186	-0.276447	normal	2.01193e-10	1.29664	up	0.00992138	0.970062	normal	2.59732e-06	1.0619	up	0.0543547	0.768655	normal	SNF2 family N-terminal domain
GRMZM2G015212	3.12205e-08	3.86269	up	2.63655e-13	-4.55499	down	0.134931	-0.657831	normal	--	--	--	0.0193211	1.56567	normal	--
GRMZM2G015219	0.935515	0.0264486	normal	1.5936e-35	-1.48056	down	8.3239e-14	-1.44965	down	0.00183968	-0.518421	normal	0.0448279	-0.481121	normal	Tetratricopeptide repeat
GRMZM2G015277	0.00433028	-1.00582	down	0.0915439	0.331709	normal	0.0653208	-0.690984	normal	0.00038132	0.72305	normal	0.481656	-0.300486	normal	DNA-binding domain
GRMZM2G015287	0.0589376	0.42372	normal	9.68138e-26	-1.53779	down	3.28057e-13	-1.12111	down	6.82962e-07	-0.965282	normal	0.0110523	-0.534556	normal	Ubiquitin-conjugating enzyme
GRMZM2G015324	0.357771	-0.168177	normal	8.86511e-14	-0.860583	normal	3.13499e-15	-1.03746	down	0.57934	0.0997296	normal	0.759206	-0.0605814	normal	EF hand
GRMZM2G015364	0.000196448	-1.01338	down	0.000420596	2.80035	up	0.00191014	2.63207	up	1.24489e-51	3.32035	up	6.68378e-11	2.27029	up	RWD domain
GRMZM2G015368	3.45488e-14	-2.14428	down	5.68402e-40	3.68574	up	0.00197646	1.46076	up	6.50443e-15	1.89294	up	0.58916	-0.259552	normal	Essential protein Yae1, N terminal
GRMZM2G015395	9.79683e-21	1.62538	up	4.70895e-86	-2.09797	down	0.00314126	-0.468176	normal	2.46949e-19	-1.30784	down	0.0823098	0.332242	normal	Domain of unknown function (DUF3490)
GRMZM2G015406	0.123947	0.589533	normal	0.970894	0.0168888	normal	0.0751402	0.602393	normal	0.00151057	2.10016	up	5.20341e-05	2.76164	up	Leucine rich repeat
GRMZM2G015419	4.27189e-09	1.87147	up	0.252134	0.542873	normal	3.64968e-13	2.41853	up	0.000112301	1.94495	up	7.66241e-31	3.98183	up	Lipoxygenase
GRMZM2G015432	9.71328e-18	2.83989	up	1.89735e-14	-3.29671	down	9.99899e-05	-0.638087	normal	2.67412e-06	-2.09487	down	3.76545e-05	0.703312	normal	Ribosomal protein L5
GRMZM2G015436	0.00299155	0.490192	normal	1.36816e-13	1.03203	up	4.59069e-26	1.51411	up	1.52942e-33	2.37357	up	2.01829e-41	2.87574	up	Tryptophan synthase alpha chain
GRMZM2G015534	6.81864e-23	1.20843	up	0	-2.64974	down	1.56294e-53	-1.44326	down	1.07793e-129	-1.79628	down	1.53241e-07	-0.57375	normal	Basic leucine-zipper C terminal
GRMZM2G015592	2.05567e-09	-1.06584	down	1.87072e-17	-0.927414	normal	1.13712e-36	-2.00086	down	0.007062	-0.350499	normal	6.0172e-17	-1.41229	down	RED-like protein N-terminal region
GRMZM2G015599	--	--	--	--	--	--	--	--	--	0.333205	-0.606816	normal	4.84301e-11	-5.45198	down	--
GRMZM2G015637	0.220559	0.517761	normal	0.912431	0.0522042	normal	0.124385	0.568132	normal	0.153846	0.732131	normal	0.00210169	1.29422	up	--
GRMZM2G015642	7.25226e-05	0.576412	normal	6.19339e-34	-1.23342	down	1.93055e-07	-0.662788	normal	0.818885	0.0395829	normal	2.56361e-05	0.62556	normal	Signal recognition particle receptor beta subunit
GRMZM2G015648	1.72259e-07	-2.1927	down	0.0388056	0.932677	normal	--	--	--	0.0178158	-0.878856	normal	5.37106e-12	-3.08706	down	Pumilio-family RNA binding repeat
GRMZM2G015730	0.0414789	-0.360798	normal	1.03078e-19	-0.959737	normal	9.03161e-24	-1.32855	down	7.82685e-10	-0.748267	normal	5.01623e-14	-1.10199	down	Myosin-like coiled-coil protein
GRMZM2G015739	--	--	--	1.02182e-09	-2.97688	down	0.0134698	-1.34334	normal	0.000181632	-2.29592	down	0.268113	-0.769107	normal	--
GRMZM2G015767	0.213194	-0.306489	normal	1.2548e-17	1.91277	up	1.42954e-09	1.59013	up	0.000618808	-0.607857	normal	1.306e-05	-0.908429	normal	POT family
GRMZM2G015788	0.0212772	-0.475645	normal	1.71887e-11	-0.720484	normal	1.44724e-12	-1.20177	down	0.413147	0.13395	normal	0.118091	-0.335336	normal	--
GRMZM2G015804	1.16329e-25	1.45162	up	0.138378	-0.208109	normal	1.3281e-22	1.23682	up	0.0656032	-0.280228	normal	1.24569e-17	1.18349	up	Glycosyl hydrolase family 1
GRMZM2G015805	--	--	--	1.20755e-74	-6.11513	down	0.000405705	-2.95457	down	--	--	--	--	--	--	--
GRMZM2G015844	0.00163525	-1.49581	down	0.453711	-0.231317	normal	0.000213872	-1.72484	down	0.369513	0.379143	normal	0.0535686	-1.12701	normal	--
GRMZM2G015886	0.00163451	1.14526	up	0.0303215	-0.710404	normal	0.209763	0.435682	normal	0.0226278	1.17968	normal	6.65103e-08	2.37764	up	Cellulose synthase
GRMZM2G015908	--	--	--	--	--	--	--	--	--	0.00753798	-1.5568	down	0.000281201	-2.1945	down	Putative Phosphatase
GRMZM2G015923	0.0503934	-1.08354	normal	1.73415e-06	2.3577	up	--	--	--	2.98394e-07	3.21607	up	--	--	--	Glycosyl transferase family 8
GRMZM2G015933	5.48315e-36	-7.44634	down	2.41063e-40	5.20732	up	--	--	--	1.46896e-13	2.13826	up	1.68441e-12	-5.74491	down	Leucine rich repeat
GRMZM2G015941	0.000837837	2.35702	up	--	--	--	0.011712	1.79466	normal	--	--	--	0.00110398	2.83294	up	PLAC8 family
GRMZM2G015955	7.59198e-21	1.19165	up	2.94474e-06	-0.541033	normal	3.0556e-09	0.64315	normal	5.85158e-22	-1.0867	down	0.384427	0.114892	normal	ZIP Zinc transporter
GRMZM2G015967	0.0561498	-0.838073	normal	0.0534178	0.77342	normal	0.877904	-0.0750382	normal	0.233725	-0.469293	normal	0.00014671	-1.33576	down	Cyclophilin type peptidyl-prolyl cis-trans isomerase/CLD
GRMZM2G015972	0.506322	0.146625	normal	1.13485e-16	1.64989	up	5.29103e-22	1.79353	up	0.000988669	0.717595	normal	3.62213e-05	0.876131	normal	ARP2/3 complex ARPC3 (21 kDa) subunit
GRMZM2G015976	0.00299691	0.716506	normal	0.219931	0.398702	normal	4.88675e-05	1.10524	up	7.33046e-08	2.4286	up	8.07275e-14	3.20565	up	Sugar efflux transporter for intercellular exchange
GRMZM2G015983	0.246751	-0.306405	normal	0.514701	0.118588	normal	0.447162	-0.199105	normal	2.4783e-13	-0.997083	normal	4.18275e-10	-1.29356	down	Xyloglucan fucosyltransferase
GRMZM2G016039	3.68411e-10	-2.40749	down	1.68719e-06	1.7254	up	0.152928	-0.685005	normal	0.185583	0.546784	normal	1.93218e-05	-1.87367	down	Helix-loop-helix DNA-binding domain
GRMZM2G016068	2.72773e-07	1.14154	up	0.872217	-0.0407103	normal	4.09356e-08	1.09554	up	0.0992827	-0.448801	normal	0.00816739	0.699907	normal	--
GRMZM2G016088	0.000272728	1.6849	up	--	--	--	0.103071	0.811252	normal	--	--	--	0.000655074	2.02234	up	Protein of unknown function (DUF1997)
GRMZM2G016097	0.000590461	1.0188	up	2.09754e-12	4.08262	up	0.00033533	2.98411	up	0.00533627	1.39292	up	2.85917e-08	2.45364	up	LSM domain
GRMZM2G016153	0.222818	0.496167	normal	0.103659	0.57727	normal	0.00022672	1.08237	up	0.140617	-0.514172	normal	0.986604	-0.00607577	normal	--
GRMZM2G016212	--	--	--	1.20869e-14	-4.70012	down	5.86393e-16	-5.55233	down	--	--	--	--	--	--	Peptidase M50B-like
GRMZM2G016236	0.0943009	0.891664	normal	1.19176e-06	-1.89048	down	0.0284399	-0.976601	normal	0.0300656	-1.16783	normal	0.656031	-0.285409	normal	Aldo/keto reductase family
GRMZM2G016250	0.759501	0.123652	normal	1.136e-07	1.38066	up	2.40055e-19	1.52254	up	0.771242	0.147343	normal	0.0873424	0.289308	normal	Ribosomal L27e protein family
GRMZM2G016275	0.280194	-0.617863	normal	0.534939	-0.315486	normal	0.0553918	-0.950092	normal	0.115685	-0.748874	normal	0.00250549	-1.40308	down	Protein of unknown function, DUF393
GRMZM2G016370	0.00748089	1.96323	up	--	--	--	3.80681e-09	2.92682	up	--	--	--	8.00111e-15	6.15588	up	Myb-like DNA-binding domain
GRMZM2G016382	0.255806	-0.425749	normal	5.43675e-06	-0.726421	normal	0.000207582	-1.14395	down	0.189222	-0.318319	normal	0.041888	-0.737199	normal	PPR repeat
GRMZM2G016393	0.00102043	-0.975485	normal	7.10736e-10	2.18531	up	0.00558833	1.21029	up	0.0163688	0.948509	normal	0.995488	0.00324326	normal	Ribosomal family S4e
GRMZM2G016447	1.12031e-92	3.58101	up	0.00109344	0.78312	normal	1.01e-240	4.38829	up	1.85935e-14	2.37552	up	6.1775e-226	6.0363	up	--
GRMZM2G016477	0.0118948	1.0993	normal	0.486476	0.467822	normal	0.0117504	1.49283	normal	--	--	--	0.000367456	1.95372	up	Leucine rich repeat
GRMZM2G016480	0.203122	0.22955	normal	2.04504e-10	1.19675	up	2.00259e-12	1.41491	up	2.5714e-05	-0.619585	normal	0.0210258	-0.381696	normal	Protein kinase domain
GRMZM2G016521	0.0389865	0.961433	normal	0.0019204	1.54938	up	1.64551e-07	2.50623	up	0.421442	-0.390426	normal	0.2177	0.596021	normal	Cotton fibre expressed protein
GRMZM2G016546	0.0193655	1.04997	normal	3.24574e-05	-1.33283	down	0.487629	-0.261987	normal	0.747171	-0.171057	normal	0.0294573	0.915625	normal	Probable N6-adenine methyltransferase
GRMZM2G016551	0.000375226	0.969524	normal	0.450216	-0.21532	normal	3.98807e-05	0.757335	normal	0.52455	0.253787	normal	5.94913e-05	1.23893	up	TLC domain
GRMZM2G016605	0.18095	0.61812	normal	0.00262747	-1.07913	down	0.067291	-0.476739	normal	0.522253	-0.329402	normal	0.455447	0.302596	normal	--
GRMZM2G016660	9.4449e-08	-0.742387	normal	2.35698e-42	1.80423	up	6.36553e-11	1.05055	up	7.93724e-42	1.82314	up	1.104e-11	1.08933	up	Protein kinase domain
GRMZM2G016668	0.0279495	1.40683	normal	--	--	--	0.016768	1.07207	normal	--	--	--	0.00469895	1.59012	up	Ankyrin repeats (3 copies)
GRMZM2G016677	0.000523953	-1.94226	down	0.000719833	2.19666	up	--	--	--	0.309455	0.647532	normal	--	--	--	PsbP
GRMZM2G016734	0.187625	0.902063	normal	0.346317	0.60469	normal	6.77119e-14	1.74686	up	0.123488	1.02771	normal	3.69048e-17	2.2543	up	DnaJ domain
GRMZM2G016774	0.000302466	-0.595802	normal	3.01363e-09	0.821865	normal	0.223896	0.215742	normal	2.5927e-11	1.06644	up	0.0140943	0.47973	normal	AMP-binding enzyme
GRMZM2G016827	1.21352e-07	-0.683856	normal	2.23596e-16	0.710075	normal	0.906541	0.0150375	normal	3.57337e-69	1.68353	up	1.01183e-17	1.00649	up	Memo-like protein
GRMZM2G016866	0.138695	-0.329207	normal	5.96615e-08	1.18251	up	0.000351623	0.845824	normal	0.000111526	0.857381	normal	0.021415	0.539494	normal	PPR repeat family
GRMZM2G016890	0.0157315	-0.46115	normal	2.07886e-40	2.39366	up	7.01138e-18	1.91541	up	1.55059e-17	1.79242	up	3.22151e-07	1.33884	up	Glycosyl hydrolase family 1
GRMZM2G016892	3.95104e-12	1.33154	up	1.16123e-35	-1.45107	down	0.573453	-0.115924	normal	0.000492196	-0.518778	normal	8.90314e-06	0.829859	normal	Tetratricopeptide repeat
GRMZM2G016928	0.00674388	0.577586	normal	0.000717735	0.537076	normal	4.11839e-08	1.10372	up	1.66642e-10	-0.834458	normal	0.248905	-0.242839	normal	Ribosomal L37ae protein family
GRMZM2G016948	0.475743	-0.443964	normal	--	--	--	--	--	--	0.0379182	-0.951145	normal	0.00165959	-1.43508	down	zinc-finger of the FCS-type, C2-C2
GRMZM2G016958	0.00270667	-0.530423	normal	0.0282685	-0.160377	normal	3.87047e-06	-0.70018	normal	3.01228e-156	1.77371	up	1.32886e-16	1.24156	up	Peptidase family M20/M25/M40
GRMZM2G017080	0.735603	-0.172682	normal	0.147878	-0.456509	normal	0.0923775	-0.635542	normal	5.04354e-07	2.64836	up	4.87911e-05	2.50966	up	alpha/beta hydrolase fold
GRMZM2G017087	0.0329467	1.02815	normal	--	--	--	0.104525	0.791876	normal	--	--	--	0.000630797	2.16772	up	KNOX2 domain
GRMZM2G017110	0.0039003	-0.475977	normal	2.23705e-52	1.72183	up	9.89267e-22	1.23369	up	0.00275145	-0.350486	normal	6.44231e-10	-0.821074	normal	Pyridoxal-dependent decarboxylase conserved domain
GRMZM2G017186	0.0281775	0.346429	normal	2.90905e-30	-1.19357	down	3.40173e-12	-0.854313	normal	0.0021699	-0.414105	normal	0.735928	-0.0586105	normal	Glycosyl hydrolase family 3 N terminal domain
GRMZM2G017229	0.0226245	-0.866805	normal	0.0949888	-0.250106	normal	0.00157524	-1.1195	down	0.000213515	-0.500229	normal	7.79939e-05	-1.3627	down	--
GRMZM2G017237	0.000252208	1.20178	up	0.78659	0.121155	normal	3.63702e-06	1.32872	up	0.335333	0.545256	normal	5.96802e-05	1.76589	up	Endonuclease/Exonuclease/phosphatase family
GRMZM2G017244	1.00457e-09	2.75696	up	0.000242318	-1.81779	down	0.0206661	0.912171	normal	0.000680431	-1.78543	down	0.0112591	0.985068	normal	PPR repeat
GRMZM2G017349	0.538741	-0.0974555	normal	0.00505976	-0.340657	normal	0.00154507	-0.446197	normal	1.67377e-12	1.09825	up	1.65779e-08	1.01055	up	Helix-loop-helix DNA-binding domain
GRMZM2G017386	1.07432e-09	1.04484	up	0.00670553	-0.363346	normal	4.96052e-05	0.675466	normal	3.60485e-20	-1.10926	down	0.806854	-0.0501428	normal	Protein kinase domain
GRMZM2G017416	0.981641	0.0108547	normal	0.000135255	1.58202	up	0.000133622	1.59697	up	0.863477	0.0920249	normal	0.834087	0.112485	normal	PIG-P
GRMZM2G017426	0.0800671	-0.38496	normal	1.08771e-05	-0.651926	normal	1.06792e-11	-1.0479	down	0.013494	0.480905	normal	0.658257	0.103636	normal	--
GRMZM2G017474	0.0306858	-1.12739	normal	0.442788	0.383576	normal	0.105948	-0.771552	normal	5.45025e-14	-2.30451	down	1.79737e-44	-3.56442	down	--
GRMZM2G017520	0.0295576	-0.528443	normal	2.17922e-10	1.4887	up	0.000777013	0.948046	normal	3.59076e-06	1.1936	up	0.0293246	0.677528	normal	Myb-like DNA-binding domain
GRMZM2G017555	4.56261e-06	3.16695	up	--	--	--	0.230258	0.740275	normal	--	--	--	1.5732e-08	4.90194	up	Pectinesterase
GRMZM2G017557	1.35882e-25	5.04786	up	--	--	--	3.54095e-25	5.81421	up	--	--	--	0.00733462	2.7213	up	O-methyltransferase domain
GRMZM2G017593	--	--	--	5.09037e-19	-4.1456	down	0.0119741	-1.06047	normal	--	--	--	--	--	--	PPR repeat
GRMZM2G017616	0.974456	0.0108272	normal	1.01682e-06	1.31453	up	2.95385e-06	1.31752	up	0.392182	0.28048	normal	0.378079	0.301658	normal	Lipoxygenase
GRMZM2G017654	0.000535308	-1.05991	down	1.04086e-05	-0.363522	normal	0.0013212	-1.37053	down	3.64099e-09	0.395905	normal	0.151697	-0.659008	normal	Protein kinase domain
GRMZM2G017670	0.099561	-0.91099	normal	0.00899451	2.09726	up	0.00161486	2.23207	up	0.00034094	-1.83117	down	5.31565e-18	-2.94957	down	--
GRMZM2G017682	3.53771e-05	-0.854292	normal	9.23372e-07	0.99186	normal	0.665243	0.129727	normal	2.70841e-06	1.16604	up	0.355326	0.326881	normal	Domain of unknown function (DUF4378)
GRMZM2G017709	3.53783e-17	2.1823	up	0.910244	-0.0521502	normal	2.61867e-18	2.12834	up	0.270106	0.584741	normal	1.13777e-21	2.81794	up	--
GRMZM2G017741	0.321049	-0.207695	normal	5.67031e-09	1.06888	up	0.000166778	0.847659	normal	1.5847e-15	1.36099	up	3.17212e-09	1.16326	up	GDP-fucose protein O-fucosyltransferase
GRMZM2G017761	3.47693e-08	-1.71392	down	1.13454e-12	2.17338	up	0.35595	0.443773	normal	4.12743e-10	2.03041	up	0.542577	0.327005	normal	Fcf1
GRMZM2G017815	0.967193	-0.0172108	normal	0.00700847	0.907325	normal	0.0106468	0.884844	normal	1.2193e-31	-2.353	down	2.64815e-26	-2.36671	down	WD domain, G-beta repeat
GRMZM2G017847	3.21498e-69	-5.38015	down	1.18153e-83	8.25823	up	--	--	--	2.15409e-86	3.91967	up	0.013212	-1.4686	normal	Actin
GRMZM2G017865	0.0129157	-0.631021	normal	4.64883e-10	-0.529566	normal	1.95273e-07	-1.16288	down	0.57082	-0.0694505	normal	0.00346975	-0.696341	normal	LIM-domain binding protein
GRMZM2G017868	2.15097e-09	-4.07842	down	1.48655e-11	4.6775	up	--	--	--	0.264362	-0.53333	normal	1.36356e-12	-5.01858	down	--
GRMZM2G017894	0.0508019	0.613884	normal	1.4988e-19	-1.8788	down	1.16045e-09	-1.26807	down	4.81913e-05	-1.0794	down	0.0879598	-0.456759	normal	Glycosyl transferase family 8
GRMZM2G017961	1.13137e-07	0.742495	normal	1.66693e-18	-1.00573	down	0.0403805	-0.270614	normal	1.77259e-07	-0.784246	normal	0.87587	-0.0337896	normal	Lon protease (S16) C-terminal proteolytic domain
GRMZM2G017966	1.17924e-256	6.1069	up	6.18191e-06	-0.921648	normal	0	5.21112	up	1.02164e-28	4.44193	up	0	10.6853	up	Translation initiation factor SUI1
GRMZM2G017982	--	--	--	3.61698e-36	-7.27608	down	1.85455e-33	-7.34135	down	2.32699e-30	-7.1032	down	1.9339e-25	-7.50118	down	Calcineurin-like phosphoesterase
GRMZM2G017991	0.000527397	1.33382	up	0.000279532	-1.74549	down	0.000406613	-0.538414	normal	0.642939	-0.202665	normal	1.54474e-10	1.19351	up	Late embryogenesis abundant protein
GRMZM2G018004	0.000948285	2.12659	up	--	--	--	0.717199	0.181036	normal	--	--	--	0.436572	0.430839	normal	--
GRMZM2G018018	0.0600131	-0.958811	normal	0.899197	-0.0606922	normal	0.0217513	-1.04296	normal	0.000803261	1.88658	up	--	--	--	Major Facilitator Superfamily
GRMZM2G018027	0.113886	-0.836099	normal	0.866912	-0.0880508	normal	0.0398908	-0.949898	normal	5.90895e-06	-1.6142	down	3.78623e-14	-2.52869	down	--
GRMZM2G018030	0.000105994	0.672195	normal	2.66561e-32	-1.37779	down	2.77002e-06	-0.709149	normal	0.752868	-0.0609108	normal	0.000273765	0.622279	normal	IQ calmodulin-binding motif
GRMZM2G018044	2.61134e-08	-2.94169	down	3.5465e-14	3.83381	up	--	--	--	3.22673e-05	2.21985	up	--	--	--	Xylanase inhibitor N-terminal
GRMZM2G018070	2.11655e-10	-2.49362	down	1.17497e-16	2.35244	up	0.71554	-0.212491	normal	3.61953e-14	2.67945	up	0.836027	0.155841	normal	Ring finger domain
GRMZM2G018082	0.271543	-0.375111	normal	0.271821	0.35177	normal	0.940649	-0.0302864	normal	2.78522e-06	1.66389	up	0.000729572	1.31479	up	Oxidoreductase family, NAD-binding Rossmann fold
GRMZM2G018177	0.0103349	0.408667	normal	5.33243e-58	-1.19601	down	8.03601e-10	-0.790749	normal	3.62541e-09	-0.49774	normal	0.64059	-0.0779249	normal	Triosephosphate isomerase
GRMZM2G018193	--	--	--	7.90938e-65	-7.16723	down	8.71789e-48	-8.33067	down	5.14414e-81	-7.95571	down	2.33146e-48	-9.43457	down	Zein seed storage protein
GRMZM2G018238	0.785822	0.150832	normal	0.00120553	1.26828	up	0.000826956	1.40566	up	0.35957	0.427677	normal	0.224615	0.592272	normal	Glutamine amidotransferase domain
GRMZM2G018251	0.0164661	-0.432949	normal	2.3114e-18	1.01233	up	0.00102281	0.565305	normal	8.89189e-14	0.979121	normal	0.00336382	0.552256	normal	short chain dehydrogenase
GRMZM2G018254	--	--	--	--	--	--	--	--	--	6.07655e-07	-3.18074	down	3.19139e-11	-5.4865	down	GRAS domain family
GRMZM2G018280	1.40111e-06	2.2782	up	--	--	--	0.113572	1.39502	normal	--	--	--	7.17762e-05	2.7912	up	Protein tyrosine and serine/threonine kinase
GRMZM2G018372	0.0326429	0.87044	normal	0.491634	0.365003	normal	0.00108122	1.24472	up	0.428667	0.547635	normal	0.0136842	1.43233	normal	Protein kinase domain
GRMZM2G018375	1.21569e-27	2.38078	up	3.81152e-05	-0.635026	normal	8.35717e-22	1.75409	up	2.37252e-20	-1.39419	down	1.67982e-07	1.01891	up	Thi4 family
GRMZM2G018464	0.000239153	-1.72684	down	5.87462e-21	5.91684	up	--	--	--	1.19394e-50	-2.63146	down	1.53813e-43	-4.41099	down	G10 protein
GRMZM2G018484	0.213713	0.613034	normal	0.00275768	-1.09724	down	0.0654536	-0.496029	normal	0.026056	1.15639	normal	2.26008e-06	1.8687	up	Pheophorbide a oxygenase
GRMZM2G018487	1.06435e-06	-1.4577	down	3.21369e-08	1.4598	up	0.9727	-0.0147955	normal	1.14369e-05	1.16424	up	0.437683	-0.29819	normal	WRKY DNA -binding domain
GRMZM2G018553	9.20903e-08	2.1939	up	0.0195396	-0.935923	normal	0.000939969	1.27084	up	0.0398515	-0.804226	normal	1.06419e-05	1.46803	up	No apical meristem (NAM) protein
GRMZM2G018558	--	--	--	2.31066e-113	-4.96638	down	1.86801e-107	-5.06587	down	--	--	--	--	--	--	Cytosol aminopeptidase family, catalytic domain
GRMZM2G018586	0.517545	0.270752	normal	1.37333e-06	1.33609	up	8.73301e-07	1.5881	up	0.230384	0.389953	normal	0.0632697	0.671786	normal	Universal stress protein family
GRMZM2G018589	6.44422e-39	2.1268	up	2.65605e-285	-3.32775	down	6.12701e-19	-1.19132	down	0.458547	-0.151609	normal	1.00581e-33	1.98963	up	K-box region
GRMZM2G018619	1.33239e-15	1.06629	up	3.26194e-14	-0.894668	normal	0.193806	0.164076	normal	0.26864	-0.208243	normal	7.85756e-08	0.86604	normal	Ras family
GRMZM2G018678	0.0083435	-0.578479	normal	3.90996e-48	4.29704	up	1.10608e-28	3.70582	up	8.99822e-20	2.9221	up	1.35308e-09	2.36554	up	--
GRMZM2G018707	0.000143217	2.33301	up	2.71579e-12	-3.32871	down	0.00632004	-0.921831	normal	4.96669e-05	-2.40264	down	0.962489	-0.0247203	normal	Plant protein of unknown function
GRMZM2G018716	5.78897e-18	-3.42571	down	2.7787e-12	1.87879	up	0.00299343	-1.55866	down	1.08363e-17	3.3551	up	--	--	--	Glycosyl hydrolases family 32 N-terminal domain
GRMZM2G018756	0.0259969	0.992893	normal	2.61522e-06	-1.67689	down	0.0436275	-0.689327	normal	--	--	--	0.0180074	1.32802	normal	Serine incorporator (Serinc)
GRMZM2G018771	0.442623	-0.260741	normal	7.01831e-10	1.58489	up	2.24076e-05	1.30599	up	0.00927403	0.690326	normal	0.183888	0.435854	normal	Polypeptide deformylase
GRMZM2G018793	1.91384e-14	5.31972	up	--	--	--	0.0299648	1.01587	normal	7.10027e-14	-5.30276	down	0.986035	0.0100449	normal	--
GRMZM2G018820	9.42295e-24	1.64653	up	4.70212e-175	-1.91075	down	0.121876	-0.257169	normal	0.00764376	0.236215	normal	4.06596e-36	1.89737	up	Glycerophosphoryl diester phosphodiesterase family
GRMZM2G018849	0.000125659	1.65521	up	0.00106604	1.64037	up	1.01826e-17	3.38646	up	0.00977552	-1.04751	down	0.0764125	0.660311	normal	Putative S-adenosyl-L-methionine-dependent methyltransferase
GRMZM2G018923	0.000429617	-0.75765	normal	3.05896e-05	0.988445	normal	0.492911	0.22562	normal	2.42092e-23	2.57473	up	3.88202e-09	1.83275	up	Mannosyltransferase (PIG-V)
GRMZM2G018941	0.000612971	0.586665	normal	1.21458e-12	-0.62676	normal	0.812746	-0.0449344	normal	8.86737e-08	0.563253	normal	3.50155e-13	1.15844	up	ETC complex I subunit conserved region
GRMZM2G018946	--	--	--	--	--	--	--	--	--	0.0205496	-1.34244	normal	0.00131003	-1.9027	down	Replication protein A C terminal
GRMZM2G018947	0.0332758	-0.335788	normal	0.446542	0.106644	normal	0.145859	-0.238054	normal	2.8145e-13	1.0983	up	2.04085e-05	0.771479	normal	DEAD/DEAH box helicase
GRMZM2G018951	9.46386e-08	1.67907	up	0.915919	0.0451943	normal	1.85345e-08	1.72154	up	0.0291151	1.03618	normal	6.57259e-15	2.77855	up	Kinesin motor domain
GRMZM2G018971	0.0512121	-0.526428	normal	0.00297604	-0.632526	normal	2.28924e-08	-1.17209	down	8.40137e-06	-0.994341	normal	2.83126e-11	-1.52131	down	Magnesium transporter NIPA
GRMZM2G018974	0.0018093	-2.19581	down	2.98221e-09	3.08191	up	--	--	--	0.20189	-0.572515	normal	3.69498e-05	-2.90873	down	PPR repeat family
GRMZM2G018984	0.0001108	1.74899	up	0.000806103	-1.56774	down	0.762405	0.147947	normal	--	--	--	1.62803e-14	6.0883	up	AP2 domain
GRMZM2G018988	5.54485e-05	2.95061	up	3.04605e-07	-3.38396	down	0.219341	-0.420403	normal	3.22797e-05	-2.86985	down	0.332717	0.363665	normal	BAG domain
GRMZM2G018992	0.000135221	1.62503	up	0.043242	-0.864639	normal	0.00480057	0.783054	normal	0.897739	-0.0824441	normal	3.2425e-07	1.61997	up	PDDEXK-like family of unknown function
GRMZM2G019166	0.36235	0.412499	normal	0.0540337	-0.587092	normal	0.656255	-0.174156	normal	0.0425254	0.800868	normal	0.00177971	1.23715	up	--
GRMZM2G019183	0.0045952	-0.404814	normal	0.00473084	-0.340677	normal	7.95787e-07	-0.752468	normal	2.15833e-24	-1.00009	down	1.33603e-25	-1.39623	down	Glycosyltransferase family 20
GRMZM2G019200	7.25854e-06	0.755117	normal	7.04324e-16	-0.986321	normal	0.16423	-0.236922	normal	4.00693e-32	-1.40332	down	4.32352e-05	-0.635783	normal	Chromatin associated protein KTI12
GRMZM2G019280	4.17087e-13	5.10374	up	--	--	--	3.47927e-12	4.97455	up	--	--	--	1.42532e-11	5.56446	up	--
GRMZM2G019284	0.947909	0.0152166	normal	0.00593181	0.319267	normal	0.0495101	0.324283	normal	2.26416e-41	1.58937	up	4.74345e-25	1.61046	up	--
GRMZM2G019317	1.64951e-18	-1.36816	down	0.00100515	0.402391	normal	3.90761e-14	-0.979314	normal	6.39327e-19	1.2499	up	0.586574	-0.112488	normal	Protein kinase domain
GRMZM2G019325	0.0233392	-0.389598	normal	5.22884e-29	1.11066	up	1.04363e-05	0.706206	normal	3.72446e-23	-0.809808	normal	7.93141e-17	-1.19066	down	Ribosomal_S17 N-terminal
GRMZM2G019328	0.0168259	1.34987	normal	--	--	--	1.23641e-10	4.70509	up	--	--	--	0.283665	0.629307	normal	--
GRMZM2G019358	1.43715e-12	1.46717	up	0.738131	-0.0923954	normal	4.39054e-13	1.36922	up	0.00783323	-0.664703	normal	0.000109959	0.811569	normal	Complex I intermediate-associated protein 30 (CIA30)
GRMZM2G019404	1.48163e-37	-1.43078	down	1.66308e-75	0.991154	normal	3.41897e-05	-0.45296	normal	4.78194e-28	0.650854	normal	4.24928e-12	-0.775554	normal	E1-E2 ATPase
GRMZM2G019413	5.9924e-07	-1.55843	down	3.75511e-09	3.11036	up	1.28296e-06	1.86	up	0.000712057	1.60737	up	0.715592	0.140845	normal	Nodulin-like
GRMZM2G019515	5.34978e-07	1.81102	up	0.687549	-0.15609	normal	4.91301e-14	1.7008	up	0.888088	0.0666628	normal	1.59415e-14	1.9495	up	Flavin-binding monooxygenase-like
GRMZM2G019562	0.000489036	-0.624222	normal	0.0615521	0.304067	normal	0.0647312	-0.330219	normal	0.000101596	-0.578918	normal	3.61722e-14	-1.19794	down	Diacylglycerol kinase accessory domain
GRMZM2G019571	0.00235802	-1.7726	down	4.25172e-05	2.66219	up	--	--	--	0.911226	0.0795047	normal	--	--	--	PPR repeat family
GRMZM2G019586	1.14736e-37	3.49303	up	0.798777	-0.120996	normal	7.90523e-54	3.39809	up	0.00370896	1.53307	up	6.05171e-81	5.19905	up	--
GRMZM2G019619	0.0206074	0.668698	normal	5.48357e-05	-1.01809	down	0.129662	-0.360862	normal	0.330026	-0.346315	normal	0.264604	0.33011	normal	Glycosyl hydrolases family 17
GRMZM2G019626	1.06397e-05	-1.72825	down	0.151068	0.414508	normal	0.00135232	-1.32743	down	1.61434e-13	2.64844	up	0.151265	0.878252	normal	Domain of unknown function (DUF1719)
GRMZM2G019641	--	--	--	--	--	--	--	--	--	1.42618e-22	-4.03438	down	1.51287e-09	-3.63144	down	--
GRMZM2G019695	0.00113514	1.08555	up	0.203188	-0.359428	normal	0.00632085	0.732297	normal	0.347388	0.319519	normal	2.20084e-07	1.43711	up	--
GRMZM2G019721	0.00727727	0.562622	normal	0.00218219	-0.509545	normal	0.851012	0.0459571	normal	1.72673e-18	2.78452	up	4.25476e-23	3.36517	up	--
GRMZM2G019744	0.253542	0.488569	normal	0.00799466	1.20392	up	6.33392e-06	1.72063	up	0.969875	0.0206927	normal	0.176301	0.528302	normal	Ulp1 protease family, C-terminal catalytic domain
GRMZM2G019746	0.101634	-0.730546	normal	0.000649644	1.50176	up	0.134939	0.771018	normal	0.0597359	-0.72147	normal	0.000114301	-1.4732	down	AMP-binding enzyme
GRMZM2G019777	0.00954294	-1.0944	down	1.02681e-05	1.90426	up	--	--	--	0.254417	0.539656	normal	0.344227	-0.542155	normal	U-box domain
GRMZM2G019799	0.115207	-0.501542	normal	4.90575e-10	1.32576	up	0.0136093	0.795481	normal	1.3609e-10	1.55574	up	0.0022129	1.05004	up	Molybdopterin-binding domain of aldehyde dehydrogenase
GRMZM2G019810	5.48616e-14	2.20928	up	2.12605e-10	-1.89964	down	0.282776	0.295971	normal	0.151767	1.01784	normal	1.41297e-08	3.20842	up	--
GRMZM2G019819	0.0562403	-0.6366	normal	5.96711e-06	-0.908003	normal	2.23782e-11	-1.56061	down	0.758901	0.091126	normal	0.0542951	-0.55031	normal	Protein phosphatase 2C
GRMZM2G019866	0.00154606	0.700946	normal	0.00128932	0.760179	normal	2.65856e-13	1.45843	up	0.171845	0.371356	normal	3.02204e-07	1.08779	up	Phosphopantetheine attachment site
GRMZM2G019872	1.04362e-10	4.69796	up	--	--	--	0.00867443	1.41007	up	--	--	--	0.00911204	2.40507	up	Zinc-binding dehydrogenase
GRMZM2G019958	8.83981e-05	-1.3986	down	0.631732	0.175356	normal	0.00149205	-1.22341	down	0.751845	0.140258	normal	0.00359701	-1.25233	down	AhpC/TSA antioxidant enzyme
GRMZM2G019971	0.0015727	-0.740444	normal	4.85883e-59	-2.30466	down	7.52081e-72	-3.05347	down	8.31016e-07	-0.952973	normal	1.46265e-15	-1.69187	down	zinc-RING finger domain
GRMZM2G019991	4.33374e-15	1.30684	up	0.0302866	0.365948	normal	3.06243e-27	1.66674	up	0.1966	-0.215354	normal	3.18931e-15	1.10747	up	--
GRMZM2G020002	1.59294e-10	-1.2227	down	4.35399e-06	0.739302	normal	0.0152814	-0.495272	normal	0.0065756	0.569125	normal	0.0131133	-0.644163	normal	Amidohydrolase family
GRMZM2G020043	3.00908e-05	-1.92898	down	0.0094915	1.04933	up	--	--	--	0.10624	0.780909	normal	--	--	--	--
GRMZM2G020054	7.42189e-05	2.34829	up	--	--	--	0.00117041	1.98422	up	5.85208e-12	-3.30077	down	0.0985197	-0.833127	normal	AP2 domain
GRMZM2G020140	5.71004e-11	1.04965	up	1.12279e-05	-0.587144	normal	0.0027591	0.456172	normal	0.500171	-0.141145	normal	4.21989e-07	0.917374	normal	Yip1 domain
GRMZM2G020148	0.0142823	1.03678	normal	0.497644	-0.29483	normal	0.00118529	0.7667	normal	9.35296e-06	2.69184	up	8.93887e-13	3.92329	up	TLC domain
GRMZM2G020150	2.09954e-08	3.09775	up	1.46684e-07	-2.77852	down	0.485507	0.337916	normal	3.03879e-12	-3.47793	down	0.555092	-0.289338	normal	AP2 domain
GRMZM2G020151	--	--	--	0.000397443	-1.47102	down	3.83834e-19	-5.95129	down	0.0256977	-1.12973	normal	6.45355e-14	-5.98098	down	--
GRMZM2G020156	0.0997026	0.56862	normal	0.178178	0.478517	normal	0.00186415	1.0396	up	0.964628	-0.0240421	normal	0.242297	0.546927	normal	NPH3 family
GRMZM2G020196	0.0639416	-0.438518	normal	9.5438e-07	-0.81528	normal	2.07862e-15	-1.26705	down	0.776455	0.0744204	normal	0.100062	-0.357903	normal	U-box domain
GRMZM2G020302	0.137782	0.490989	normal	3.55318e-13	-1.54041	down	2.70917e-05	-1.04666	down	0.0104956	-0.774282	normal	0.455367	-0.273934	normal	--
GRMZM2G020423	1.69635e-06	-1.57759	down	0.634643	0.140518	normal	8.88409e-06	-1.45198	down	3.18169e-33	-2.10906	down	2.80868e-60	-3.71912	down	--
GRMZM2G020468	2.32977e-12	5.00087	up	--	--	--	0.00224282	1.69687	up	--	--	--	0.433609	0.456825	normal	--
GRMZM2G020471	--	--	--	--	--	--	--	--	--	1.58733e-53	-5.74733	down	8.04092e-40	-7.53389	down	--
GRMZM2G020484	0.730568	-0.0759041	normal	0.151221	0.163472	normal	0.643971	0.0777755	normal	2.37696e-32	1.35181	up	4.91693e-18	1.2816	up	POT family
GRMZM2G020500	3.81617e-08	1.98707	up	0.0888316	-0.609887	normal	3.44119e-12	1.4221	up	0.040672	0.877822	normal	2.6211e-37	2.98802	up	Cytochrome P450
GRMZM2G020514	0.0822409	0.870746	normal	--	--	--	0.0453293	0.901798	normal	--	--	--	3.02186e-12	5.40428	up	--
GRMZM2G020523	3.98343e-27	2.43283	up	2.18257e-06	-1.20133	down	2.16703e-09	1.22155	up	4.14673e-21	-2.12352	down	0.139177	0.322298	normal	Peroxidase
GRMZM2G020544	0.924559	0.0265881	normal	0.278314	0.186783	normal	0.366521	0.203717	normal	3.36681e-17	-1.09713	down	3.6515e-09	-1.05991	down	Ras family
GRMZM2G020556	0.0306296	-0.95119	normal	0.0230743	0.637784	normal	0.471149	-0.34452	normal	0.0040877	2.46861	up	9.34742e-07	3.83039	up	--
GRMZM2G020661	0.0900523	0.322163	normal	7.71819e-31	-1.33558	down	1.56838e-12	-1.01896	down	2.44803e-15	-1.02689	down	7.9236e-06	-0.69476	normal	Ras family
GRMZM2G020666	0.92679	-0.0809685	normal	0.0336869	1.37701	normal	3.23421e-12	1.56565	up	0.0454216	1.39209	normal	1.49648e-08	1.58425	up	Proteolipid membrane potential modulator
GRMZM2G020704	2.85435e-93	-5.92345	down	1.99377e-17	1.44399	up	2.19233e-42	-4.48332	down	1.52066e-09	1.03123	up	1.41946e-51	-4.93782	down	YT521-B-like domain
GRMZM2G020728	1.14144e-14	-2.35315	down	9.74615e-20	1.98484	up	0.358975	-0.406383	normal	7.39501e-19	1.93557	up	0.32783	-0.445773	normal	G10 protein
GRMZM2G020761	0.111709	-0.371131	normal	0.590684	0.125617	normal	0.283359	-0.253599	normal	1.98719e-20	2.67278	up	4.65266e-13	2.32705	up	Cytochrome P450
GRMZM2G020766	0.153862	-0.518064	normal	0.22273	0.246455	normal	0.43742	-0.287793	normal	1.18056e-17	-1.27158	down	8.76912e-10	-1.77174	down	K+ potassium transporter
GRMZM2G020814	0.0428628	-0.329602	normal	5.06308e-07	-0.507315	normal	2.12523e-14	-0.846889	normal	1.5042e-19	-0.958996	normal	5.54891e-24	-1.28113	down	Ring finger domain
GRMZM2G020826	0.00026203	1.8543	up	--	--	--	5.22842e-06	2.109	up	--	--	--	0.000675554	1.8285	up	linker histone H1 and H5 family
GRMZM2G020840	0.00231605	1.10546	up	5.4043e-11	-2.06639	down	0.00128683	-0.976634	normal	0.405149	-0.439735	normal	0.101933	0.66485	normal	--
GRMZM2G020843	3.11486e-10	1.70994	up	0.000889314	-0.850101	normal	1.44462e-05	0.866964	normal	0.239879	-0.378492	normal	1.22167e-10	1.36395	up	Protein of unknown function (DUF3755)
GRMZM2G020912	0.0144936	-0.523045	normal	7.03176e-11	-0.55561	normal	1.0133e-08	-1.08286	down	0.96063	-0.00617617	normal	0.00941096	-0.523793	normal	Protein of unknown function (DUF789)
GRMZM2G020938	0.700276	-0.153307	normal	0.192438	0.494734	normal	0.388931	0.338345	normal	0.00196786	1.21386	up	0.00347478	1.09492	up	Protein kinase domain
GRMZM2G020986	0.0153873	0.875053	normal	7.31454e-11	-1.09122	down	0.611357	-0.189497	normal	5.0144e-15	-1.33628	down	0.238382	-0.415168	normal	Leucine rich repeat
GRMZM2G021170	0.277354	0.39	normal	0.769289	-0.0810905	normal	0.382701	0.302214	normal	3.61769e-06	-1.11746	down	0.0349284	-0.71013	normal	Putative tRNA binding domain
GRMZM2G021194	4.38071e-08	-0.884759	normal	1.01318e-35	1.21284	up	0.0745397	0.311517	normal	3.97571e-21	0.977076	normal	0.641787	0.0949178	normal	Calcium-dependent channel, 7TM region, putative phosphate
GRMZM2G021270	0.000167397	-0.756363	normal	3.14105e-07	0.580381	normal	0.387735	-0.190774	normal	9.86182e-50	-1.30129	down	6.09098e-34	-2.0476	down	DNA gyrase/topoisomerase IV, subunit A
GRMZM2G021339	7.78474e-05	1.11249	up	0.0392554	-0.57041	normal	0.0220708	0.538897	normal	0.216146	-0.44473	normal	0.0271448	0.676738	normal	Homeobox associated leucine zipper
GRMZM2G021369	0.0635108	-0.812192	normal	0.00374743	1.34095	up	0.324557	0.542547	normal	0.0253779	1.0724	normal	0.621322	0.287907	normal	AP2 domain
GRMZM2G021406	0.0717187	0.823494	normal	0.0174121	1.3446	normal	3.46416e-06	2.21495	up	0.578685	-0.296033	normal	0.101917	0.559413	normal	Possible lysine decarboxylase
GRMZM2G021416	0.000456457	-1.20821	down	0.00122435	0.954904	normal	0.543376	-0.267445	normal	0.176401	-0.420865	normal	3.73878e-06	-1.63356	down	Protein kinase domain
GRMZM2G021439	0.519227	0.21092	normal	0.00615335	0.939863	normal	0.000366363	1.14842	up	0.0523864	-0.612988	normal	0.207999	-0.399114	normal	Repair protein Rad1/Rec1/Rad17
GRMZM2G021475	2.30911e-14	-5.30342	down	3.00602e-07	3.01126	up	--	--	--	0.00172209	1.73625	up	--	--	--	PRONE (Plant-specific Rop nucleotide exchanger)
GRMZM2G021480	0.149015	-0.94131	normal	--	--	--	0.000435413	1.64609	up	--	--	--	0.000113103	2.01667	up	Ring finger domain
GRMZM2G021482	0.0472523	1.5881	normal	--	--	--	0.0329899	1.78459	normal	--	--	--	6.56849e-05	3.01328	up	Glycerophosphoryl diester phosphodiesterase family
GRMZM2G021498	0.474947	0.255379	normal	0.0355649	0.733708	normal	0.00187508	0.987252	normal	0.024269	0.913819	normal	0.00118289	1.19732	up	Ring finger domain
GRMZM2G021514	1.42266e-35	-6.61599	down	0.737802	0.0813937	normal	2.96256e-35	-6.60414	down	2.48882e-34	4.35498	up	--	--	--	Sugar-tranasporters, 12 TM
GRMZM2G021517	1.23678e-07	0.772592	normal	2.52354e-10	-0.718928	normal	0.767777	0.0472757	normal	0.034875	0.288697	normal	4.68963e-16	1.07299	up	Protein kinase domain
GRMZM2G021589	0.903674	-0.0407026	normal	2.01815e-05	1.28143	up	9.11075e-05	1.23319	up	8.61493e-64	-2.58198	down	5.91498e-54	-2.61878	down	TLC domain
GRMZM2G021610	0.743284	-0.114167	normal	0.000226227	1.04986	up	0.0049887	0.921603	normal	0.247753	-0.322222	normal	0.162437	-0.42873	normal	Protein phosphatase 2C
GRMZM2G021614	0.000309736	-0.979886	normal	8.18759e-09	1.14103	up	0.501239	0.141952	normal	0.345306	-0.347103	normal	2.5307e-12	-1.34717	down	Phosphatidylethanolamine-binding protein
GRMZM2G021624	0.0786365	0.871283	normal	--	--	--	8.99915e-05	1.92354	up	0.0491272	-0.980207	normal	0.843139	-0.109169	normal	Protein kinase domain
GRMZM2G021661	5.77136e-14	2.27245	up	0.04181	1.07588	normal	8.3165e-25	3.40239	up	0.845817	0.119871	normal	2.90467e-17	2.44054	up	--
GRMZM2G021687	0.866673	0.0884056	normal	0.00136062	1.4487	up	0.000524117	1.54563	up	0.0651473	0.977955	normal	0.0402218	1.10091	normal	--
GRMZM2G021794	7.60388e-11	1.59863	up	0.00448591	-0.77133	normal	0.000221292	0.819034	normal	4.12096e-16	-1.85495	down	0.290681	-0.244391	normal	Fasciclin domain
GRMZM2G021816	0.654102	0.138801	normal	7.64291e-06	1.05631	up	3.44528e-07	1.1901	up	0.020173	-0.495865	normal	0.103351	-0.350112	normal	Activator of Hsp90 ATPase, N-terminal
GRMZM2G021846	0.000754633	-0.582154	normal	2.22776e-32	1.45642	up	5.81219e-07	0.858726	normal	0.0568517	0.255362	normal	0.0818274	-0.320674	normal	6-phosphofructo-2-kinase
GRMZM2G021885	1.09109e-06	1.04741	up	0.0142134	-0.471173	normal	0.000431033	0.574224	normal	0.653576	-0.119248	normal	3.66929e-07	0.945544	normal	--
GRMZM2G021921	0.938229	-0.0229745	normal	1.33148e-12	1.68144	up	4.9968e-13	1.65707	up	0.11639	0.389271	normal	0.112247	0.377653	normal	Fanconi anaemia protein FancD2 nuclease
GRMZM2G021973	0.0424574	1.56489	normal	0.00126297	-2.09148	down	0.264356	-0.522529	normal	--	--	--	0.0272422	1.39232	normal	--
GRMZM2G021998	8.41363e-25	1.29153	up	1.78031e-36	-1.1253	down	0.101959	0.161033	normal	0.0289976	-0.245602	normal	1.60329e-26	1.059	up	--
GRMZM2G022014	1.11421e-06	1.08003	up	2.75586e-19	-1.39963	down	0.113933	-0.319664	normal	0.0114384	-0.546239	normal	0.0130715	0.546993	normal	Small subunit of serine palmitoyltransferase-like
GRMZM2G022052	1.15093e-09	-1.44973	down	8.31262e-06	0.82698	normal	0.0169211	-0.637324	normal	0.15481	0.347002	normal	0.000188717	-1.09761	down	hTAFII28-like protein conserved region
GRMZM2G022090	0.0438682	0.472796	normal	0.00136414	-0.5014	normal	0.891208	-0.0341106	normal	1.1845e-05	0.851909	normal	7.9988e-10	1.33564	up	--
GRMZM2G022188	0.47301	0.360017	normal	7.31796e-12	-1.8138	down	5.37398e-05	-1.42383	down	2.98967e-18	-2.1324	down	1.47163e-07	-1.735	down	WD domain, G-beta repeat
GRMZM2G022213	3.09995e-10	-1.40531	down	1.4303e-07	0.911627	normal	0.062326	-0.506402	normal	0.863026	-0.0376631	normal	4.59609e-10	-1.44149	down	Zinc finger, C2H2 type
GRMZM2G022229	1.43831e-06	1.48658	up	0.45619	0.291584	normal	1.79323e-12	1.79371	up	0.0603409	-0.663877	normal	0.00129301	0.842637	normal	Peptidase M76 family
GRMZM2G022266	0.00660164	-1.43485	down	0.0701077	0.791095	normal	0.13418	-0.703338	normal	0.134999	0.715698	normal	0.129457	-0.776318	normal	UDP-glucoronosyl and UDP-glucosyl transferase
GRMZM2G022313	0.720939	0.0698065	normal	1.12734e-44	-1.22556	down	9.81897e-20	-1.16083	down	0.047019	-0.27024	normal	0.297625	-0.192222	normal	RNA recognition motif. (a.k.a. RRM, RBD, or RNP domain)
GRMZM2G022318	3.6687e-07	1.26109	up	0.567575	-0.15174	normal	2.84139e-08	1.11005	up	0.205439	-0.342492	normal	6.63857e-06	0.93806	normal	Heavy-metal-associated domain
GRMZM2G022398	0.197919	0.595046	normal	0.0681039	1.04435	normal	0.00253564	1.62996	up	0.807505	-0.140115	normal	0.287746	0.472369	normal	Exostosin family
GRMZM2G022402	0.0187036	-0.819707	normal	3.24903e-06	1.58937	up	0.0777039	0.758369	normal	3.23629e-07	2.01331	up	0.0133046	1.21519	normal	GDSL-like Lipase/Acylhydrolase
GRMZM2G022413	0.184381	0.608562	normal	0.00580466	1.26718	up	0.000527485	1.81304	up	0.177679	-0.477141	normal	0.763498	0.154732	normal	Peptide methionine sulfoxide reductase
GRMZM2G022442	--	--	--	--	--	--	--	--	--	2.98612e-14	-4.07972	down	1.73483e-17	-4.43944	down	Protein of unknown function (DUF563)
GRMZM2G022453	0.658399	0.215162	normal	0.0229663	-0.805537	normal	0.158572	-0.591096	normal	0.0025698	-1.02259	down	0.0400517	-0.800672	normal	--
GRMZM2G022506	0.00217848	-0.847002	normal	0.0152221	0.493164	normal	0.220738	-0.367717	normal	1.67077e-05	1.02419	up	0.635984	0.17978	normal	--
GRMZM2G022547	0.85472	0.0394752	normal	5.44006e-15	0.892485	normal	9.82501e-11	0.922001	normal	1.91677e-66	1.98977	up	1.61267e-48	2.038	up	Ferric reductase NAD binding domain
GRMZM2G022563	9.89601e-10	1.0587	up	1.76473e-07	-0.800272	normal	0.150401	0.2518	normal	9.38201e-12	-1.07189	down	0.992001	-0.00213674	normal	3-Oxoacyl-[acyl-carrier-protein (ACP)] synthase III C terminal
GRMZM2G022629	0.000732764	1.05506	up	0.000266954	1.18155	up	2.2691e-11	2.21803	up	0.100199	0.564018	normal	3.9131e-07	1.64049	up	--
GRMZM2G022642	4.94985e-20	1.51839	up	0.318244	0.258628	normal	6.80486e-21	1.76623	up	0.550605	0.179921	normal	6.1102e-19	1.71033	up	Amino acid permease
GRMZM2G022645	0.00574214	-1.19866	down	0.0115755	0.882483	normal	0.210869	-0.359438	normal	0.506234	0.428773	normal	0.0200961	-0.773571	normal	Protein kinase domain
GRMZM2G022651	0.932482	0.0400622	normal	0.0184059	0.679848	normal	0.060139	0.699697	normal	2.10977e-05	1.5199	up	0.00023709	1.56602	up	--
GRMZM2G022710	1.48731e-12	5.01231	up	--	--	--	1.11152e-11	4.88506	up	--	--	--	4.33237e-11	5.46785	up	--
GRMZM2G022763	5.4678e-100	-2.44548	down	0.480279	0.0629343	normal	1.45079e-138	-2.39576	down	2.63438e-70	1.38988	up	1.29544e-21	-1.05337	down	RNA recognition motif. (a.k.a. RRM, RBD, or RNP domain)
GRMZM2G022782	0.00911067	-0.886021	normal	0.338023	0.312375	normal	0.106775	-0.581767	normal	3.20953e-07	-1.37586	down	1.55155e-13	-2.26796	down	Alkaline and neutral invertase
GRMZM2G022799	0.706669	-0.392394	normal	0.698246	-0.354513	normal	4.12791e-10	-1.75907	down	0.903424	-0.132923	normal	0.000435136	-1.19678	down	Caspase domain
GRMZM2G022804	0.0867469	-0.840445	normal	8.17645e-13	4.88503	up	--	--	--	0.108234	-0.711962	normal	0.000309206	-1.58131	down	--
GRMZM2G022820	8.01071e-08	0.837853	normal	3.23587e-05	-0.467509	normal	0.00908304	0.364132	normal	0.0906644	0.301009	normal	3.25774e-10	1.14779	up	Formin Homology 2 Domain
GRMZM2G022866	2.38416e-23	-2.71434	down	0.0708743	0.378095	normal	1.4776e-14	-2.3366	down	5.96893e-06	1.15781	up	0.00011128	-1.54028	down	Glutathione S-transferase, N-terminal domain
GRMZM2G022876	9.98526e-05	-1.18191	down	0.118957	0.397377	normal	0.000976741	-0.808956	normal	0.0510125	0.621107	normal	0.126344	-0.557013	normal	--
GRMZM2G022892	0.308579	0.885949	normal	--	--	--	1.15498e-10	4.70378	up	--	--	--	3.51042e-10	5.28129	up	Ankyrin repeats (3 copies)
GRMZM2G022915	0.0897712	-0.232265	normal	3.99405e-12	-0.523781	normal	1.8013e-17	-0.765188	normal	1.21928e-34	1.03518	up	3.91717e-15	0.810917	normal	Ankyrin repeats (3 copies)
GRMZM2G022945	0.895076	-0.0561066	normal	0.390839	0.316468	normal	0.474155	0.254726	normal	0.000159594	-1.08347	down	1.54282e-05	-1.14498	down	BRCA1 C Terminus (BRCT) domain
GRMZM2G022958	4.07631e-07	-2.61422	down	0.000624219	2.60926	up	--	--	--	7.76098e-12	3.55579	up	--	--	--	--
GRMZM2G022979	1.51038e-10	-2.74342	down	2.33583e-25	6.08521	up	--	--	--	2.8823e-07	1.77209	up	0.139733	-0.984527	normal	--
GRMZM2G022984	0.0240012	1.44871	normal	--	--	--	0.00896697	1.56627	up	--	--	--	4.61425e-05	3.43273	up	--
GRMZM2G023028	4.14589e-05	1.44391	up	0.0048636	-1.21866	down	0.702979	0.173457	normal	0.931248	0.0734446	normal	0.0232871	1.44326	normal	Transcription factor S-II (TFIIS)
GRMZM2G023068	0.000522152	-1.2604	down	0.197378	0.3948	normal	0.0094881	-0.887623	normal	4.77707e-09	1.92933	up	0.135775	0.664996	normal	Mitochondrial ribosomal protein L27
GRMZM2G023071	0.296538	-0.42413	normal	0.00428126	1.06599	up	0.15379	0.632787	normal	0.0433468	0.905542	normal	0.351626	0.501997	normal	PPR repeat family
GRMZM2G023190	7.69926e-10	-2.53043	down	0.0189676	0.941072	normal	--	--	--	8.83888e-07	2.00263	up	--	--	--	F-box domain
GRMZM2G023204	0.0173085	-1.21516	normal	3.3532e-06	1.98778	up	--	--	--	0.0418641	0.902942	normal	0.528777	-0.346317	normal	Protein kinase domain
GRMZM2G023232	0.719209	-0.0524254	normal	9.19739e-63	-1.14025	down	2.3041e-37	-1.20019	down	1.0544e-35	-0.949039	normal	2.91111e-21	-0.992301	normal	Hsp70 protein
GRMZM2G023237	0.0927016	1.00559	normal	--	--	--	2.21708e-07	3.52891	up	--	--	--	0.0100034	1.59104	normal	Glutaredoxin
GRMZM2G023275	5.28289e-13	-1.39699	down	2.67945e-08	1.00371	up	0.0792875	-0.403252	normal	0.0142984	0.512775	normal	0.000251572	-0.876992	normal	PB1 domain
GRMZM2G023279	0.0723294	-0.537766	normal	0.00610137	-0.601367	normal	8.45231e-11	-1.16101	down	0.0150827	-0.610698	normal	5.35118e-07	-1.15371	down	--
GRMZM2G023293	4.39094e-06	-1.78765	down	0.00149097	1.18408	up	--	--	--	0.00159265	1.48808	up	--	--	--	--
GRMZM2G023313	2.04991e-08	-1.11575	down	0.0898737	0.2315	normal	2.30001e-05	-0.893343	normal	4.37255e-06	0.611806	normal	0.0283974	-0.50365	normal	--
GRMZM2G023346	0.159281	-0.736506	normal	0.398	0.468066	normal	0.675148	-0.258208	normal	0.31814	-0.484482	normal	0.00218543	-1.26444	down	NPH3 family
GRMZM2G023347	0.000159049	0.90956	normal	2.65595e-07	-0.882037	normal	0.913919	0.0271845	normal	6.33014e-07	-1.07998	down	0.592261	-0.159081	normal	Prefoldin subunit
GRMZM2G023422	0.00805805	-0.662244	normal	2.6218e-10	1.53867	up	0.00178213	0.867772	normal	0.114279	-0.382739	normal	1.53685e-05	-1.04244	down	DNA polymerase family A
GRMZM2G023436	0.0698777	0.692903	normal	2.69175e-06	-1.33387	down	0.0126821	-0.648129	normal	5.75694e-11	-1.84748	down	1.04776e-05	-1.15105	down	Ras family
GRMZM2G023471	1.86965e-19	-5.93143	down	0.0108736	1.48337	normal	--	--	--	4.4337e-05	1.80631	up	--	--	--	U6-snRNA interacting domain of PrP8
GRMZM2G023520	0.0655855	0.419577	normal	0.344692	-0.142679	normal	0.0988274	0.27078	normal	2.7446e-05	0.668388	normal	4.7112e-10	1.09936	up	Protein of unknown function, DUF538
GRMZM2G023591	0.502032	-0.273049	normal	2.89703e-07	2.00153	up	8.40113e-05	1.71498	up	0.757012	0.130652	normal	0.76208	-0.13561	normal	RNA recognition motif. (a.k.a. RRM, RBD, or RNP domain)
GRMZM2G023711	2.94527e-09	-1.32571	down	2.59478e-22	1.90453	up	0.0653855	0.557734	normal	6.09884e-16	1.9446	up	0.0877747	0.624901	normal	Thioredoxin
GRMZM2G023715	0.000234115	-0.901018	normal	0.245264	0.259147	normal	0.00189411	-0.656636	normal	5.15987e-09	1.49424	up	0.044048	0.605926	normal	Protein tyrosine and serine/threonine kinase
GRMZM2G023748	0.0256682	0.452852	normal	2.3843e-07	0.716344	normal	1.40756e-09	1.15597	up	3.09761e-14	-0.816328	normal	0.0619949	-0.349691	normal	Ribosomal protein L1p/L10e family
GRMZM2G023755	0.000235235	0.416034	normal	0.000635996	0.288749	normal	1.69749e-10	0.695527	normal	1.38092e-110	2.13548	up	3.15577e-103	2.55875	up	Protein of unknown function (DUF3675)
GRMZM2G023786	4.97139e-25	6.55081	up	7.27042e-17	-5.47436	down	0.00310469	0.996612	normal	--	--	--	8.67668e-21	5.74302	up	DnaJ domain
GRMZM2G023791	0.718254	-0.116527	normal	0.746146	0.0677553	normal	0.833659	-0.059496	normal	1.66824e-11	1.38649	up	4.70524e-07	1.2753	up	--
GRMZM2G023827	--	--	--	--	--	--	--	--	--	4.95748e-22	-3.66382	down	6.4097e-20	-3.42061	down	Domain of unknown function
GRMZM2G023847	1.61086e-18	-3.96506	down	7.73519e-09	1.9226	up	--	--	--	7.34895e-05	2.27627	up	--	--	--	Plastocyanin-like domain
GRMZM2G023863	4.14026e-08	-1.81067	down	4.31058e-32	5.94775	up	7.932e-10	4.00123	up	0.289579	0.339013	normal	6.8202e-06	-1.48917	down	--
GRMZM2G023899	6.74679e-22	6.23879	up	--	--	--	2.78078e-16	4.78389	up	--	--	--	2.4086e-11	4.04069	up	P21-Rho-binding domain
GRMZM2G023946	6.90681e-05	-1.65186	down	4.52949e-15	-1.65473	down	2.62374e-27	-3.333	down	0.580685	-0.218844	normal	2.01039e-05	-1.88322	down	Protein of unknown function (DUF1624)
GRMZM2G023952	0.00985836	-1.48672	down	0.424179	0.387296	normal	--	--	--	0.507431	0.45989	normal	--	--	--	Cytochrome P450
GRMZM2G023970	0.000513543	-0.794166	normal	0.000863477	-0.456644	normal	9.17261e-10	-1.25842	down	0.000120527	0.707852	normal	0.791823	-0.0839853	normal	Pex2 / Pex12 amino terminal region
GRMZM2G023983	1.91725e-06	-1.13641	down	6.65807e-07	0.951133	normal	0.517245	-0.199346	normal	0.000398473	0.799941	normal	0.327386	-0.329296	normal	Type II intron maturase
GRMZM2G023986	2.52344e-10	-3.43625	down	9.21814e-16	5.30787	up	--	--	--	2.86404e-05	2.84469	up	--	--	--	Glycosyl hydrolase family 3 N terminal domain
GRMZM2G024005	--	--	--	--	--	--	--	--	--	0.000189205	-1.62298	down	3.89667e-07	-2.32541	down	Plants and Prokaryotes Conserved (PCC) domain
GRMZM2G024025	5.87208e-33	-7.2082	down	1.12963e-32	6.97912	up	--	--	--	3.67226e-13	2.00154	up	2.73083e-12	-5.68817	down	--
GRMZM2G024038	0.969055	0.0215588	normal	0.013299	1.28511	normal	0.0119099	1.31644	normal	2.57238e-07	3.60805	up	7.87174e-07	3.85878	up	--
GRMZM2G024099	0.875611	0.108205	normal	0.0433574	0.958305	normal	0.000463434	1.12041	up	0.494432	0.540678	normal	0.0519761	0.768284	normal	Xylanase inhibitor C-terminal
GRMZM2G024119	6.02246e-06	-1.02046	down	0.0653138	0.324028	normal	0.000987516	-0.709891	normal	0.165611	0.279123	normal	0.00138356	-0.739392	normal	--
GRMZM2G024131	0.000452221	1.25212	up	8.60792e-13	-2.60557	down	5.56184e-13	-1.44537	down	1.24707e-11	-1.80918	down	0.0358334	-0.533203	normal	UDP-glucoronosyl and UDP-glucosyl transferase
GRMZM2G024145	0.331826	-0.146762	normal	0.0037105	-0.223504	normal	0.0008802	-0.379288	normal	4.81548e-49	1.25867	up	1.77304e-20	1.11825	up	Serine incorporator (Serinc)
GRMZM2G024196	0.00132774	1.687	up	--	--	--	2.738e-10	4.62948	up	2.45412e-46	-4.69205	down	1.54211e-27	-2.95599	down	OPT oligopeptide transporter protein
GRMZM2G024221	--	--	--	1.98204e-23	-5.57135	down	7.98137e-16	-3.38789	down	--	--	--	--	--	--	--
GRMZM2G024348	0.724543	-0.079693	normal	0.000924825	-0.428351	normal	0.00164203	-0.516974	normal	4.87626e-14	1.34328	up	8.01268e-10	1.27308	up	--
GRMZM2G024391	0.126175	0.775135	normal	0.857264	-0.104649	normal	0.138375	0.671651	normal	2.33066e-10	-2.24083	down	6.35823e-06	-1.4632	down	--
GRMZM2G024437	0.788385	0.0671131	normal	2.97995e-49	-1.54406	down	9.93198e-21	-1.47825	down	0.0027074	0.554267	normal	0.00513722	0.628608	normal	DHHC palmitoyltransferase
GRMZM2G024448	0.00254796	0.77713	normal	4.02295e-06	-0.867629	normal	0.704296	-0.0921262	normal	5.01633e-06	1.21344	up	2.95651e-16	2.01633	up	Eukaryotic cytochrome b561
GRMZM2G024468	0.000289022	0.832083	normal	6.10649e-19	-1.47658	down	0.000753273	-0.64729	normal	0.00967333	0.797386	normal	9.89196e-09	1.64258	up	Myb-like DNA-binding domain
GRMZM2G024530	0.00139347	-0.499896	normal	0.0157401	-0.267318	normal	3.10958e-08	-0.775746	normal	1.53418e-22	1.23008	up	5.84101e-06	0.737301	normal	Helix-loop-helix DNA-binding domain
GRMZM2G024561	--	--	--	--	--	--	--	--	--	0.0015542	-1.74502	down	0.0404061	-1.15574	normal	X8 domain
GRMZM2G024563	0.235488	0.322721	normal	0.00281317	-0.463055	normal	0.58417	-0.144181	normal	0.000381201	0.768631	normal	3.90452e-05	1.09969	up	CpeT/CpcT family (DUF1001)
GRMZM2G024624	0.889005	-0.0859441	normal	--	--	--	1.45672e-05	2.50816	up	--	--	--	7.01859e-06	3.04581	up	--
GRMZM2G024668	4.09743e-09	0.798512	normal	2.66078e-33	1.01193	up	7.3303e-69	1.80255	up	1.56779e-59	1.3845	up	9.31579e-92	2.19423	up	Hsp90 protein
GRMZM2G024680	0.00452152	0.981554	normal	3.22351e-07	-2.20596	down	7.59596e-25	-1.38355	down	1.81071e-08	-2.51481	down	2.3212e-28	-1.69381	down	tify domain
GRMZM2G024686	0.000114645	0.986918	normal	6.0295e-12	-1.44375	down	0.0175614	-0.464015	normal	0.000573238	-0.886578	normal	0.672891	0.109791	normal	Amino acid kinase family
GRMZM2G024690	0.897781	0.0246426	normal	0.6061	-0.0599786	normal	0.754157	-0.0442244	normal	1.12214e-16	1.04858	up	2.07547e-13	1.08185	up	Transmembrane Fragile-X-F protein
GRMZM2G024693	3.34658e-10	0.817575	normal	0.420965	0.108168	normal	1.13043e-16	0.918584	normal	0.000991368	0.435961	normal	5.91449e-27	1.26541	up	Ras family
GRMZM2G024705	3.28551e-15	5.40655	up	1.32899e-11	-4.70392	down	0.199709	0.527772	normal	--	--	--	3.16512e-13	5.86025	up	SPX domain
GRMZM2G024718	0.00510009	0.503804	normal	0.401771	0.140836	normal	9.15418e-06	0.638117	normal	6.01498e-97	-2.23993	down	1.15488e-54	-1.72566	down	Hsp70 protein
GRMZM2G024733	0.236116	-0.28378	normal	8.4396e-26	1.4027	up	1.26417e-06	1.0957	up	1.84343e-14	1.06445	up	0.000774788	0.781333	normal	PQ loop repeat
GRMZM2G024739	2.53974e-08	-0.957399	normal	0.791703	0.0458952	normal	5.68047e-09	-0.92293	normal	0.551982	-0.111885	normal	2.99286e-10	-1.06496	down	FAD binding domain of DNA photolyase
GRMZM2G024799	0.109246	0.702449	normal	0.480488	0.300181	normal	0.00037084	1.02493	up	6.61049e-07	2.40566	up	5.15218e-16	3.25361	up	IQ calmodulin-binding motif
GRMZM2G024806	0.0234877	-0.566012	normal	0.229382	0.305763	normal	0.338449	-0.268104	normal	0.000789821	-0.753771	normal	1.45552e-08	-1.31686	down	--
GRMZM2G024827	--	--	--	7.832e-12	-4.7424	down	0.121302	-1.10731	normal	--	--	--	--	--	--	Potato inhibitor I family
GRMZM2G024834	0.135001	-1.32656	normal	0.00313754	1.01123	up	0.217503	-1.09037	normal	0.0210774	1.09018	normal	--	--	--	Protein kinase domain
GRMZM2G024838	0.314081	0.420624	normal	0.00497893	1.1491	up	1.30534e-05	1.58298	up	0.0275224	1.00519	normal	0.000216784	1.46869	up	Ribosomal protein L10
GRMZM2G024858	0.0162309	0.355457	normal	1.32072e-08	0.768729	normal	2.02212e-16	1.11582	up	0.786995	-0.0494616	normal	0.0541737	0.314619	normal	--
GRMZM2G024865	2.54329e-05	1.00259	up	0.000665086	-0.852837	normal	0.644957	0.136851	normal	4.702e-24	-1.86471	down	7.00563e-06	-0.850137	normal	Signal peptidase, peptidase S26
GRMZM2G024958	0.0288242	1.68003	normal	--	--	--	4.97771e-09	4.37529	up	--	--	--	0.159372	1.28165	normal	--
GRMZM2G024993	9.18044e-49	1.94771	up	0	-3.24668	down	1.9513e-36	-1.2963	down	6.55587e-53	-1.14549	down	1.84045e-13	0.819165	normal	Starch synthase catalytic domain
GRMZM2G024996	0.0489794	0.640644	normal	0.497093	0.204507	normal	5.46903e-07	0.855142	normal	8.72021e-06	1.29053	up	3.9369e-27	1.98183	up	--
GRMZM2G025042	0.101544	-0.382263	normal	0.0576171	-0.352912	normal	0.000537073	-0.742409	normal	8.56039e-07	1.15911	up	0.00611886	0.788658	normal	Protein of unknown function (DUF493)
GRMZM2G025132	0.00532133	0.975672	normal	0.217076	-0.461388	normal	0.209178	0.498856	normal	0.313136	0.483734	normal	0.000259526	1.48061	up	--
GRMZM2G025154	1.67049e-06	-0.808606	normal	4.54292e-26	1.6029	up	3.86391e-05	0.781771	normal	0.0129076	0.406069	normal	0.0495209	-0.395316	normal	Serine carboxypeptidase
GRMZM2G025164	1.43507e-09	1.21788	up	0.0545713	-0.571382	normal	0.0292946	0.620639	normal	0.206268	-0.40001	normal	0.0011247	0.819806	normal	Plant protein of unknown function (DUF868)
GRMZM2G025173	--	--	--	6.00921e-07	-2.45954	down	2.0812e-06	-2.66436	down	--	--	--	--	--	--	--
GRMZM2G025175	2.46475e-08	2.12763	up	--	--	--	1.93652e-05	1.76845	up	--	--	--	1.6979e-08	2.7298	up	Pollen protein Ole e 1 like
GRMZM2G025182	0.0238178	1.38925	normal	9.22419e-16	-3.07786	down	6.37299e-07	-1.62179	down	--	--	--	0.545579	0.352275	normal	Pectinesterase
GRMZM2G025190	0.00351622	-1.27189	down	4.78002e-15	3.43751	up	1.69962e-06	2.20276	up	0.497154	-0.278714	normal	1.53148e-11	-1.6264	down	Glutathione S-transferase, N-terminal domain
GRMZM2G025227	0.720896	0.138879	normal	0.193367	-0.368866	normal	0.3213	-0.240822	normal	0.00481247	0.930054	normal	7.48162e-05	1.09573	up	Domain of unknown function (DUF543)
GRMZM2G025231	0.178177	0.281574	normal	5.23529e-89	-1.09781	down	2.17901e-06	-0.81381	normal	0.206471	-0.0954808	normal	0.322886	0.196643	normal	Cellulose synthase
GRMZM2G025255	0.000753187	-0.811106	normal	0.000233536	0.7495	normal	0.785071	-0.0734645	normal	0.000102905	-0.700111	normal	7.04038e-16	-1.51241	down	Zinc finger, C3HC4 type (RING finger)
GRMZM2G025302	0.2303	-0.776105	normal	4.51569e-39	-1.85704	down	0.00450268	-2.08875	down	0.340968	0.809231	normal	0.902597	0.146307	normal	Glycosyltransferase family 43
GRMZM2G025340	6.97344e-11	-0.773174	normal	6.24584e-07	0.541324	normal	0.103913	-0.24084	normal	1.60863e-20	1.22528	up	0.00967837	0.460281	normal	RecF/RecN/SMC N terminal domain
GRMZM2G025370	0.089572	0.936211	normal	--	--	--	2.02858e-10	4.48466	up	--	--	--	0.79506	0.160929	normal	No apical meristem-associated C-terminal domain
GRMZM2G025387	0.00017748	0.766391	normal	0.0657962	0.386792	normal	3.86785e-10	1.14767	up	2.85389e-05	-0.776521	normal	0.998418	0.000514777	normal	Protein kinase domain
GRMZM2G025414	0.000823584	1.57992	up	--	--	--	0.0018957	1.50477	up	0.000503741	-1.67979	down	0.856533	-0.102648	normal	Ubiquitin family
GRMZM2G025459	0.00237745	-1.72942	down	0.515309	0.324426	normal	--	--	--	1.19915e-30	-2.86372	down	1.87607e-37	-4.71256	down	Glycogen recognition site of AMP-activated protein kinase
GRMZM2G025477	--	--	--	5.07227e-05	-2.14674	down	0.0180353	-1.05595	normal	--	--	--	--	--	--	--
GRMZM2G025528	0.189418	-0.446434	normal	0.334959	0.252329	normal	0.528227	-0.20602	normal	0.000236337	1.16799	up	0.0664597	0.731574	normal	Ureide permease
GRMZM2G025531	0.00923713	-0.37939	normal	3.13681e-15	1.3528	up	7.39191e-06	0.960799	normal	0.0520343	0.265757	normal	0.545936	-0.105887	normal	Creatinase/Prolidase N-terminal domain
GRMZM2G025536	4.69439e-08	-2.02612	down	0.180438	0.398612	normal	2.1955e-05	-1.64235	down	0.0012238	1.12194	up	0.0790468	-0.904901	normal	non-haem dioxygenase in morphine synthesis N-terminal
GRMZM2G025579	0.142028	-0.650619	normal	1.85162e-05	1.41335	up	0.133752	0.72189	normal	0.517769	-0.257658	normal	0.0533137	-0.904136	normal	Histidine kinase-, DNA gyrase B-, and HSP90-like ATPase
GRMZM2G025611	0.854703	-0.104294	normal	0.0821825	0.790968	normal	0.124039	0.689102	normal	0.0147685	-1.00912	normal	0.00691727	-1.12702	down	Sodium/hydrogen exchanger family
GRMZM2G025646	0.0602874	0.538225	normal	0.0630618	-0.529924	normal	0.987799	-0.00368176	normal	0.0963045	0.53607	normal	1.29973e-07	1.10096	up	Early Flowering 4 domain
GRMZM2G025720	2.11859e-33	7.27156	up	--	--	--	3.77968e-30	4.82925	up	--	--	--	2.07299e-23	3.35828	up	Protein of unknown function (DUF674)
GRMZM2G025763	1.90172e-23	2.12237	up	1.79719e-46	-1.71402	down	0.0804991	0.421129	normal	0	-4.62195	down	1.22128e-35	-2.43548	down	--
GRMZM2G025783	0.0150634	-0.852041	normal	0.060611	0.575798	normal	0.499537	-0.285881	normal	0.00090984	1.13332	up	0.558649	0.286418	normal	Kelch motif
GRMZM2G025812	0.0463828	0.341744	normal	0.266257	-0.108768	normal	0.167996	0.22487	normal	3.57702e-24	1.09148	up	1.52769e-19	1.4392	up	bZIP transcription factor
GRMZM2G025854	9.81852e-09	-0.91087	normal	1.76706e-40	1.22961	up	0.0686446	0.303278	normal	1.70045e-50	1.68261	up	1.52717e-05	0.774833	normal	Phosphoglucomutase/phosphomannomutase, alpha/beta/alpha domain I
GRMZM2G025855	0.00209905	-0.748625	normal	2.56423e-10	-0.795558	normal	3.61295e-15	-1.55138	down	0.00368981	0.522318	normal	0.424097	-0.225618	normal	Ribosomal protein S5, N-terminal domain
GRMZM2G025857	7.71977e-05	-1.26703	down	1.71141e-05	0.951262	normal	0.193462	-0.34897	normal	0.691297	0.107106	normal	4.82653e-07	-1.18451	down	Seed maturation protein
GRMZM2G025867	2.28113e-18	1.27014	up	1.53382e-11	-0.650703	normal	6.45814e-07	0.615036	normal	5.33468e-41	-1.35866	down	0.660117	-0.0742194	normal	2OG-Fe(II) oxygenase superfamily
GRMZM2G025959	1.0138e-16	-0.86637	normal	3.86133e-121	1.5676	up	7.17292e-12	0.689037	normal	0.00484167	-0.198449	normal	2.35537e-24	-1.05729	down	Jacalin-like lectin domain
GRMZM2G026020	1.08007e-07	1.70934	up	0.540845	0.289146	normal	7.79711e-10	1.99786	up	0.000227336	-1.2751	down	0.165048	0.445297	normal	Endonuclease/Exonuclease/phosphatase family
GRMZM2G026085	0.0268647	1.01611	normal	0.196851	-0.570489	normal	0.303273	0.443478	normal	0.000162741	-1.47209	down	0.303385	-0.440971	normal	Cgr1 family
GRMZM2G026131	0.962734	-0.0311305	normal	--	--	--	0.00029569	1.76741	up	--	--	--	1.73294e-11	5.54457	up	--
GRMZM2G026143	1.59632e-06	0.896892	normal	1.06958e-41	2.04742	up	6.58561e-53	2.92269	up	4.91237e-27	2.42802	up	3.3453e-36	3.32654	up	--
GRMZM2G026147	0.060243	0.999563	normal	0.000431534	-1.51994	down	0.0811297	-0.537955	normal	1.24659e-19	-3.12252	down	9.07433e-19	-2.13396	down	Expansin C-terminal domain
GRMZM2G026157	0.00172308	1.75009	up	--	--	--	0.0252049	1.86682	normal	--	--	--	8.8325e-11	5.42202	up	CCAAT-binding transcription factor (CBF-B/NF-YA) subunit B
GRMZM2G026189	--	--	--	--	--	--	--	--	--	3.51542e-06	-2.90516	down	1.64674e-07	-4.06656	down	NB-ARC domain
GRMZM2G026216	0.00227884	0.644493	normal	0.00015885	0.574995	normal	5.97166e-13	1.21163	up	0.0942061	-0.268747	normal	0.0318879	0.388244	normal	Ribosomal protein L21e
GRMZM2G026223	0.0375882	0.371038	normal	1.20669e-30	-1.36701	down	7.73412e-17	-1.00425	down	0.291907	-0.205062	normal	0.372395	0.17479	normal	SRF-type transcription factor (DNA-binding and dimerisation domain)
GRMZM2G026229	0.169688	0.726316	normal	--	--	--	0.00882344	1.58384	up	--	--	--	0.781199	0.192766	normal	F-box domain
GRMZM2G026322	2.43694e-08	2.2216	up	--	--	--	1.84572e-13	2.54008	up	0.918998	-0.0793979	normal	4.59138e-08	2.18805	up	Cytochrome P450
GRMZM2G026391	1.111e-07	-1.00807	down	7.69075e-33	1.67137	up	0.00422602	0.641531	normal	2.43496e-22	1.36363	up	0.129058	0.356069	normal	OPT oligopeptide transporter protein
GRMZM2G026452	0.158017	0.567429	normal	2.08311e-05	-1.12447	down	0.129337	-0.546582	normal	0.817302	0.110689	normal	0.116762	0.691092	normal	--
GRMZM2G026470	0.371464	0.179546	normal	6.2836e-12	-0.916836	normal	1.34564e-08	-0.746965	normal	3.17961e-54	-1.83426	down	2.75005e-44	-1.64916	down	Inorganic pyrophosphatase
GRMZM2G026523	4.99217e-20	-1.27341	down	6.15272e-34	1.28983	up	0.985031	0.00363098	normal	6.72353e-07	0.54073	normal	1.4415e-06	-0.727662	normal	POT family
GRMZM2G026558	0.714081	-0.181909	normal	0.00221614	1.40659	up	0.00840981	1.23477	up	0.00722781	1.49323	up	0.0239266	1.36494	normal	--
GRMZM2G026580	0.0707888	0.632351	normal	0.0347733	0.741371	normal	6.0893e-05	1.36467	up	0.615933	-0.182973	normal	0.143088	0.46595	normal	DNA polymerase III, delta subunit
GRMZM2G026654	2.7177e-09	1.57754	up	0.22605	-0.37705	normal	2.81075e-06	1.19299	up	1.05386e-07	-1.46685	down	0.727445	0.1177	normal	Peptidase M50B-like
GRMZM2G026672	1.29874e-17	-5.71745	down	0.955985	-0.0221618	normal	7.95516e-18	-5.80046	down	2.04518e-13	-1.81726	down	2.13855e-30	-7.97407	down	--
GRMZM2G026676	0.0224754	0.731765	normal	1.11326e-05	-1.03104	down	0.205891	-0.30023	normal	2.5122e-27	-2.20371	down	6.57518e-13	-1.4565	down	--
GRMZM2G026742	5.37253e-05	-1.05606	down	0.0554376	0.393089	normal	0.00691974	-0.677504	normal	0.421776	0.195902	normal	0.000906573	-0.860312	normal	HSF-type DNA-binding
GRMZM2G026758	0.0284021	0.494153	normal	5.52008e-16	-1.19237	down	9.42651e-05	-0.702382	normal	0.523203	0.159341	normal	0.00319768	0.663835	normal	short chain dehydrogenase
GRMZM2G026767	3.03841e-14	-1.25302	down	0.0250527	0.351594	normal	4.66357e-07	-0.909627	normal	0.832152	0.0405747	normal	7.1256e-13	-1.20841	down	Protein tyrosine and serine/threonine kinase
GRMZM2G026780	0.0021032	1.20987	up	6.28528e-07	-2.12064	down	4.42269e-06	-1.01795	down	0.270485	0.476592	normal	1.10208e-07	1.73939	up	--
GRMZM2G026802	0.00329492	0.711779	normal	0.487056	-0.186461	normal	0.0143504	0.518704	normal	0.127477	0.491441	normal	1.75149e-06	1.22124	up	Nse4 C-terminal
GRMZM2G026855	0.924033	-0.024663	normal	6.7008e-17	1.29989	up	3.48214e-10	1.26028	up	0.00119242	0.646149	normal	0.0121627	0.629245	normal	Glycosyl hydrolases family 28
GRMZM2G026868	2.24874e-05	1.02234	up	0.11082	-0.328005	normal	0.0023659	0.690348	normal	0.000425429	-0.702692	normal	0.17165	0.336378	normal	--
GRMZM2G026881	0.609938	-0.282286	normal	0.757157	0.11953	normal	0.694555	-0.182632	normal	0.00769148	-0.836609	normal	0.00296629	-1.1242	down	Polysaccharide biosynthesis
GRMZM2G026884	0.139565	0.861787	normal	0.0140678	-1.63953	normal	2.90552e-06	-1.10161	down	0.00362185	2.32877	up	1.05308e-16	4.11924	up	SPFH domain / Band 7 family
GRMZM2G026889	3.2392e-07	-2.21506	down	7.40178e-13	2.27189	up	0.975674	-0.0211606	normal	0.00211321	-0.75122	normal	2.67278e-14	-3.01622	down	--
GRMZM2G026892	4.30797e-12	1.01093	up	1.71077e-58	-1.72411	down	5.10112e-11	-0.719437	normal	5.34319e-82	-2.16819	down	9.95634e-21	-1.14733	down	--
GRMZM2G026910	0.9502	-0.0239612	normal	2.23538e-09	1.80667	up	1.83077e-09	1.78471	up	0.0178497	0.737903	normal	0.0154129	0.730471	normal	Plant protein 1589 of unknown function (A_thal_3526)
GRMZM2G026922	0.256259	0.343679	normal	0.000609688	0.843847	normal	1.98505e-05	1.17452	up	0.21504	0.355162	normal	0.016758	0.710006	normal	--
GRMZM2G026927	0.246926	-0.633428	normal	0.0259174	-0.806734	normal	7.15456e-05	-1.47695	down	0.051326	-0.75773	normal	0.000249885	-1.4309	down	Transcriptional repressor, ovate
GRMZM2G026930	0.0694558	0.695633	normal	3.03567e-05	1.82274	up	1.60527e-09	2.52047	up	1.53689e-15	5.53077	up	1.00921e-18	6.71659	up	NAD dependent epimerase/dehydratase family
GRMZM2G026939	0.0283435	-0.400969	normal	5.19625e-40	2.28772	up	9.68299e-59	1.89335	up	1.47103e-14	1.27402	up	6.86504e-16	0.886509	normal	Zein seed storage protein
GRMZM2G026952	1.38518e-05	-0.767967	normal	0.0193494	-0.330381	normal	2.04836e-11	-1.10767	down	0.375446	-0.156549	normal	4.38702e-07	-0.918695	normal	Zinc-finger of C2H2 type
GRMZM2G026956	0.0298728	1.61088	normal	0.869602	0.0998381	normal	5.18475e-10	2.0994	up	0.0806672	-1.29399	normal	0.291384	0.434069	normal	Expansin C-terminal domain
GRMZM2G026969	0.000342007	-0.781454	normal	8.48695e-150	2.77527	up	6.37146e-20	1.95007	up	1.17527e-165	3.33095	up	3.4565e-29	2.52515	up	pfkB family carbohydrate kinase
GRMZM2G026980	1.7517e-13	-1.16946	down	0.935254	-0.0142188	normal	1.85033e-12	-1.1922	down	9.65196e-16	-0.948092	normal	4.92012e-56	-2.11558	down	Glycosyl hydrolases family 16
GRMZM2G027016	--	--	--	--	--	--	--	--	--	0.000143008	-3.04882	down	6.23027e-44	-5.59516	down	MatE
GRMZM2G027021	9.23096e-05	-1.34813	down	0.166362	-0.362654	normal	1.00189e-07	-1.71989	down	0.196022	-0.382063	normal	4.32199e-07	-1.73796	down	GTP-binding GTPase N-terminal
GRMZM2G027043	9.94244e-27	1.98752	up	0.591931	-0.154642	normal	1.90898e-24	1.82522	up	0.967357	0.015777	normal	2.71253e-22	2.01694	up	Cytidylyltransferase family
GRMZM2G027075	7.11003e-13	-1.3138	down	0.0245718	-0.208083	normal	3.83715e-22	-1.53379	down	1.33516e-236	3.21875	up	3.52709e-27	1.8921	up	JmjC domain, hydroxylase
GRMZM2G027173	0.115527	0.351386	normal	3.78441e-10	-0.895339	normal	0.00154592	-0.549946	normal	8.83514e-06	0.991409	normal	3.63253e-09	1.355	up	ELMO/CED-12 family
GRMZM2G027187	3.72018e-13	5.14199	up	2.02642e-22	-6.10572	down	0.0431838	-0.869401	normal	--	--	--	7.58294e-12	5.64332	up	Microtubule associated protein (MAP65/ASE1 family)
GRMZM2G027198	0.484775	-0.269417	normal	1.88854e-27	6.5671	up	3.65006e-23	6.40665	up	0.00172861	-0.790015	normal	7.22592e-05	-1.06082	down	Plastocyanin-like domain
GRMZM2G027241	9.08992e-08	1.27249	up	0.000381158	-0.705917	normal	0.00294511	0.567111	normal	0.182449	0.363916	normal	9.27081e-16	1.66122	up	TB2/DP1, HVA22 family
GRMZM2G027309	0.0130817	-1.10556	normal	0.000146167	1.4926	up	0.568837	0.350778	normal	0.178654	0.627252	normal	0.468446	-0.464905	normal	No apical meristem (NAM) protein
GRMZM2G027331	0.0314042	0.54075	normal	4.70191e-28	-1.60239	down	4.91533e-10	-1.06181	down	0.00099894	-0.630942	normal	0.75667	-0.0769788	normal	--
GRMZM2G027385	0.101969	0.48117	normal	0.0475933	-0.505083	normal	0.909584	-0.0320249	normal	8.24222e-07	-1.1042	down	0.00239488	-0.617407	normal	Glycosyl hydrolases family 35
GRMZM2G027437	0.82655	0.0977825	normal	0.0484349	0.880629	normal	0.0301755	0.974731	normal	0.0103395	1.4383	normal	0.00705645	1.5836	up	PRC-barrel domain
GRMZM2G027472	5.15744e-11	-2.9496	down	0.0635664	0.719353	normal	6.96914e-05	-2.16954	down	0.726155	0.142858	normal	3.08192e-09	-2.86561	down	Basal layer antifungal peptide (BAP)
GRMZM2G027490	0.878206	-0.103108	normal	0.0305962	1.2241	normal	--	--	--	1.56474e-05	-1.48385	down	0.000475623	-1.57094	down	--
GRMZM2G027495	3.21162e-26	1.48659	up	0.000112763	-0.42851	normal	1.18104e-17	1.05249	up	0.00156228	-0.364625	normal	6.80584e-21	1.13584	up	Ring finger domain
GRMZM2G027571	0.691432	0.158999	normal	0.274502	-0.294626	normal	0.678863	-0.140668	normal	1.04931e-07	-1.20149	down	0.000178737	-1.03013	down	LSM domain
GRMZM2G027627	0.728192	0.0799897	normal	0.939392	-0.00985506	normal	0.75175	0.0608581	normal	4.05045e-54	-1.43478	down	1.77923e-19	-1.34263	down	Dehydrogenase E1 component
GRMZM2G027638	2.43315e-05	2.81026	up	1.2289e-11	-3.50837	down	0.174556	-0.491638	normal	--	--	--	0.0148453	1.89779	normal	--
GRMZM2G027663	5.3126e-25	-2.37806	down	3.6726e-09	0.704606	normal	5.73494e-15	-1.69894	down	3.70632e-14	0.934764	normal	1.0833e-10	-1.46125	down	Radical SAM ThiC family
GRMZM2G027665	0.00789539	1.2889	up	--	--	--	0.00167977	1.59076	up	0.00223235	-1.40708	down	0.840055	-0.103529	normal	VAD1 Analog of StAR-related lipid transfer domain
GRMZM2G027726	1.54674e-14	-2.96592	down	6.98635e-09	1.74609	up	0.0231371	-1.21388	normal	2.17547e-16	-1.57863	down	1.6666e-52	-4.63058	down	Inhibitor of apoptosis-promoting Bax1
GRMZM2G027728	0.407794	0.200073	normal	1.65167e-12	1.84246	up	6.77108e-15	2.0373	up	5.22622e-10	-1.08139	down	1.35517e-06	-0.874382	normal	Ribosomal protein L7Ae/L30e/S12e/Gadd45 family
GRMZM2G027794	0.155886	-0.610855	normal	0.266562	-0.3796	normal	0.0112999	-0.993666	normal	0.0291913	-0.746906	normal	0.000561369	-1.35966	down	Glycosyltransferase like family 2
GRMZM2G027851	1.12214e-06	1.09656	up	1.18129e-17	-1.71892	down	0.000808535	-0.632858	normal	6.17723e-24	-2.02206	down	4.08609e-07	-0.920342	normal	Sodium/hydrogen exchanger family
GRMZM2G027857	3.39019e-15	-1.1313	down	3.83685e-07	-0.517914	normal	1.46919e-45	-1.66097	down	0.988278	0.00241891	normal	1.15399e-14	-1.12337	down	Apg6 BARA domain
GRMZM2G027958	9.18018e-05	1.70757	up	0.416115	-0.481566	normal	0.0130018	1.17685	normal	--	--	--	6.8263e-05	1.74941	up	Protein kinase domain
GRMZM2G027960	6.13867e-09	-1.4307	down	0.0129162	0.612134	normal	0.00595126	-0.820009	normal	0.842488	0.0662843	normal	9.06349e-06	-1.35451	down	--
GRMZM2G027962	0.32547	0.282282	normal	0.00507235	0.921577	normal	0.000113035	1.19886	up	7.44509e-32	-2.18657	down	1.07059e-24	-1.90183	down	--
GRMZM2G027972	0.0166343	-0.635626	normal	6.07663e-05	1.20981	up	0.131915	0.571805	normal	9.80652e-05	-0.839938	normal	6.59354e-10	-1.47357	down	WRKY DNA -binding domain
GRMZM2G027976	1.637e-06	2.68755	up	--	--	--	0.0621544	1.04375	normal	--	--	--	0.00111117	2.66792	up	bZIP transcription factor
GRMZM2G028007	1.84486e-05	1.4638	up	0.0370922	-0.763821	normal	0.0497477	0.686611	normal	0.938868	0.0467273	normal	0.000111136	1.52523	up	--
GRMZM2G028014	0.0255716	-0.888722	normal	0.71402	0.152084	normal	0.0865507	-0.740632	normal	0.000174813	1.6813	up	0.144114	0.822852	normal	F-box-like
GRMZM2G028108	7.29676e-06	1.66475	up	4.23763e-19	-2.4884	down	0.00273992	-0.805878	normal	0.135753	-0.73913	normal	0.0173268	0.929571	normal	PPR repeat family
GRMZM2G028110	1.15945e-05	-1.04275	down	5.26677e-12	1.24501	up	0.249943	0.186224	normal	4.01767e-05	0.814694	normal	0.271892	-0.229722	normal	Glyoxalase/Bleomycin resistance protein/Dioxygenase superfamily
GRMZM2G028129	1.41288e-16	-1.80811	down	1.14504e-13	1.38723	up	0.0917459	-0.43655	normal	0.05436	0.36447	normal	3.81192e-12	-1.45043	down	Domain associated at C-terminal with AAA
GRMZM2G028306	9.0837e-133	-6.43503	down	2.53657e-55	2.66788	up	5.60966e-22	-3.70347	down	2.83567e-181	6.63821	up	--	--	--	Terpene synthase family, metal binding domain
GRMZM2G028307	1.8905e-16	-1.14347	down	1.23361e-08	-0.492747	normal	2.86105e-35	-1.64449	down	7.19792e-06	-0.38377	normal	1.02384e-31	-1.52115	down	Alpha galactosidase A
GRMZM2G028335	0.129733	-0.360732	normal	1.04712e-05	0.893679	normal	0.0330039	0.522822	normal	5.62785e-07	1.51653	up	0.00129882	1.17208	up	DNA replication factor CDT1 like
GRMZM2G028346	1.36101e-09	1.17966	up	0.0472801	-0.33459	normal	5.65449e-06	0.839684	normal	0.0710718	-0.341242	normal	1.12148e-05	0.852376	normal	Proteasome subunit
GRMZM2G028366	0.000137128	0.803413	normal	1.31886e-09	-1.16652	down	0.0526207	-0.373535	normal	7.98933e-34	-1.98033	down	1.95978e-15	-1.1699	down	DEAD/DEAH box helicase
GRMZM2G028379	3.16894e-14	1.01115	up	6.71484e-42	-1.12666	down	0.344742	-0.120871	normal	5.76043e-08	-0.580156	normal	0.00115915	0.441833	normal	CHCH domain
GRMZM2G028386	0.268947	-0.543239	normal	0.632681	0.162367	normal	0.420284	-0.395057	normal	3.11854e-13	-1.61188	down	5.21534e-09	-2.1383	down	AP2 domain
GRMZM2G028393	0.0146576	0.605938	normal	1.23548e-05	-1.03333	down	0.00664146	-0.444894	normal	2.49542e-08	-1.36114	down	2.5523e-06	-0.761653	normal	Potato inhibitor I family
GRMZM2G028438	0.0181931	1.3329	normal	--	--	--	0.00991701	1.20715	up	--	--	--	0.00490138	2.22747	up	GRAS domain family
GRMZM2G028492	0.000217006	-0.967679	normal	0.66026	-0.108087	normal	1.86963e-08	-1.09528	down	0.201956	-0.311786	normal	4.18958e-10	-1.28548	down	Zinc finger C-x8-C-x5-C-x3-H type (and similar)
GRMZM2G028500	0.0307629	0.41555	normal	2.89923e-18	-0.967909	normal	0.000187677	-0.557069	normal	1.89002e-15	1.40832	up	9.6743e-21	1.83474	up	--
GRMZM2G028604	0.0024411	-1.48685	down	2.991e-07	1.93771	up	--	--	--	6.32975e-06	-1.34153	down	4.96334e-11	-2.85328	down	Protein tyrosine and serine/threonine kinase
GRMZM2G028608	0.0584844	-1.33859	normal	0.000148801	2.4181	up	--	--	--	1.01767e-08	-1.82924	down	6.07317e-09	-3.23387	down	GRAS domain family
GRMZM2G028640	1.60909e-51	4.37862	up	2.17831e-08	-1.9666	down	1.77037e-22	2.39333	up	0.488597	0.501212	normal	3.12159e-41	4.92915	up	Protein of unknown function (DUF861)
GRMZM2G028665	0.00263865	1.27176	up	0.167681	-0.681773	normal	0.197412	0.564005	normal	0.112053	-0.846472	normal	0.398347	0.413452	normal	Domain of unknown function (DUF151)
GRMZM2G028677	0.0906615	-0.693451	normal	0.0194695	-0.708679	normal	1.07319e-06	-1.42913	down	1.63764e-58	-3.13985	down	1.61212e-83	-3.86893	down	Cytochrome P450
GRMZM2G028718	1.91384e-14	-1.22052	down	1.14404e-06	0.82726	normal	0.0832383	-0.39897	normal	0.000389163	0.547335	normal	0.000352508	-0.666583	normal	PPR repeat family
GRMZM2G028726	5.08945e-05	1.6443	up	--	--	--	0.00104778	1.56075	up	0.254405	-0.64692	normal	0.0155412	1.00101	normal	GGL domain
GRMZM2G028733	0.000399511	-0.697838	normal	1.78475e-56	2.51746	up	3.37559e-16	1.79513	up	4.87045e-24	1.56615	up	7.83326e-05	0.870474	normal	Ubiquitin carboxyl-terminal hydrolase
GRMZM2G028813	0.00302516	-0.381423	normal	0.639436	-0.0462122	normal	3.57531e-05	-0.437279	normal	5.07939e-44	1.62139	up	1.76369e-17	1.24756	up	IQ calmodulin-binding motif
GRMZM2G028821	2.77547e-41	-4.50896	down	5.74008e-66	1.84322	up	5.18841e-13	-2.72673	down	2.73823e-11	4.40739	up	0.33742	0.78262	normal	Glutathione S-transferase, N-terminal domain
GRMZM2G028852	0.0397734	-0.724829	normal	0.00025243	1.32871	up	0.172375	0.602558	normal	0.577043	0.23133	normal	0.247158	-0.487224	normal	PPR repeat
GRMZM2G028883	0.0733959	0.517941	normal	0.00548593	0.532739	normal	0.000137812	1.03357	up	9.70925e-06	-0.689769	normal	0.607101	-0.152859	normal	Ribosomal protein L14
GRMZM2G028885	0.530909	-0.181004	normal	1.59957e-35	7.19609	up	9.05507e-31	7.10457	up	7.75379e-22	3.80067	up	4.35477e-14	3.62736	up	--
GRMZM2G028887	1.25731e-13	1.09372	up	1.09818e-82	-1.8095	down	3.04843e-09	-0.719027	normal	1.47831e-58	-1.77203	down	1.77283e-06	-0.665714	normal	--
GRMZM2G028889	0.0139219	-1.10407	normal	0.214301	-0.452782	normal	3.34373e-06	-1.5978	down	1.46402e-05	2.48585	up	0.0556542	1.44406	normal	--
GRMZM2G028902	1.09574e-13	2.7157	up	6.10387e-10	-2.36868	down	0.349467	0.319579	normal	--	--	--	4.46737e-05	2.16552	up	Proteasome assembly chaperone 3
GRMZM2G028905	0.0254341	-0.460731	normal	6.63051e-11	0.973898	normal	0.0172512	0.498918	normal	1.20724e-12	1.22322	up	0.000768988	0.767594	normal	Nucleotide-diphospho-sugar transferase
GRMZM2G028921	0.491804	-0.302086	normal	7.0042e-07	-0.840535	normal	0.00128727	-1.12605	down	0.306441	-0.231651	normal	0.187574	-0.525735	normal	RNA recognition motif. (a.k.a. RRM, RBD, or RNP domain)
GRMZM2G028955	0.973136	0.0207479	normal	6.83967e-07	2.02094	up	3.01517e-08	2.07285	up	0.449111	0.343406	normal	0.347891	0.378259	normal	C-terminus of histone H2A
GRMZM2G029027	2.05157e-05	1.07198	up	2.7831e-53	-2.30035	down	5.37315e-13	-1.21989	down	2.49725e-28	-1.86701	down	4.44305e-05	-0.773577	normal	tRNA synthetases class I (R)
GRMZM2G029039	7.65473e-09	1.53143	up	0.014696	1.1453	normal	6.16795e-14	2.67769	up	6.87393e-15	5.44147	up	7.62391e-26	7.5226	up	Kelch motif
GRMZM2G029048	5.81214e-22	-1.30038	down	1.63076e-38	1.31439	up	0.996252	0.000684905	normal	5.70684e-08	0.549528	normal	5.31138e-10	-0.747486	normal	Aromatic amino acid lyase
GRMZM2G029058	0.126175	0.283281	normal	1.10017e-18	-1.12964	down	5.20475e-09	-0.853218	normal	0.00213345	-0.514943	normal	0.255544	-0.223212	normal	RNA recognition motif. (a.k.a. RRM, RBD, or RNP domain)
GRMZM2G029082	0.580904	-0.105146	normal	4.12735e-96	-1.8558	down	2.62587e-71	-1.96807	down	3.69319e-19	-1.06152	down	2.42121e-16	-1.15873	down	Filament-like plant protein, long coiled-coil
GRMZM2G029107	0.417022	0.18409	normal	0.000137573	0.483292	normal	0.000799487	0.655816	normal	2.09541e-38	-1.18416	down	6.27932e-09	-0.98538	normal	EF hand
GRMZM2G029135	0.152334	0.256674	normal	0.720569	-0.0679173	normal	0.366163	0.179602	normal	4.60889e-05	0.73425	normal	4.22463e-08	1.00177	up	Aminotransferase class I and II
GRMZM2G029141	2.20753e-20	5.44037	up	--	--	--	0.0119834	2.16324	normal	--	--	--	0.156372	1.51956	normal	Signal peptidase, peptidase S26
GRMZM2G029211	9.42439e-21	-3.24612	down	2.79205e-22	3.38062	up	--	--	--	8.48814e-07	1.66041	up	0.00750639	-1.53529	down	Leucine rich repeat
GRMZM2G029223	0.307013	-0.412195	normal	1.59175e-08	1.52911	up	0.00780719	1.06984	up	0.000315231	1.071	up	0.136936	0.652129	normal	Kinesin motor domain
GRMZM2G029242	0.0200539	-0.588162	normal	0.00536173	-0.469471	normal	1.42916e-06	-1.06418	down	0.682193	0.11307	normal	0.120475	-0.468113	normal	Protein kinase domain
GRMZM2G029243	0.00583514	-0.691456	normal	6.98859e-33	-1.96839	down	1.35837e-53	-2.67558	down	0.000879759	-0.720774	normal	1.9072e-11	-1.41489	down	Glycosyl hydrolases family 31
GRMZM2G029292	0.349909	-0.320171	normal	0.065965	1.48494	normal	0.0811297	1.51872	normal	0.0120516	2.14195	normal	5.25245e-05	2.88101	up	WRKY DNA -binding domain
GRMZM2G029314	0.2658	0.620117	normal	--	--	--	0.295546	0.646814	normal	--	--	--	0.00501592	2.23532	up	--
GRMZM2G029323	7.26133e-05	-0.604431	normal	0.603063	0.0677526	normal	1.54968e-06	-0.547886	normal	6.53966e-07	-0.572607	normal	4.48104e-21	-1.17167	down	AP2 domain
GRMZM2G029356	6.84362e-13	1.83875	up	5.29213e-21	4.14205	up	6.88844e-56	6.03472	up	0.000514141	1.69304	up	2.45258e-16	3.5554	up	--
GRMZM2G029385	1.46595e-10	-2.16142	down	1.10157e-07	1.46991	up	0.100965	-0.707838	normal	0.828762	-0.0826458	normal	5.2539e-09	-2.24613	down	--
GRMZM2G029396	0.658159	0.0680739	normal	6.24906e-42	1.62299	up	1.67026e-30	1.67786	up	1.21094e-24	1.45127	up	1.12506e-18	1.52583	up	Squalene/phytoene synthase
GRMZM2G029407	--	--	--	0.0570588	-0.882207	normal	1.29042e-10	-3.45127	down	0.896568	-0.0852234	normal	2.4074e-05	-2.69975	down	Protein kinase domain
GRMZM2G029455	6.89724e-17	5.69773	up	--	--	--	5.06697e-07	2.88619	up	--	--	--	0.0276211	1.13785	normal	Rapid ALkalinization Factor (RALF)
GRMZM2G029506	1.6531e-13	-2.23282	down	3.2136e-35	1.69462	up	0.105944	-0.593687	normal	3.77326e-41	2.36883	up	0.865245	0.0832471	normal	ABC-2 type transporter
GRMZM2G029518	1.99151e-10	-1.82247	down	0.318709	0.323638	normal	1.59997e-05	-1.48876	down	0.0997276	0.440151	normal	7.36832e-08	-1.40116	down	--
GRMZM2G029537	1.44282e-48	-6.39166	down	1.10725e-40	7.57164	up	--	--	--	1.49846e-44	7.23759	up	--	--	--	--
GRMZM2G029566	0.5511	-0.0995234	normal	1.79834e-37	-1.24773	down	2.98785e-26	-1.35357	down	0.0500092	-0.233016	normal	0.0232587	-0.324493	normal	Fumarylacetoacetate (FAA) hydrolase family
GRMZM2G029587	0.198282	-0.747709	normal	3.85773e-20	-2.82716	down	9.89022e-62	-3.72453	down	1.69545e-14	-3.68958	down	1.43576e-120	-4.86602	down	Core-2/I-Branching enzyme
GRMZM2G029641	0.000784651	1.13085	up	0.000597091	-1.09232	down	0.917345	0.0310562	normal	0.602781	0.278111	normal	8.06617e-05	1.43621	up	Serine carboxypeptidase
GRMZM2G029685	6.14189e-06	1.03031	up	0.00129355	0.951622	normal	2.71864e-15	1.9784	up	0.00949198	-0.772005	normal	0.440727	0.2568	normal	Ribosomal protein S24e
GRMZM2G029692	0.686468	0.135476	normal	0.749092	-0.0960225	normal	0.924578	0.0300832	normal	4.75485e-06	-1.0645	down	8.15121e-05	-0.92597	normal	Protein tyrosine and serine/threonine kinase
GRMZM2G029716	--	--	--	--	--	--	--	--	--	3.22204e-16	-5.62903	down	1.13962e-14	-6.09929	down	LEM3 (ligand-effect modulator 3) family / CDC50 family
GRMZM2G029720	0.203047	0.478176	normal	0.0338062	0.812348	normal	0.000914923	1.27631	up	0.0278473	-0.695321	normal	0.584927	-0.205459	normal	--
GRMZM2G029756	0.278886	0.709436	normal	--	--	--	2.73052e-08	3.14534	up	--	--	--	0.0336726	1.4312	normal	Lipase (class 3)
GRMZM2G029824	0.496938	-0.161477	normal	0.724152	-0.0894424	normal	0.317556	-0.259902	normal	9.22492e-13	-1.17032	down	3.28615e-15	-1.32747	down	Peroxisomal biogenesis factor 11 (PEX11)
GRMZM2G029833	--	--	--	1.07325e-27	-6.58782	down	3.83938e-26	-6.68309	down	4.09902e-12	-5.01549	down	2.13371e-11	-5.52334	down	RNA polymerase Rpc34 subunit
GRMZM2G029850	0.00371336	-1.08066	down	0.672682	0.15757	normal	0.00903432	-0.937095	normal	0.0702517	0.799089	normal	0.648696	-0.258422	normal	Myb-like DNA-binding domain
GRMZM2G029868	1.01892e-08	-1.94866	down	1.54068e-05	-0.83991	normal	3.56502e-20	-2.79652	down	5.08905e-85	-2.56193	down	3.40106e-75	-4.5317	down	--
GRMZM2G029879	0.00524946	-1.22408	down	0.0147697	-0.818296	normal	5.00169e-11	-2.09448	down	9.41102e-11	-1.84002	down	5.79434e-30	-3.13922	down	Cyclin
GRMZM2G029912	0.0559234	-0.299148	normal	1.30986e-12	-0.734315	normal	3.11924e-20	-1.04354	down	2.7795e-22	-0.95969	normal	1.00007e-32	-1.25335	down	WAX2 C-terminal domain
GRMZM2G029979	3.25451e-14	-2.91644	down	9.76749e-05	1.18813	up	0.000474905	-1.71113	down	5.65985e-20	3.15473	up	--	--	--	Seed dormancy control
GRMZM2G030013	7.52784e-20	-5.9983	down	0.0932536	-0.539532	normal	3.94004e-25	-6.61089	down	0.0765322	-0.596739	normal	4.004e-22	-7.11061	down	KH domain
GRMZM2G030106	5.1094e-27	-2.86294	down	0.0113741	-0.532124	normal	4.72872e-35	-3.39156	down	4.19419e-35	7.46226	up	5.47368e-09	5.01372	up	Leucine rich repeat
GRMZM2G030122	0.0198351	-0.502032	normal	0.000549579	0.562803	normal	0.847812	0.0492338	normal	1.85894e-12	1.28839	up	0.000877399	0.791685	normal	Protein of unknown function (DUF1624)
GRMZM2G030128	0.445374	-0.1872	normal	1.87888e-10	1.03806	up	0.000230741	0.834112	normal	0.746762	-0.0603134	normal	0.296164	-0.239623	normal	AAA domain
GRMZM2G030167	2.80433e-12	0.890447	normal	3.95876e-40	-1.01694	down	0.274083	-0.131991	normal	0.000254325	-0.330476	normal	9.02796e-07	0.571386	normal	ATP synthase (E/31 kDa) subunit
GRMZM2G030203	0.234638	-0.606183	normal	6.60956e-06	2.22563	up	0.00917834	1.57419	up	0.00622335	1.23902	up	0.263671	0.636981	normal	Ribosomal protein L10
GRMZM2G030241	0.111015	0.585837	normal	0.00709338	1.20742	up	2.29936e-06	1.81049	up	0.819699	-0.12561	normal	0.299305	0.463938	normal	Glutathione-dependent formaldehyde-activating enzyme
GRMZM2G030275	1.69546e-05	0.551984	normal	2.81215e-60	-1.09353	down	9.62381e-07	-0.547158	normal	0.745449	-0.038654	normal	6.89282e-05	0.522499	normal	Vitamin B6 photo-protection and homoeostasis
GRMZM2G030284	0.618561	0.18317	normal	0.973181	-0.0113083	normal	0.618358	0.164037	normal	3.96398e-07	2.29011	up	1.22912e-07	2.51942	up	Microtubule associated protein (MAP65/ASE1 family)
GRMZM2G030299	0.21121	-0.321998	normal	0.793905	0.0501762	normal	0.237537	-0.282466	normal	1.067e-09	-0.879441	normal	2.80695e-09	-1.19325	down	Fructosamine kinase
GRMZM2G030402	0.00452082	1.40497	up	0.000195021	-1.42407	down	0.971229	0.0177512	normal	0.12462	-0.759147	normal	0.135098	0.693528	normal	--
GRMZM2G030403	6.4639e-07	-2.19333	down	0.147118	0.574009	normal	0.00123587	-1.61097	down	0.0453818	-0.715505	normal	2.08965e-12	-2.96246	down	Myb-like DNA-binding domain
GRMZM2G030426	0.00146793	-1.14021	down	0.000312492	0.94935	normal	0.633076	-0.215497	normal	0.205838	-0.444455	normal	0.000189399	-1.57039	down	PPR repeat family
GRMZM2G030436	0.00143081	-0.98931	normal	5.37899e-10	2.3218	up	1.03527e-11	1.41941	up	0.000975577	1.26057	up	0.177816	0.309262	normal	Transferase family
GRMZM2G030465	--	--	--	0.301006	0.566577	normal	--	--	--	0.0541346	-0.904703	normal	1.25281e-07	-2.64814	down	AUX/IAA family
GRMZM2G030494	0.0221979	-1.06708	normal	0.00232486	-1.03616	down	8.46612e-08	-2.11448	down	0.0578915	-0.765099	normal	2.6672e-05	-1.85242	down	--
GRMZM2G030542	5.38689e-06	0.958786	normal	1.68719e-43	-1.70435	down	0.00010587	-0.740407	normal	0.137462	-0.297692	normal	0.00293389	0.673976	normal	Regulator of chromosome condensation (RCC1) repeat
GRMZM2G030571	1.04524e-07	-2.75663	down	0.000899712	1.47502	up	--	--	--	0.000578344	-1.18977	down	2.53512e-20	-4.10228	down	Aminotransferase class-III
GRMZM2G030606	0.00717902	-1.00421	down	0.521171	-0.205852	normal	0.000305411	-1.22395	down	0.00423439	-0.817936	normal	1.12871e-08	-1.83586	down	--
GRMZM2G030636	0.0148608	1.16774	normal	--	--	--	0.00342434	1.47849	up	0.220109	-0.658708	normal	0.303422	0.526003	normal	alpha/beta hydrolase fold
GRMZM2G030717	0.669357	0.370536	normal	0.477011	0.518739	normal	0.00133467	1.07515	up	0.207277	-0.930825	normal	0.0464332	-0.659195	normal	Aspartic acid proteinase inhibitor
GRMZM2G030784	1.31968e-08	0.858835	normal	2.46084e-66	-1.30367	down	0.000610142	-0.446835	normal	0.000713065	-0.269793	normal	3.30379e-06	0.602195	normal	Triosephosphate isomerase
GRMZM2G030794	--	--	--	5.13775e-06	-2.06882	down	0.110235	-0.781244	normal	--	--	--	0.520229	0.458084	normal	--
GRMZM2G030809	4.68988e-09	1.9134	up	0.00619608	1.21274	up	5.56087e-25	3.18089	up	0.857832	-0.0979031	normal	9.65519e-09	1.84945	up	--
GRMZM2G030823	0.589286	-0.198199	normal	1.78577e-30	-1.93426	down	1.05203e-23	-2.1339	down	0.614318	-0.150481	normal	0.267025	-0.343178	normal	FBD
GRMZM2G030862	--	--	--	1.65456e-05	-2.71615	down	0.0732809	-0.854906	normal	7.6846e-06	-2.9601	down	0.0449195	-1.10599	normal	Aminotransferase class I and II
GRMZM2G030877	0.0326375	-0.573858	normal	4.02572e-12	1.98028	up	5.8979e-06	1.40467	up	1.23619e-07	1.59835	up	0.00179931	1.04534	up	Seed dormancy control
GRMZM2G030945	--	--	--	--	--	--	--	--	--	2.27646e-06	-1.89535	down	1.40885e-17	-4.1127	down	--
GRMZM2G030955	0.0863304	-0.600975	normal	0.000619334	-0.885615	normal	6.13702e-10	-1.50973	down	0.0972997	-0.553867	normal	0.000196642	-1.16204	down	RING-type zinc-finger
GRMZM2G031004	--	--	--	--	--	--	--	--	--	7.69094e-11	-3.51412	down	9.62532e-13	-4.60369	down	Glycosyl hydrolase family 10
GRMZM2G031028	2.39267e-17	-1.56131	down	4.6176e-11	0.943208	normal	0.00349534	-0.630716	normal	0.0124623	0.424228	normal	5.47697e-07	-1.12967	down	PAP_fibrillin
GRMZM2G031033	0.354736	0.627219	normal	--	--	--	0.000579926	2.1659	up	6.68946e-05	-1.98748	down	0.000340387	-1.40852	down	--
GRMZM2G031043	3.36692e-05	-0.607858	normal	0.0115495	0.314702	normal	0.0424133	-0.302731	normal	0.00146596	-0.414122	normal	9.79839e-12	-1.01481	down	Rab-GTPase-TBC domain
GRMZM2G031057	0.000211078	1.4386	up	0.0182064	1.1565	normal	4.03583e-12	2.63549	up	0.773496	-0.167323	normal	0.00151917	1.2956	up	--
GRMZM2G031102	--	--	--	2.90702e-10	-2.63071	down	1.46415e-24	-6.04784	down	--	--	--	--	--	--	Probable lipid transfer
GRMZM2G031125	0.69592	0.130665	normal	0.0210764	0.617679	normal	0.000880321	0.746342	normal	3.5088e-05	1.24614	up	2.90166e-07	1.40216	up	Cytochrome P450
GRMZM2G031139	8.56458e-07	-1.14555	down	5.17487e-10	-0.980848	normal	2.0113e-31	-2.1408	down	0.303024	-0.238374	normal	2.76478e-09	-1.38249	down	--
GRMZM2G031143	2.81369e-10	-1.1761	down	0.000116105	0.378918	normal	6.87887e-06	-0.810887	normal	2.08075e-05	0.467825	normal	0.000257005	-0.707309	normal	--
GRMZM2G031169	0.00616606	1.44449	up	--	--	--	0.00888801	1.18817	up	--	--	--	0.0291895	1.09119	normal	NAD(P)H-binding
GRMZM2G031177	1.2359e-09	0.887962	normal	0.566135	0.0799755	normal	4.2359e-13	0.959776	normal	0.0006097	0.640352	normal	3.98343e-14	1.53343	up	MatE
GRMZM2G031200	1.74479e-10	-1.32908	down	9.49984e-100	5.74647	up	1.70719e-161	4.53431	up	1.11172e-39	3.40123	up	2.83197e-41	2.1359	up	No apical meristem (NAM) protein
GRMZM2G031204	3.53267e-05	1.0387	up	0.0461675	-0.426664	normal	0.0123834	0.607287	normal	0.0001295	-0.869891	normal	0.548999	0.182719	normal	FKBP-type peptidyl-prolyl cis-trans isomerase
GRMZM2G031239	0.000174936	-0.748895	normal	0.36959	0.16721	normal	0.00963811	-0.589307	normal	3.9558e-14	1.34368	up	0.0142834	0.600838	normal	Apoptosis antagonizing transcription factor
GRMZM2G031317	2.86707e-39	-2.99978	down	6.83962e-85	6.87483	up	1.75575e-13	3.75659	up	0.0317347	0.381073	normal	1.66628e-33	-2.63781	down	Phytosulfokine precursor protein (PSK)
GRMZM2G031331	--	--	--	--	--	--	--	--	--	1.27471e-05	-2.23084	down	3.60977e-17	-6.48551	down	Mlo family
GRMZM2G031420	0.00105179	0.871466	normal	5.59846e-08	-1.13968	down	0.266192	-0.270877	normal	0.0387677	-0.590439	normal	0.341754	0.290794	normal	Protein of unknown function (DUF1242)
GRMZM2G031447	--	--	--	--	--	--	--	--	--	2.1103e-06	-2.18044	down	2.97123e-13	-4.89297	down	alpha/beta hydrolase fold
GRMZM2G031479	4.72857e-27	-2.48395	down	2.26069e-73	3.33194	up	0.0159183	0.806176	normal	2.39492e-28	2.65922	up	0.703576	0.179986	normal	NHL repeat
GRMZM2G031496	2.48503e-25	1.41621	up	2.83649e-17	-0.77335	normal	5.02821e-10	0.639042	normal	0.261195	-0.129456	normal	1.97279e-34	1.30136	up	NUBPL iron-transfer P-loop NTPase
GRMZM2G031528	0.390981	-0.32992	normal	0.316917	0.266241	normal	0.847934	-0.0773803	normal	0.000100778	1.21868	up	0.0285563	0.892801	normal	Heavy-metal-associated domain
GRMZM2G031536	5.69539e-51	-8.44473	down	2.63739e-51	8.22366	up	--	--	--	1.3694e-09	1.01993	up	1.57271e-30	-7.99184	down	Protein kinase domain
GRMZM2G031572	4.14915e-18	0.942712	normal	1.75564e-161	-1.65989	down	2.74078e-17	-0.722494	normal	0.0282465	0.166704	normal	4.67778e-33	1.12023	up	Serine carboxypeptidase S28
GRMZM2G031580	0.548178	0.27725	normal	0.837706	-0.0914749	normal	0.683527	0.177765	normal	5.55957e-10	-1.85559	down	8.13491e-07	-1.57691	down	--
GRMZM2G031586	0.282851	0.501956	normal	8.22833e-05	-1.067	down	0.14403	-0.548524	normal	0.158618	-0.501455	normal	0.967012	0.0208759	normal	--
GRMZM2G031607	0.0724561	0.525271	normal	0.000174305	0.947715	normal	1.18705e-07	1.45908	up	0.543866	0.181623	normal	0.012285	0.718951	normal	--
GRMZM2G031609	1.96222e-08	-0.966389	normal	5.22134e-19	1.33452	up	0.104218	0.355378	normal	0.00525442	0.434173	normal	0.0090695	-0.525985	normal	CBS domain
GRMZM2G031625	3.52369e-05	1.16407	up	0.00409639	-0.779332	normal	0.257804	0.373709	normal	0.0086158	-0.727396	normal	0.149601	0.450779	normal	Reactive mitochondrial oxygen species modulator 1
GRMZM2G031628	--	--	--	2.38424e-53	-4.70165	down	4.94939e-56	-4.38442	down	--	--	--	--	--	--	Glycosyl hydrolase family 1
GRMZM2G031637	0.157457	0.613838	normal	0.000274272	-1.28383	down	0.0307834	-0.687916	normal	0.245883	-0.572159	normal	0.937328	0.0394889	normal	--
GRMZM2G031660	0.556095	0.140957	normal	5.08164e-187	-2.21537	down	1.5774e-37	-2.06586	down	0.0783394	-0.236452	normal	0.715108	-0.0864509	normal	Glycosyl hydrolase family 1
GRMZM2G031721	0.0595505	0.975176	normal	0.000868908	-1.40539	down	0.332741	-0.429716	normal	--	--	--	0.0026294	2.42116	up	Putative peptidoglycan binding domain
GRMZM2G031724	0.609053	-0.315307	normal	0.0866247	-0.77725	normal	0.0052389	-1.1322	down	--	--	--	--	--	--	2OG-Fe(II) oxygenase superfamily
GRMZM2G031733	0.12862	-0.811403	normal	9.95824e-05	1.81054	up	0.0226613	1.01847	normal	2.21076e-05	2.11711	up	0.00704737	1.365	up	--
GRMZM2G031761	0.000447864	-1.34562	down	1.15431e-09	2.16243	up	0.164772	0.765945	normal	0.0613481	0.90595	normal	0.575147	-0.390957	normal	Tetratricopeptide repeat
GRMZM2G031802	1.0504e-10	0.808139	normal	1.38476e-05	-0.478717	normal	0.0143169	0.321419	normal	0.000222039	0.474215	normal	2.6854e-23	1.29282	up	ER lumen protein retaining receptor
GRMZM2G031904	3.94687e-11	2.68258	up	0.0614469	-0.854088	normal	9.55072e-22	1.91073	up	0.108348	-0.818692	normal	1.54734e-14	1.95343	up	--
GRMZM2G031909	--	--	--	--	--	--	--	--	--	8.87769e-24	-6.49982	down	1.85824e-19	-5.5842	down	Cytochrome P450
GRMZM2G031917	2.73257e-62	4.77805	up	0.110967	-0.80404	normal	3.30497e-58	3.95216	up	--	--	--	3.48645e-11	5.21952	up	--
GRMZM2G031941	5.57581e-05	1.24202	up	0.504174	0.250485	normal	2.65389e-07	1.49126	up	0.958515	-0.0265614	normal	0.000587115	1.22652	up	FAD binding domain
GRMZM2G031952	1.83148e-08	-1.25029	down	9.49242e-07	1.0201	up	0.386618	-0.239621	normal	0.185857	0.32444	normal	0.000351157	-0.920419	normal	ELMO/CED-12 family
GRMZM2G031981	0.000902816	0.964577	normal	0.114547	0.613363	normal	6.16029e-06	1.56184	up	0.00711467	-0.79962	normal	0.579127	0.174407	normal	F-box domain
GRMZM2G032024	--	--	--	0.472443	-0.643104	normal	0.000739562	-2.30765	down	0.364786	-0.744672	normal	--	--	--	Per1-like family
GRMZM2G032028	0.119489	0.455738	normal	3.9474e-24	-1.6821	down	1.00431e-11	-1.22906	down	0.000156799	0.929067	normal	1.89352e-09	1.40356	up	--
GRMZM2G032042	2.21466e-74	-6.8407	down	0.0839151	-0.25932	normal	8.4275e-90	-7.15947	down	8.12515e-56	3.9798	up	--	--	--	C2H2-type zinc finger
GRMZM2G032047	0.133197	-0.419615	normal	3.63073e-17	1.50506	up	3.4242e-05	1.05868	up	8.67141e-11	1.20684	up	0.00300509	0.786151	normal	Protein of unknown function, DUF538
GRMZM2G032070	3.6557e-14	-1.32062	down	8.80974e-09	0.879317	normal	0.0335222	-0.450757	normal	9.43873e-05	0.801921	normal	0.0710204	-0.505175	normal	K-box region
GRMZM2G032095	2.26741e-06	2.47186	up	--	--	--	8.83063e-10	2.52276	up	--	--	--	0.000945962	1.57857	up	FAE1/Type III polyketide synthase-like protein
GRMZM2G032104	0.74002	0.0869041	normal	0.00876316	0.619081	normal	1.71341e-11	0.708357	normal	1.40365e-09	-1.41538	down	1.22656e-36	-1.34627	down	SpoU rRNA Methylase family
GRMZM2G032107	--	--	--	--	--	--	--	--	--	9.4206e-08	-3.62222	down	0.00157834	-2.44195	down	--
GRMZM2G032145	0.000311512	-0.954337	normal	1.47251e-33	-1.13399	down	2.69736e-20	-2.08278	down	9.12644e-32	-1.72814	down	1.33449e-25	-2.66397	down	BURP domain
GRMZM2G032154	0.0358244	0.845768	normal	0.956866	-0.0239791	normal	0.0198165	0.822836	normal	0.00967197	1.39275	up	1.81104e-06	2.30427	up	--
GRMZM2G032214	0.981911	-0.0126072	normal	0.00117373	1.06711	up	0.016057	1.02284	normal	0.967502	-0.0188483	normal	0.970144	-0.0216182	normal	BT1 family
GRMZM2G032218	0.895968	0.0442981	normal	1.69603e-35	2.42209	up	3.03188e-19	2.4275	up	0.00314596	-0.522539	normal	0.0881352	-0.466675	normal	ABC transporter transmembrane region
GRMZM2G032219	--	--	--	4.837e-24	-5.34871	down	0.00120389	-1.3709	down	--	--	--	0.312084	0.958359	normal	Mlo family
GRMZM2G032222	0.00230758	0.356657	normal	2.92778e-14	-0.597187	normal	0.0158297	-0.248594	normal	2.19117e-87	-1.46514	down	1.16943e-29	-1.09887	down	Electron transfer flavoprotein-ubiquinone oxidoreductase, 4Fe-4S
GRMZM2G032253	0.0530023	1.14623	normal	--	--	--	0.0198949	1.23762	normal	--	--	--	9.17442e-07	3.89754	up	2Fe-2S iron-sulfur cluster binding domain
GRMZM2G032276	0.00450166	1.26536	up	0.111462	0.85534	normal	8.90573e-10	2.20646	up	0.0088255	1.57443	up	8.74503e-13	3.03228	up	Transferase family
GRMZM2G032280	0.731897	0.0885426	normal	1.45841e-10	1.21026	up	7.38162e-10	1.28674	up	0.00188304	0.657743	normal	0.0011495	0.755285	normal	Biotin/lipoate A/B protein ligase family
GRMZM2G032337	5.22761e-05	-0.602393	normal	4.62868e-07	-0.556163	normal	1.10046e-20	-1.16812	down	0.0484209	0.340058	normal	0.22688	-0.253496	normal	Protein kinase domain
GRMZM2G032339	0.0275968	0.721277	normal	0.470751	-0.226523	normal	0.0781476	0.492013	normal	0.00787647	0.899767	normal	3.94054e-09	1.65841	up	K-box region
GRMZM2G032350	0.725011	-0.157845	normal	0.875956	0.0627446	normal	0.766019	-0.105811	normal	0.00415268	-0.895871	normal	3.33206e-05	-1.06641	down	Spindle and kinetochore-associated protein 2
GRMZM2G032419	0.00246733	1.21358	up	0.209934	0.623551	normal	8.1816e-06	1.83587	up	0.00249351	-1.13503	down	0.819982	0.0989311	normal	Gar1/Naf1 RNA binding region
GRMZM2G032528	7.41275e-09	-2.18943	down	1.25116e-23	6.20215	up	--	--	--	2.33865e-23	6.45266	up	--	--	--	--
GRMZM2G032547	0.00655408	1.24031	up	0.811734	0.140159	normal	0.00123206	1.38781	up	0.633255	0.303454	normal	0.000142867	1.60806	up	Clp amino terminal domain, pathogenicity island component
GRMZM2G032602	0.779598	0.16842	normal	0.715658	-0.174993	normal	0.983546	-0.0113043	normal	3.04553e-08	-1.80572	down	1.29183e-05	-1.62659	down	NB-ARC domain
GRMZM2G032655	--	--	--	2.41529e-07	-2.58055	down	9.31011e-05	-2.07499	down	--	--	--	--	--	--	Myb-like DNA-binding domain
GRMZM2G032694	9.39382e-10	-0.773711	normal	6.09978e-07	0.409562	normal	0.000529517	-0.375124	normal	3.01136e-32	1.01359	up	0.0467401	0.246018	normal	Protein kinase domain
GRMZM2G032759	--	--	--	2.32691e-50	-8.18449	down	1.87221e-46	-8.24988	down	3.57032e-51	-8.54218	down	3.71433e-41	-8.91113	down	--
GRMZM2G032766	0.909303	0.0502328	normal	0.000301681	1.00765	up	1.16711e-06	1.06371	up	0.985146	0.00729239	normal	0.863055	0.0643498	normal	C2 domain
GRMZM2G032807	5.11147e-12	-1.547	down	2.77229e-37	1.63039	up	0.854855	0.0537774	normal	2.91266e-06	0.589184	normal	2.40067e-05	-0.963751	normal	--
GRMZM2G032887	0.00113383	2.74753	up	--	--	--	2.34422e-21	6.23404	up	0.000609716	-2.87821	down	0.734801	0.151696	normal	Elongation factor Tu C-terminal domain
GRMZM2G032896	1.43164e-05	0.898747	normal	0.635	-0.100669	normal	6.92716e-07	0.793783	normal	0.279962	0.25686	normal	1.14045e-10	1.1709	up	Cytochrome P450
GRMZM2G032910	1.30087e-10	-1.32404	down	6.45273e-05	0.648022	normal	2.47023e-05	-0.694364	normal	1.86203e-08	0.975315	normal	0.0846046	-0.349772	normal	alpha/beta hydrolase fold
GRMZM2G032912	--	--	--	--	--	--	--	--	--	0.00154007	-2.19389	down	0.10459	-0.919207	normal	Bromodomain
GRMZM2G032955	--	--	--	--	--	--	--	--	--	0.041104	-1.21558	normal	0.00709367	-2.22154	down	PRA1 family protein
GRMZM2G033027	0.19324	-0.449006	normal	2.87152e-06	-0.972365	normal	8.95224e-10	-1.43341	down	0.479039	0.222804	normal	0.519584	-0.221892	normal	--
GRMZM2G033098	0.909362	-0.0607701	normal	0.323865	0.36061	normal	0.226177	0.297307	normal	0.0883142	-0.91691	normal	1.77156e-05	-1.05902	down	Cytochrome P450
GRMZM2G033175	--	--	--	--	--	--	--	--	--	1.63703e-06	-2.22276	down	0.00572222	-1.53199	down	Domain of unknown function (DUF4228)
GRMZM2G033199	0.276071	0.222393	normal	7.04118e-20	1.58102	up	7.7405e-24	1.79585	up	1.09201e-05	0.82998	normal	1.17381e-07	1.06377	up	DNA polymerase delta, subunit 4
GRMZM2G033236	3.26066e-10	1.6746	up	1.28593e-37	-2.84816	down	1.76746e-09	-1.18065	down	1.05999e-244	-5.15972	down	7.40619e-138	-3.45995	down	--
GRMZM2G033267	0.229142	0.550452	normal	0.911739	0.0511289	normal	0.104169	0.603283	normal	0.337929	0.430322	normal	0.00232921	1.02052	up	NPH3 family
GRMZM2G033283	0.264423	-0.280591	normal	5.40506e-15	1.2236	up	2.4849e-07	0.929667	normal	2.09769e-09	0.963162	normal	0.000228659	0.688026	normal	Translation initiation factor SUI1
GRMZM2G033348	0.112644	-0.372081	normal	0.0458551	-0.238054	normal	0.0031355	-0.616263	normal	2.6502e-18	-0.834368	normal	3.13455e-10	-1.19513	down	Vacuolar-sorting-associated 13 protein C-terminal
GRMZM2G033356	2.6753e-05	1.06037	up	2.49019e-10	-1.22776	down	0.517601	-0.167492	normal	1.21118e-23	-1.86475	down	0.000508499	-0.785183	normal	Helix-loop-helix DNA-binding domain
GRMZM2G033359	0.3587	0.44037	normal	0.00191617	-1.09166	down	0.00488751	-0.67509	normal	2.09429e-08	-1.86036	down	5.86168e-09	-1.44252	down	GH3 auxin-responsive promoter
GRMZM2G033375	2.07443e-06	-1.86227	down	0.222985	-0.357807	normal	1.60272e-11	-2.2555	down	0.000508161	1.21029	up	0.185069	-0.666693	normal	Ubiquitin carboxyl-terminal hydrolase, family 1
GRMZM2G033413	6.9808e-05	0.699367	normal	6.58196e-108	-2.00005	down	1.15623e-16	-1.29648	down	4.65016e-08	-0.665998	normal	0.843139	0.045362	normal	bZIP transcription factor
GRMZM2G033493	0.238573	-0.414207	normal	0.237352	-0.333539	normal	0.000701532	-0.768266	normal	3.74034e-10	-1.4495	down	2.24294e-21	-1.88122	down	Thylakoid formation protein
GRMZM2G033515	0.0729401	-0.803566	normal	0.48302	-0.276776	normal	0.000257154	-1.12203	down	1.45501e-08	-2.83098	down	4.15664e-62	-3.95034	down	Isocitrate/isopropylmalate dehydrogenase
GRMZM2G033519	1.62619e-10	-2.48311	down	3.57516e-09	1.82905	up	0.224526	-0.671903	normal	0.0389751	-0.592313	normal	7.16658e-16	-3.11	down	NB-ARC domain
GRMZM2G033521	0.46523	-0.146836	normal	1.45735e-24	-1.13783	down	1.84787e-27	-1.29377	down	0.0372039	0.428474	normal	0.235426	0.290619	normal	U-box domain
GRMZM2G033544	1.83521e-07	0.869232	normal	8.08905e-14	1.2397	up	8.08192e-38	2.10186	up	1.81903e-50	3.36489	up	6.07724e-91	4.26708	up	Mycolic acid cyclopropane synthetase
GRMZM2G033555	1.00595e-12	-1.15758	down	3.05876e-34	1.35261	up	0.354213	0.179057	normal	0.00558249	-0.291012	normal	7.77139e-22	-1.44382	down	NAD dependent epimerase/dehydratase family
GRMZM2G033566	0.0393218	0.986236	normal	--	--	--	7.87057e-07	2.23422	up	--	--	--	2.08248e-06	2.00984	up	GDSL-like Lipase/Acylhydrolase
GRMZM2G033570	0.0175604	-0.524806	normal	2.34728e-09	-0.493087	normal	6.2064e-08	-1.02279	down	0.0291913	-0.205133	normal	0.000211401	-0.722945	normal	Ethylene insensitive 3
GRMZM2G033641	3.83521e-07	-0.597536	normal	1.79986e-42	1.07506	up	0.000160329	0.465504	normal	2.77384e-69	1.39305	up	1.69945e-11	0.80101	normal	CRAL/TRIO domain
GRMZM2G033644	1.38369e-17	-1.15854	down	3.70479e-11	0.692341	normal	0.000218792	-0.478193	normal	9.81823e-06	-0.440828	normal	5.79805e-43	-1.5948	down	2-oxoacid dehydrogenases acyltransferase (catalytic domain)
GRMZM2G033653	0.145751	-0.493424	normal	0.0456458	0.548071	normal	0.915952	0.0414675	normal	0.00670344	-0.650803	normal	4.12121e-05	-1.14345	down	Ribosomal protein S6
GRMZM2G033746	3.9717e-07	-1.82688	down	0.0595077	0.54743	normal	6.89566e-06	-1.32523	down	0.000732179	1.10605	up	0.0678498	-0.738519	normal	Glycosyl transferase family 90
GRMZM2G033767	0.0181132	-1.05565	normal	0.0250527	0.947088	normal	0.819063	-0.116716	normal	0.00357339	1.46663	up	0.477139	0.451582	normal	haloacid dehalogenase-like hydrolase
GRMZM2G033785	0.000424089	1.52247	up	0.108935	-0.831403	normal	0.154015	0.650981	normal	--	--	--	6.95631e-07	2.0836	up	Kinesin motor domain
GRMZM2G033787	0.699719	0.154727	normal	0.0291801	0.663755	normal	4.85278e-05	0.827184	normal	0.00115469	1.04457	up	3.06992e-08	1.236	up	--
GRMZM2G033828	1.12859e-09	-0.838065	normal	7.94175e-17	1.05049	up	0.238899	0.202684	normal	0.0277772	-0.273042	normal	5.30382e-16	-1.10433	down	Retinoblastoma-associated protein A domain
GRMZM2G033862	0.139829	-0.464291	normal	1.98854e-27	6.54046	up	7.4834e-21	6.15172	up	0.00731831	-0.643586	normal	0.000103087	-1.1037	down	--
GRMZM2G033867	0.0002761	-0.689974	normal	2.51112e-06	0.56781	normal	0.488358	-0.135777	normal	9.42416e-26	1.56825	up	2.23572e-05	0.880739	normal	zinc-finger of the FCS-type, C2-C2
GRMZM2G033884	0.702802	-0.194796	normal	0.000943547	1.54073	up	0.00645425	1.34817	up	0.855964	0.106582	normal	0.89911	-0.0788175	normal	PPR repeat
GRMZM2G033926	4.99304e-06	-0.741647	normal	1.30264e-06	-0.550398	normal	7.98908e-27	-1.30422	down	0.00054478	-0.449456	normal	1.75691e-17	-1.18627	down	Acyltransferase
GRMZM2G033937	0.00268942	-0.653871	normal	0.000117337	0.650383	normal	0.949725	-0.0163213	normal	1.08257e-13	1.48269	up	0.000753343	0.835837	normal	Rhomboid family
GRMZM2G033962	6.53388e-09	1.85209	up	2.01513e-99	-3.98503	down	5.26752e-36	-2.10707	down	0.34435	-0.482466	normal	0.000365306	1.36156	up	Response regulator receiver domain
GRMZM2G034013	0.0526179	0.929241	normal	0.00501439	-1.07274	down	0.78137	-0.133573	normal	0.593935	0.332166	normal	0.00920613	1.29906	up	Ribosomal protein S31e
GRMZM2G034052	0.739306	0.172328	normal	0.000142736	1.76199	up	1.29548e-05	1.95449	up	0.35788	0.471194	normal	0.163251	0.667774	normal	Protein kinase domain
GRMZM2G034061	8.84716e-10	3.65938	up	7.21845e-39	-5.63836	down	6.76646e-07	-1.75044	down	3.25813e-52	-6.44707	down	6.2771e-14	-2.53336	down	Sugar (and other) transporter
GRMZM2G034069	1.43566e-07	-0.784541	normal	3.42205e-61	1.84713	up	6.87481e-14	1.04965	up	0.00234228	-0.326136	normal	2.53559e-17	-1.1047	down	NAD dependent epimerase/dehydratase family
GRMZM2G034079	5.4347e-10	1.90369	up	0.980641	-0.013222	normal	1.35716e-09	1.88174	up	0.268254	0.71118	normal	1.03903e-10	2.66598	up	Quinolinate phosphoribosyl transferase, C-terminal domain
GRMZM2G034152	0.137431	0.836516	normal	--	--	--	1.51825e-05	2.33883	up	0.259182	-0.73687	normal	0.905412	0.0808715	normal	Flavin containing amine oxidoreductase
GRMZM2G034157	0.000945185	1.12329	up	0.466606	-0.310487	normal	0.000476083	0.815998	normal	0.287522	-0.468911	normal	0.0055889	0.672665	normal	Hsp20/alpha crystallin family
GRMZM2G034183	0.00566371	0.625232	normal	2.10894e-12	-1.01056	down	0.0738338	-0.385926	normal	0.8401	0.0528624	normal	0.00468036	0.689309	normal	Integral membrane protein S linking to the trans Golgi network
GRMZM2G034197	0.0462561	-0.746025	normal	0.000137645	1.85706	up	0.0568171	1.11885	normal	0.0224997	0.870498	normal	0.754598	0.136294	normal	Lipase (class 3)
GRMZM2G034225	0.11074	0.348062	normal	5.0142e-08	0.812425	normal	3.08019e-09	1.14745	up	4.41492e-07	0.892552	normal	7.61942e-09	1.24888	up	--
GRMZM2G034253	7.36843e-14	-4.51839	down	6.84103e-06	1.77802	up	--	--	--	0.00097421	1.37935	up	--	--	--	Histidine kinase-, DNA gyrase B-, and HSP90-like ATPase
GRMZM2G034302	0.208257	0.299537	normal	2.35239e-14	-1.22386	down	3.07088e-09	-0.932735	normal	0.00501632	-0.598304	normal	0.203388	-0.291037	normal	MFS/sugar transport protein
GRMZM2G034383	0.270091	0.253792	normal	1.83662e-11	0.951099	normal	1.59066e-09	1.18966	up	9.08856e-09	0.904202	normal	1.67236e-08	1.16556	up	--
GRMZM2G034442	1.07839e-19	5.98925	up	--	--	--	3.18144e-18	5.84467	up	--	--	--	5.6029e-17	6.46382	up	Protein phosphatase 2C
GRMZM2G034471	0.0933857	0.826975	normal	0.0109169	1.08796	normal	2.39137e-09	1.97662	up	0.0898075	-0.691493	normal	0.657194	0.168952	normal	Cytochrome P450
GRMZM2G034511	0.227717	0.301899	normal	0.0241903	-0.310015	normal	0.955344	-0.0140594	normal	1.03201e-15	1.56234	up	8.68786e-15	1.87187	up	Membrane magnesium transporter
GRMZM2G034526	0.00095693	-0.709054	normal	1.47936e-08	1.02429	up	0.145628	0.304143	normal	1.53553e-05	-0.733676	normal	5.37355e-16	-1.44073	down	--
GRMZM2G034611	0.533798	0.278208	normal	0.013901	-0.672663	normal	0.294205	-0.389586	normal	5.70684e-08	-1.44943	down	0.000871995	-1.15166	down	Protein kinase domain
GRMZM2G034623	0.387917	0.291134	normal	5.21055e-15	-2.1301	down	5.34716e-27	-1.88812	down	0.0102643	-0.549041	normal	0.27995	-0.247827	normal	--
GRMZM2G034631	0.0661298	0.29278	normal	0.0728848	0.268892	normal	0.000572275	0.552677	normal	2.21605e-05	0.706469	normal	9.88183e-09	1.00895	up	Sulfotransferase family
GRMZM2G034638	0.0094376	-1.11824	down	0.0359216	0.867398	normal	0.627536	-0.256372	normal	0.775875	0.161858	normal	0.0878359	-0.942772	normal	TCP family transcription factor
GRMZM2G034645	--	--	--	--	--	--	--	--	--	0.00435659	-1.39778	down	0.0426215	-1.05257	normal	PPR repeat
GRMZM2G034647	0.0299077	1.16623	normal	0.186121	-0.709041	normal	0.395792	0.448452	normal	--	--	--	1.15226e-06	2.465	up	Cyclin, N-terminal domain
GRMZM2G034668	0.00416221	2.15165	up	--	--	--	0.168771	0.878437	normal	--	--	--	0.250929	0.806246	normal	Eukaryotic cytochrome b561
GRMZM2G034724	0.000342862	1.13692	up	0.162816	-0.581199	normal	0.00198501	0.543145	normal	3.32796e-06	1.37307	up	2.47802e-31	2.56935	up	Cupin
GRMZM2G034727	--	--	--	--	--	--	--	--	--	0	-6.26138	down	4.16752e-137	-8.84723	down	--
GRMZM2G034748	4.3981e-07	-1.27356	down	7.56011e-15	-1.01955	down	1.61517e-28	-2.30159	down	0.000179943	1.11769	up	0.786164	-0.133376	normal	F-box domain
GRMZM2G034779	0.0445766	-0.463725	normal	1.85588e-07	-0.741239	normal	1.02567e-11	-1.21346	down	0.701378	-0.0812441	normal	0.0106654	-0.539106	normal	Protein kinase domain
GRMZM2G034811	5.78059e-08	1.81075	up	4.19515e-11	4.59517	up	1.28793e-24	6.54938	up	1.11355e-10	4.75665	up	1.58535e-22	7.18008	up	DEAD/DEAH box helicase
GRMZM2G034828	0.00847562	0.794569	normal	0.0186718	-0.653247	normal	0.659677	0.134394	normal	0.00714591	1.10234	up	2.8985e-08	1.93304	up	Kinesin motor domain
GRMZM2G034833	1.51511e-05	1.0526	up	0.793283	-0.0958329	normal	0.00376597	0.932649	normal	0.553758	-0.222345	normal	0.0103978	0.832552	normal	DHHC palmitoyltransferase
GRMZM2G034840	0.186111	0.429174	normal	0.00149542	0.975995	normal	9.8359e-05	1.38181	up	0.000443333	0.999535	normal	5.42398e-06	1.44178	up	Auxin response factor
GRMZM2G034848	3.74292e-07	-0.701324	normal	2.07039e-09	0.754423	normal	0.811254	0.043754	normal	0.00275464	-0.367951	normal	5.66174e-15	-1.06211	down	Enolase, C-terminal TIM barrel domain
GRMZM2G034896	2.03005e-18	1.72935	up	2.04988e-25	-1.17825	down	0.00231567	0.5569	normal	0.888455	0.0270671	normal	3.37868e-23	1.7772	up	Ferric reductase NAD binding domain
GRMZM2G034917	0.0928544	-0.867219	normal	4.00392e-13	3.47679	up	--	--	--	7.85508e-05	1.72316	up	0.165823	0.835931	normal	alpha/beta hydrolase fold
GRMZM2G034947	--	--	--	1.20564e-59	-4.45572	down	4.7865e-46	-7.57206	down	2.21888e-65	-4.62924	down	1.93866e-42	-8.03766	down	GRF zinc finger
GRMZM2G035008	0.805714	-0.266892	normal	2.6204e-06	2.33793	up	--	--	--	0.0858789	1.52691	normal	--	--	--	--
GRMZM2G035092	--	--	--	--	--	--	--	--	--	0.000498597	-2.1853	down	1.26741e-11	-5.57407	down	SRF-type transcription factor (DNA-binding and dimerisation domain)
GRMZM2G035098	0.112693	0.707192	normal	0.000738993	2.12134	up	1.90286e-05	2.74692	up	0.112905	1.18505	normal	0.0174188	1.87101	normal	RIO1 family
GRMZM2G035103	3.50332e-08	3.54772	up	--	--	--	7.26392e-10	4.06845	up	8.64271e-16	-4.62296	down	0.0118647	-0.997718	normal	C2H2-type zinc finger
GRMZM2G035131	0.72622	-0.0848067	normal	2.90508e-15	1.58595	up	9.32523e-15	1.4972	up	0.000305478	0.753868	normal	0.000853595	0.680715	normal	Serine aminopeptidase, S33
GRMZM2G035168	0.00731976	-1.32383	down	0.0463712	0.46461	normal	0.0774568	-0.900078	normal	0.239236	0.306598	normal	0.0403871	-1.05965	normal	Type III restriction enzyme, res subunit
GRMZM2G035213	6.12237e-16	2.37405	up	--	--	--	5.94597e-21	3.03951	up	--	--	--	0.00530579	2.63365	up	Methyltransferase domain
GRMZM2G035223	0.500079	0.505127	normal	0.00374844	-1.44262	down	0.0909067	-0.915165	normal	0.0461052	-1.21268	normal	0.295924	-0.707669	normal	--
GRMZM2G035282	0.108475	0.840009	normal	0.484744	-0.377048	normal	0.3474	0.458726	normal	5.38916e-15	-2.56891	down	5.21373e-08	-1.70829	down	UDP-glucoronosyl and UDP-glucosyl transferase
GRMZM2G035356	6.25803e-06	1.07021	up	0.0445078	0.503041	normal	9.82041e-16	1.57569	up	0.426107	-0.229894	normal	0.000128608	0.856332	normal	--
GRMZM2G035370	7.82294e-08	-2.61967	down	0.000340977	1.3335	up	--	--	--	0.0165182	0.991175	normal	0.0101476	-1.65105	normal	MYB-CC type transfactor, LHEQLE motif
GRMZM2G035377	0.215125	0.60844	normal	0.0933065	0.881789	normal	0.000148495	1.53522	up	0.117695	-0.77893	normal	0.719051	-0.175936	normal	Exostosin family
GRMZM2G035405	1.52413e-05	0.864024	normal	3.72666e-32	-1.17395	down	0.0951084	-0.307174	normal	0.835853	-0.0334869	normal	2.4311e-06	0.845144	normal	Auxin response factor
GRMZM2G035421	0.0702552	-0.290006	normal	4.60972e-27	1.41034	up	2.20351e-15	1.11104	up	1.78277e-06	-0.561294	normal	4.38925e-11	-0.843618	normal	Domain of unknown function (DUF3336)
GRMZM2G035430	0.0731725	-0.467794	normal	3.53273e-13	-0.795261	normal	5.61335e-09	-1.26325	down	0.243678	0.223884	normal	0.425564	-0.239907	normal	CASC3/Barentsz eIF4AIII binding
GRMZM2G035502	2.51707e-27	1.31782	up	0.704843	-0.055985	normal	5.71839e-26	1.25325	up	0.00542314	-0.363018	normal	9.01037e-16	0.964667	normal	Glutathione S-transferase, N-terminal domain
GRMZM2G035503	0.375006	0.253185	normal	0.487719	0.156938	normal	0.0351985	0.403781	normal	2.68305e-18	-1.56992	down	2.31752e-12	-1.31114	down	Glycosyl hydrolase family 3 C-terminal domain
GRMZM2G035542	6.16882e-05	2.0043	up	--	--	--	5.29729e-09	3.58308	up	--	--	--	0.00229027	2.30543	up	Inorganic H+ pyrophosphatase
GRMZM2G035552	0.0163139	-1.29474	normal	0.0541023	0.908591	normal	0.487367	-0.412432	normal	0.503484	-0.345998	normal	0.000722848	-1.69283	down	ACT domain
GRMZM2G035574	0.000530474	-0.798215	normal	1.93328e-14	1.74594	up	0.000812896	0.936393	normal	7.46649e-08	1.31666	up	0.0888183	0.531028	normal	Domain of unknown function (DUF4539)
GRMZM2G035584	0.0621876	-0.751316	normal	5.00022e-06	1.46895	up	0.000902251	0.72076	normal	1.30946e-07	1.79903	up	8.86047e-05	1.07273	up	Transferase family
GRMZM2G035594	0.488417	-0.182879	normal	2.43724e-05	1.03445	up	0.00260176	0.842714	normal	0.0791473	-0.379063	normal	0.0152272	-0.555921	normal	Tetrapyrrole (Corrin/Porphyrin) Methylases
GRMZM2G035595	6.25568e-06	0.806963	normal	0.164555	-0.281087	normal	0.00664146	0.515558	normal	0.0228423	0.603556	normal	2.04115e-09	1.42108	up	--
GRMZM2G035620	0.876953	0.0294852	normal	0.384413	-0.0652258	normal	0.775121	-0.0444388	normal	0	4.35473	up	8.49122e-203	4.384	up	Dienelactone hydrolase family
GRMZM2G035636	0.360983	0.786947	normal	0.13233	-1.13572	normal	0.0643986	-0.493235	normal	0.0204924	-1.77788	normal	6.86944e-08	-1.29589	down	Eukaryotic aspartyl protease
GRMZM2G035661	--	--	--	--	--	--	--	--	--	0.917645	-0.0653713	normal	0.000498568	-2.85759	down	--
GRMZM2G035664	0.669707	0.135269	normal	0.000237962	0.956817	normal	3.27182e-06	1.09119	up	0.127145	-0.393356	normal	0.299156	-0.250736	normal	PPR repeat
GRMZM2G035701	5.70813e-07	1.41872	up	0.807449	-0.0773615	normal	2.81097e-08	1.34436	up	0.000153751	-0.931557	normal	0.0370031	0.512878	normal	B3 DNA binding domain
GRMZM2G035704	--	--	--	0.00200457	-1.52922	down	0.0189324	-1.41007	normal	--	--	--	0.0503381	-1.37045	normal	Ring finger domain
GRMZM2G035709	2.89808e-11	1.15322	up	3.88545e-06	-0.811016	normal	0.06334	0.333048	normal	0.0570946	0.548374	normal	3.36891e-12	1.71029	up	FAD dependent oxidoreductase
GRMZM2G035726	0.12043	0.618964	normal	0.00142782	1.79012	up	0.000189084	2.29067	up	1.08284e-19	6.04751	up	4.67236e-21	7.04718	up	Papain family cysteine protease
GRMZM2G035790	5.49562e-09	-1.74231	down	2.77996e-05	1.07601	up	0.0294666	-0.685741	normal	0.0678685	0.594643	normal	0.00233832	-1.14089	down	POT family
GRMZM2G035809	4.75253e-05	-0.995066	normal	1.33377e-06	1.00587	up	0.99422	-0.00208447	normal	0.319404	0.24071	normal	0.0030918	-0.751744	normal	Protein kinase domain
GRMZM2G035849	0.0375794	0.347066	normal	0.00128999	-0.378166	normal	0.819056	-0.0392453	normal	0.000161558	0.762845	normal	8.52006e-07	1.11839	up	DHHC palmitoyltransferase
GRMZM2G035853	4.34233e-06	1.49032	up	5.49944e-11	4.57397	up	5.10292e-22	6.25942	up	2.38766e-70	-3.75293	down	1.5359e-32	-2.23936	down	--
GRMZM2G035890	--	--	--	--	--	--	--	--	--	1.01667e-34	-7.43366	down	1.23256e-33	-6.60037	down	Ribosome inactivating protein
GRMZM2G035893	0.00060217	1.65294	up	--	--	--	0.000701068	1.56577	up	--	--	--	6.85099e-11	4.80129	up	Inorganic H+ pyrophosphatase
GRMZM2G035944	2.03937e-96	6.35201	up	5.81005e-124	-6.82867	down	0.00316833	-0.492054	normal	3.11284e-36	-4.73982	down	1.15205e-13	1.56733	up	TCP family transcription factor
GRMZM2G035996	1.71519e-05	0.880506	normal	1.0956e-29	-1.2332	down	0.0754696	-0.349918	normal	0.147895	0.223677	normal	5.17445e-09	1.11722	up	HORMA domain
GRMZM2G036007	0.0385673	0.491511	normal	0.062203	0.544112	normal	0.00217543	1.01443	up	1.09502e-09	-0.964251	normal	0.0419357	-0.458852	normal	Inositol monophosphatase family
GRMZM2G036086	0.946598	-0.0301126	normal	2.26117e-06	1.31629	up	0.000428339	1.25787	up	0.0973868	0.543057	normal	0.20391	0.520619	normal	Peroxisomal biogenesis factor 11 (PEX11)
GRMZM2G036113	0.272132	-0.437482	normal	0.0404478	0.734251	normal	0.561807	0.282816	normal	8.95346e-05	-0.97916	normal	9.48792e-06	-1.41302	down	MORN repeat
GRMZM2G036120	0.199963	-0.764775	normal	--	--	--	--	--	--	0.2713	-0.595421	normal	0.00915288	-1.39978	down	ENTH domain
GRMZM2G036134	6.845e-06	2.70821	up	--	--	--	0.000844089	1.82577	up	--	--	--	9.07869e-07	3.58046	up	Xylanase inhibitor N-terminal
GRMZM2G036262	0.630134	0.257279	normal	0.00875735	-0.907614	normal	0.0429484	-0.661114	normal	0.000298338	1.73548	up	4.25591e-06	2.06538	up	--
GRMZM2G036282	3.36336e-14	2.77813	up	2.53045e-05	-1.85979	down	0.00331467	0.870296	normal	--	--	--	3.51542e-09	2.30846	up	Domain of unknown function (DUF4228)
GRMZM2G036286	0.00337608	0.948361	normal	0.270754	0.445469	normal	1.04001e-05	1.39321	up	0.0897756	-0.693838	normal	0.555235	0.250409	normal	zinc-finger of the FCS-type, C2-C2
GRMZM2G036290	8.40714e-10	-4.13951	down	1.10175e-06	2.95665	up	--	--	--	0.0854437	1.00358	normal	--	--	--	1-deoxy-D-xylulose 5-phosphate reductoisomerase
GRMZM2G036297	0.000654822	2.07253	up	--	--	--	0.102692	1.15771	normal	--	--	--	5.86322e-10	5.24584	up	SBP domain
GRMZM2G036409	0.0341033	0.844882	normal	0.0104875	-0.757171	normal	0.82977	0.092602	normal	3.31709e-05	1.69517	up	1.53809e-10	2.58581	up	UDP-glucoronosyl and UDP-glucosyl transferase
GRMZM2G036427	1.2912e-25	-1.99715	down	1.27882e-16	-0.915425	normal	6.9904e-87	-2.93064	down	5.88293e-12	0.929248	normal	1.05785e-08	-1.07403	down	Universal stress protein family
GRMZM2G036448	4.77278e-05	0.98073	normal	0.00697559	-0.636059	normal	0.122339	0.3372	normal	6.60637e-13	-1.66171	down	0.00562951	-0.676609	normal	Transmembrane amino acid transporter protein
GRMZM2G036455	0.305382	0.553614	normal	0.886375	0.0862851	normal	0.211553	0.637052	normal	0.00238965	-1.28212	down	0.0668397	-0.728221	normal	short chain dehydrogenase
GRMZM2G036464	0.0655296	-0.394505	normal	1.26789e-22	1.59125	up	1.5587e-09	1.18307	up	1.33578e-07	0.87563	normal	0.0200195	0.486383	normal	Glutamine synthetase, catalytic domain
GRMZM2G036543	1.59839e-22	-1.44468	down	1.21474e-22	-0.957274	normal	5.13236e-86	-2.41278	down	0.489063	0.0973946	normal	4.56227e-21	-1.34344	down	Histidine biosynthesis protein
GRMZM2G036605	4.16773e-74	9.71699	up	2.09597e-51	-8.2643	down	5.3274e-16	1.55517	up	1.69951e-111	-11.2715	down	1.40262e-26	-1.57314	down	--
GRMZM2G036629	9.06349e-23	6.36487	up	--	--	--	3.9039e-21	6.22233	up	--	--	--	9.59159e-20	6.87239	up	Metallothionein
GRMZM2G036631	0.172312	-1.18263	normal	9.86963e-09	3.95199	up	--	--	--	5.14763e-35	3.52398	up	--	--	--	Heavy-metal-associated domain
GRMZM2G036634	0.0326652	-1.86015	normal	0.00412496	2.2274	up	--	--	--	0.682917	0.14658	normal	8.48495e-05	-2.70504	down	RNA recognition motif. (a.k.a. RRM, RBD, or RNP domain)
GRMZM2G036640	0.220559	-0.297244	normal	3.82992e-12	1.39214	up	4.89616e-06	1.08233	up	0.166618	-0.271392	normal	0.00980288	-0.562111	normal	Cytidine and deoxycytidylate deaminase zinc-binding region
GRMZM2G036708	3.84575e-53	3.11158	up	9.9808e-188	-2.88112	down	0.195732	0.259244	normal	1.12316e-13	1.4875	up	1.1051e-122	4.6323	up	Pyridoxal-phosphate dependent enzyme
GRMZM2G036752	0.199163	0.30801	normal	3.68115e-07	-0.83728	normal	0.00160648	-0.537973	normal	2.32114e-05	1.0389	up	1.80833e-08	1.36157	up	X8 domain
GRMZM2G036759	--	--	--	0.0303819	-1.76452	normal	6.03352e-18	-5.8119	down	1.5952e-05	-3.10009	down	1.03307e-11	-5.59441	down	Isocitrate/isopropylmalate dehydrogenase
GRMZM2G036832	0.0779805	-1.46279	normal	0.00938316	1.27129	up	--	--	--	0.20988	-0.601966	normal	0.00819109	-2.18395	down	Filamin/ABP280 repeat
GRMZM2G036861	1.01666e-07	2.07302	up	--	--	--	5.43577e-18	3.00941	up	0.678102	0.289985	normal	4.02078e-10	2.44031	up	Chorismate synthase
GRMZM2G036905	0.0171258	0.528829	normal	0.453687	-0.134611	normal	0.0299772	0.389009	normal	0.00206946	0.550761	normal	9.98763e-09	1.09249	up	--
GRMZM2G036908	1.06177e-10	1.48999	up	4.35182e-18	-1.56494	down	0.716259	-0.0744086	normal	4.5157e-35	-2.13758	down	0.000230673	-0.629289	normal	Cation efflux family
GRMZM2G036916	0.519547	0.154248	normal	2.80043e-10	1.20081	up	1.37318e-09	1.3418	up	0.124767	0.325333	normal	0.0387989	0.489094	normal	K+ potassium transporter
GRMZM2G036918	1.45961e-05	-0.920937	normal	2.18313e-19	1.54989	up	0.00334407	0.615674	normal	9.81584e-18	1.61205	up	0.00299015	0.69684	normal	Glycosyl transferase family 8
GRMZM2G036966	0.00152857	1.57745	up	--	--	--	3.00612e-16	3.6353	up	0.970686	0.0292932	normal	8.35799e-05	1.6921	up	Protein of unknown function, DUF573
GRMZM2G037015	0.0430506	1.19867	normal	--	--	--	0.00151793	1.50472	up	6.69848e-09	-2.49361	down	0.0006808	-1.26971	down	DDE superfamily endonuclease
GRMZM2G037048	5.98561e-11	-1.18106	down	1.86666e-37	1.62663	up	0.0315573	0.426445	normal	1.92826e-42	2.11007	up	4.18475e-05	0.929937	normal	--
GRMZM2G037077	--	--	--	8.83822e-38	-4.8441	down	4.58684e-05	-3.35345	down	1.58685e-31	-4.78013	down	1.71487e-05	-4.03917	down	--
GRMZM2G037104	0.173019	0.212675	normal	1.28341e-22	1.22832	up	4.87535e-29	1.43263	up	5.88433e-05	0.482175	normal	8.26282e-10	0.704235	normal	Acyltransferase C-terminus
GRMZM2G037152	0.188487	0.718814	normal	0.150273	-0.750142	normal	0.938611	-0.0498154	normal	0.00997113	-1.20975	down	0.372032	-0.480682	normal	GNS1/SUR4 family
GRMZM2G037204	9.79609e-09	0.801744	normal	0.0157602	-0.187615	normal	7.64699e-07	0.607236	normal	3.24938e-06	0.374953	normal	1.09357e-21	1.18702	up	Ras family
GRMZM2G037265	2.98542e-48	2.28948	up	3.8784e-53	-1.97454	down	0.0413484	0.312234	normal	5.98509e-29	-1.69015	down	0.000225615	0.612067	normal	Raffinose synthase or seed imbibition protein Sip1
GRMZM2G037284	0.538046	0.119269	normal	6.0064e-100	-1.72662	down	3.23156e-32	-1.60829	down	4.07687e-22	-0.945288	normal	7.78658e-08	-0.815185	normal	Transport and Golgi organisation 2
GRMZM2G037308	0.0159229	-0.422429	normal	5.25166e-38	-1.52256	down	3.59649e-48	-1.95332	down	8.85627e-05	0.680872	normal	0.20126	0.267796	normal	Protein tyrosine and serine/threonine kinase
GRMZM2G037322	0.000460239	-1.31974	down	0.890719	-0.0421691	normal	0.000103841	-1.37877	down	8.96066e-06	1.47997	up	0.789988	0.152302	normal	alpha/beta hydrolase fold
GRMZM2G037327	0.879271	0.109181	normal	0.0917318	0.880597	normal	1.05146e-13	1.09363	up	0.660072	-0.296682	normal	0.342712	-0.20638	normal	Major intrinsic protein
GRMZM2G037334	0.0118841	0.967563	normal	0.899416	0.0595756	normal	0.000232557	1.04337	up	0.620398	0.259021	normal	4.33251e-05	1.27551	up	Remorin, C-terminal region
GRMZM2G037342	8.06792e-08	-0.819422	normal	4.22304e-23	-0.731872	normal	2.9476e-31	-1.55814	down	3.02574e-06	0.467014	normal	0.0397393	-0.347151	normal	Sodium/hydrogen exchanger family
GRMZM2G037343	0.0163215	-0.832851	normal	1.46423e-07	2.12144	up	0.0117718	1.27411	normal	0.00725928	1.04167	up	0.666944	0.228251	normal	Sodium/hydrogen exchanger family
GRMZM2G037345	6.40208e-11	3.11388	up	3.67871e-27	-4.04636	down	0.00528941	-0.858088	normal	--	--	--	1.58031e-07	3.45887	up	Myb/SANT-like DNA-binding domain
GRMZM2G037379	3.38192e-06	1.20716	up	0.665657	0.169168	normal	1.10877e-07	1.37214	up	0.0057467	-1.03208	down	0.713413	0.155741	normal	Survival protein SurE
GRMZM2G037386	--	--	--	--	--	--	--	--	--	0.0600292	-1.04467	normal	0.000643988	-2.03571	down	Protein kinase domain
GRMZM2G037411	3.37544e-07	-0.953092	normal	0.0023392	-0.36104	normal	3.16401e-21	-1.32849	down	1.67188e-16	1.10065	up	0.449969	0.148712	normal	Pectinesterase
GRMZM2G037413	4.08176e-06	2.15961	up	--	--	--	0.00479972	1.16189	up	--	--	--	0.00142377	2.4077	up	Cellulose synthase
GRMZM2G037422	0.045872	0.566443	normal	0.0986027	-0.503239	normal	0.886708	0.0501611	normal	8.70873e-09	-1.47837	down	0.00065528	-0.910053	normal	Armadillo/beta-catenin-like repeat
GRMZM2G037431	0.000219912	1.05042	up	0.000311806	-0.849283	normal	0.446095	0.201066	normal	0.0057617	1.05876	up	1.32192e-10	2.14086	up	Glycosyl hydrolases family 28
GRMZM2G037452	0.823704	0.0796313	normal	2.02939e-09	1.26265	up	1.29987e-06	1.31989	up	0.159356	-0.29249	normal	0.488764	-0.202966	normal	Cysteine-rich TM module stress tolerance
GRMZM2G037472	5.15839e-35	-2.06986	down	2.33549e-64	2.50531	up	0.0432365	0.420486	normal	5.96595e-07	0.73082	normal	2.67371e-14	-1.3378	down	Kinesin motor domain
GRMZM2G037485	0.147311	0.829123	normal	--	--	--	9.58986e-06	2.79819	up	--	--	--	0.00351469	2.0118	up	--
GRMZM2G037545	--	--	--	0.000170237	-1.73193	down	3.65243e-15	-4.28275	down	--	--	--	--	--	--	UDP-glucoronosyl and UDP-glucosyl transferase
GRMZM2G037644	1.60205e-08	-1.09765	down	0.263797	0.195117	normal	2.12658e-06	-0.912321	normal	0.00292732	0.541955	normal	0.0136385	-0.550732	normal	--
GRMZM2G037650	0.255846	0.400119	normal	0.721352	0.140725	normal	0.109052	0.533177	normal	8.24391e-10	-1.57452	down	7.13671e-07	-1.17374	down	Myb-like DNA-binding domain
GRMZM2G037685	9.58146e-35	-4.08325	down	3.15574e-31	4.20972	up	--	--	--	0.0051805	0.750544	normal	2.61661e-15	-3.3297	down	--
GRMZM2G037831	8.20265e-24	-3.14143	down	2.2029e-75	6.5543	up	2.42246e-07	3.10872	up	1.49857e-23	1.80475	up	0.000849401	-1.3731	down	Sodium/calcium exchanger protein
GRMZM2G037910	5.27314e-05	-1.81798	down	0.00218357	-0.90213	normal	4.87985e-15	-2.77089	down	0.00467364	-0.929925	normal	2.74818e-13	-2.81095	down	bZIP transcription factor
GRMZM2G037926	0.183143	0.373419	normal	7.32529e-05	1.00725	up	1.40185e-09	1.37915	up	0.0182647	0.709369	normal	6.84083e-05	1.09887	up	Cyclin-dependent kinase inhibitor
GRMZM2G037941	0.627287	0.277353	normal	0.0186915	1.24438	normal	0.00616131	1.50812	up	0.451666	0.459941	normal	0.215861	0.756463	normal	Transcription factor regulating root and shoot growth via Pin3
GRMZM2G037993	2.51557e-18	5.83869	up	3.32275e-16	-5.39237	down	0.374109	0.386524	normal	--	--	--	1.15281e-08	2.76659	up	Ferric reductase NAD binding domain
GRMZM2G038024	4.1326e-31	-6.52417	down	4.43574e-31	6.13636	up	--	--	--	3.09307e-06	3.55768	up	--	--	--	--
GRMZM2G038028	--	--	--	4.78306e-20	-5.44699	down	1.58575e-10	-3.61766	down	--	--	--	--	--	--	--
GRMZM2G038073	0.435042	-0.427985	normal	1.15961e-06	2.2602	up	0.000672222	1.80728	up	0.000227983	2.1266	up	0.0121491	1.74317	normal	No apical meristem (NAM) protein
GRMZM2G038082	0.0939797	0.98185	normal	0.25903	0.796412	normal	0.00165997	1.82806	up	--	--	--	0.00291908	2.31786	up	--
GRMZM2G038108	0.113707	0.637295	normal	0.24599	0.586093	normal	0.00456197	1.22105	up	2.33303e-09	-1.87567	down	1.98928e-05	-1.24149	down	Activator of Hsp90 ATPase, N-terminal
GRMZM2G038152	0.0917929	-0.4287	normal	0.954145	-0.0150525	normal	0.0427518	-0.454693	normal	2.57654e-05	1.18779	up	0.012333	0.776298	normal	Galactose oxidase, central domain
GRMZM2G038165	0.0250468	-0.909199	normal	0.00814514	0.801376	normal	0.797561	-0.130803	normal	0.35043	-0.311258	normal	0.00282071	-1.22313	down	Protein kinase domain
GRMZM2G038170	--	--	--	5.16562e-16	-4.19407	down	1.96497e-17	-5.04426	down	--	--	--	--	--	--	Phytochelatin synthase
GRMZM2G038183	0.0716687	-0.596798	normal	0.00685296	0.723838	normal	0.788618	0.111136	normal	0.0159428	-0.527948	normal	7.53461e-05	-1.12213	down	UBA-like domain (DUF1421)
GRMZM2G038195	0.00142621	0.496038	normal	3.45431e-25	-1.10772	down	3.77568e-07	-0.618966	normal	0.0177929	-0.343846	normal	0.324777	0.161298	normal	Calcineurin-like phosphoesterase
GRMZM2G038224	--	--	--	2.02908e-20	-5.89217	down	2.49043e-19	-5.98824	down	--	--	--	--	--	--	NmrA-like family
GRMZM2G038281	4.81702e-09	0.804707	normal	1.77389e-103	-1.46156	down	5.30086e-09	-0.659615	normal	1.55476e-18	-0.626812	normal	0.146202	0.190648	normal	Glycosyl hydrolases family 35
GRMZM2G038284	0.000273402	0.620707	normal	7.33018e-42	-1.18325	down	7.25292e-05	-0.565177	normal	8.45453e-58	-1.54736	down	1.59781e-09	-0.912289	normal	Stress-induced protein Di19, C-terminal
GRMZM2G038301	1.09168e-07	1.0425	up	0.108141	-0.321666	normal	9.02136e-05	0.713456	normal	0.754912	-0.0927005	normal	1.69438e-05	0.958843	normal	ResB-like family
GRMZM2G038365	5.44896e-37	3.57381	up	0.164237	-0.653577	normal	3.87832e-24	2.87577	up	0.892648	0.0975161	normal	1.27319e-30	3.70302	up	Rieske [2Fe-2S] domain
GRMZM2G038388	2.46142e-26	-6.66488	down	0.00378051	0.87419	normal	1.40333e-18	-5.89371	down	3.83343e-10	2.76582	up	--	--	--	NB-ARC domain
GRMZM2G038394	0.00775899	-0.632168	normal	8.91336e-13	1.32396	up	0.00487523	0.675534	normal	1.42149e-14	1.56652	up	0.000232542	0.939086	normal	EF-hand domain pair
GRMZM2G038485	2.63315e-06	-1.39213	down	7.05103e-07	1.54325	up	0.743439	0.15365	normal	0.00719093	0.813346	normal	0.128888	-0.573643	normal	Cyclin-dependent kinase regulatory subunit
GRMZM2G038492	0.145704	-1.28719	normal	3.9945e-22	5.41162	up	--	--	--	0.00647035	1.17747	up	--	--	--	Eukaryotic glutathione synthase, ATP binding domain
GRMZM2G038519	0.00153863	-1.55863	down	1.89969e-07	2.25696	up	--	--	--	0.137076	0.677909	normal	0.122259	-0.902014	normal	Chlorophyll A-B binding protein
GRMZM2G038536	3.10532e-74	-2.41298	down	4.46142e-271	2.0707	up	0.00391115	-0.364024	normal	2.13687e-15	-0.46276	normal	2.01443e-132	-2.87393	down	Poly(ADP-ribose) polymerase catalytic domain
GRMZM2G038588	0.260235	-0.238249	normal	1.2541e-25	1.45765	up	3.11279e-10	1.20233	up	1.54491e-05	0.681529	normal	0.0411632	0.450227	normal	mRNA cleavage and polyadenylation factor CLP1 P-loop
GRMZM2G038636	0.818461	-0.0457589	normal	0.17685	-0.149883	normal	0.192947	-0.204353	normal	1.10723e-34	1.67245	up	1.20396e-21	1.63353	up	Papain family cysteine protease
GRMZM2G038640	0.527851	-0.241617	normal	3.6403e-15	2.37126	up	6.48064e-09	2.09679	up	1.33423e-05	1.3137	up	0.00331083	1.07927	up	--
GRMZM2G038669	--	--	--	--	--	--	--	--	--	1.42927e-06	-2.5716	down	3.42083e-11	-3.72839	down	D-mannose binding lectin
GRMZM2G038677	0.00185239	1.00675	up	0.466015	0.360011	normal	0.000624547	1.34692	up	0.0837952	0.928372	normal	2.36737e-06	1.98094	up	PCO_ADO
GRMZM2G038783	0.932143	0.0352972	normal	0.000820149	0.9921	normal	0.000240624	1.02536	up	0.083417	-0.514941	normal	0.101717	-0.477374	normal	CCT motif
GRMZM2G038801	0.0099665	1.07776	up	0.887343	-0.0774354	normal	0.0127501	0.995849	normal	0.630454	0.289147	normal	0.00030797	1.41915	up	--
GRMZM2G038821	4.57412e-06	0.606253	normal	1.73787e-74	-1.41527	down	4.65295e-16	-0.814559	normal	8.25778e-12	-0.544729	normal	0.559653	0.0729757	normal	Thiamine pyrophosphate enzyme, N-terminal TPP binding domain
GRMZM2G038855	0.0755926	0.546598	normal	0.0185476	0.751391	normal	7.47521e-08	1.30689	up	0.816503	0.10505	normal	0.0566716	0.66404	normal	GDSL/SGNH-like Acyl-Esterase family found in Pmr5 and Cas1p
GRMZM2G038926	0.0470931	1.07814	normal	--	--	--	0.000178639	1.96339	up	--	--	--	0.160252	1.08437	normal	--
GRMZM2G038931	9.93805e-26	-1.46989	down	0	3.80717	up	4.4717e-47	2.30823	up	1.38396e-193	3.28694	up	2.91472e-24	1.81165	up	Protein of unknown function, DUF599
GRMZM2G038964	1.92063e-07	1.06013	up	0.00309714	0.498855	normal	4.70839e-14	1.54678	up	0.0976422	0.294849	normal	8.56074e-12	1.36844	up	Fatty acid hydroxylase superfamily
GRMZM2G038973	1.04045e-40	4.26595	up	--	--	--	4.93694e-36	7.50337	up	1.98429e-24	-3.69938	down	0.0175403	0.549515	normal	Glycosyl hydrolases family 38 C-terminal domain
GRMZM2G039009	1.06712e-18	-5.28379	down	0.00384686	1.04844	up	5.93229e-10	-4.17257	down	0.00184048	1.55619	up	--	--	--	SAM dependent carboxyl methyltransferase
GRMZM2G039017	1.66347e-22	6.40052	up	--	--	--	4.04737e-05	1.88171	up	--	--	--	3.56487e-08	2.76744	up	--
GRMZM2G039089	0.757748	0.0985108	normal	0.00248677	0.589913	normal	0.0150608	0.672685	normal	5.91821e-12	1.29152	up	7.30528e-08	1.39225	up	--
GRMZM2G039094	0.36284	0.339286	normal	3.29044e-16	-1.93296	down	6.40056e-14	-1.60909	down	0.00932225	-0.908806	normal	0.0860034	-0.573446	normal	MATH domain
GRMZM2G039166	0.016801	-0.496758	normal	8.28819e-80	1.49812	up	7.18559e-08	0.976672	normal	0.941091	-0.00817018	normal	0.00811628	-0.500215	normal	Homocysteine S-methyltransferase
GRMZM2G039186	0.00150677	-0.636189	normal	0.244607	0.192737	normal	0.00584213	-0.455021	normal	0.000137521	-0.551943	normal	9.80182e-16	-1.18512	down	Calcium-dependent channel, 7TM region, putative phosphate
GRMZM2G039212	2.6907e-11	4.52099	up	--	--	--	6.25653e-05	2.15958	up	--	--	--	0.000122086	2.35024	up	--
GRMZM2G039214	0.00245203	0.492789	normal	2.41701e-24	1.62721	up	1.46405e-42	2.11325	up	0.657294	0.0942396	normal	0.00135388	0.595476	normal	Serine aminopeptidase, S33
GRMZM2G039345	--	--	--	5.44427e-07	-2.8316	down	0.0114093	-1.22547	normal	--	--	--	--	--	--	--
GRMZM2G039365	5.77136e-14	1.25617	up	3.71125e-26	-1.48515	down	0.0705327	-0.235642	normal	1.50772e-07	-0.953881	normal	0.0802109	0.310623	normal	--
GRMZM2G039443	--	--	--	--	--	--	--	--	--	8.52523e-94	-7.83713	down	8.60514e-92	-7.54532	down	--
GRMZM2G039538	1.93662e-42	-7.98862	down	1.33356e-08	-1.24266	down	8.53979e-62	-9.22529	down	0.19149	0.334009	normal	6.4635e-34	-8.29848	down	Subtilase family
GRMZM2G039577	0.302587	-0.531675	normal	0.93086	-0.039863	normal	0.0963345	-0.601224	normal	0.176281	-0.577267	normal	0.00142792	-1.14009	down	von Willebrand factor type A domain
GRMZM2G039639	5.97571e-17	-5.2838	down	0.198433	0.535902	normal	2.86428e-13	-4.80915	down	9.08856e-09	2.89149	up	--	--	--	Thaumatin family
GRMZM2G039648	--	--	--	3.66529e-12	-4.79738	down	6.88049e-12	-4.93772	down	--	--	--	--	--	--	--
GRMZM2G039792	1.97042e-07	-1.36957	down	1.75509e-244	3.5767	up	3.45592e-15	2.11489	up	2.28539e-46	1.26596	up	0.688719	-0.12635	normal	Lipase 3 N-terminal region
GRMZM2G039797	0.0323293	-0.418703	normal	2.01787e-23	1.86748	up	2.00458e-10	1.43649	up	0.222579	0.25805	normal	0.574452	-0.151009	normal	--
GRMZM2G039811	5.77925e-05	-0.764188	normal	1.5405e-11	0.851012	normal	0.758627	0.0724043	normal	3.91905e-11	-0.721835	normal	3.86152e-18	-1.47891	down	Endomembrane protein 70
GRMZM2G039841	8.78675e-05	-0.956076	normal	8.87258e-11	1.43082	up	0.0838244	0.463522	normal	0.00304379	0.718405	normal	0.446794	-0.232892	normal	--
GRMZM2G039845	0.059835	0.705407	normal	0.171773	0.505102	normal	8.6749e-07	1.23022	up	0.479451	-0.279274	normal	0.0878334	0.446316	normal	Major intrinsic protein
GRMZM2G039855	0.89097	-0.0382779	normal	0.58698	-0.118428	normal	0.465911	-0.165294	normal	4.29558e-12	1.50401	up	1.19459e-11	1.48226	up	--
GRMZM2G039886	1.71031e-10	1.12931	up	1.79083e-24	-1.16205	down	0.850828	-0.0346108	normal	5.9322e-26	-1.28251	down	0.446689	-0.138091	normal	DnaJ C terminal domain
GRMZM2G039900	1.34244e-13	1.20504	up	3.63343e-08	-0.898844	normal	0.0524618	0.2971	normal	0.000296927	-0.708226	normal	0.00382128	0.503903	normal	Ras family
GRMZM2G039906	2.22926e-14	1.22246	up	6.0983e-28	-1.1074	down	0.518968	0.112472	normal	6.34817e-09	-0.652172	normal	0.000207439	0.583925	normal	LEM3 (ligand-effect modulator 3) family / CDC50 family
GRMZM2G039934	0.0286304	1.13121	normal	--	--	--	0.08232	1.05778	normal	0.00736436	-1.42217	down	0.515801	-0.31525	normal	Protein kinase domain
GRMZM2G039948	--	--	--	2.20408e-19	-5.77702	down	5.8402e-10	-2.75387	down	7.59198e-17	-5.72873	down	2.2274e-07	-2.70231	down	--
GRMZM2G039978	0.214526	0.726632	normal	--	--	--	3.0067e-06	3.31294	up	0.82203	-0.176197	normal	0.385402	0.561725	normal	Domain of unknown function (DUF588)
GRMZM2G039983	0.0365336	0.886129	normal	0.712708	0.197191	normal	0.00254812	1.09611	up	0.232361	-0.5959	normal	0.473746	0.298075	normal	Targeting protein for Xklp2 (TPX2) domain
GRMZM2G039988	--	--	--	1.18311e-07	-3.06022	down	0.00461437	-1.4008	down	--	--	--	--	--	--	--
GRMZM2G040017	0.345359	-0.155445	normal	4.46937e-23	-0.857242	normal	1.86536e-17	-1.01949	down	0.743676	-0.0474096	normal	0.234901	-0.194732	normal	Sodium/calcium exchanger protein
GRMZM2G040030	0.031684	-0.409479	normal	0.000554361	0.489467	normal	0.755131	0.0695443	normal	8.45618e-10	-0.815432	normal	7.43132e-12	-1.21631	down	Cold acclimation protein WCOR413
GRMZM2G040039	2.03242e-05	1.88691	up	4.70504e-06	-1.94596	down	0.861936	-0.0752539	normal	--	--	--	6.13421e-12	4.51172	up	Eukaryotic glutathione synthase, ATP binding domain
GRMZM2G040052	0.0094492	1.60017	up	--	--	--	0.000393408	2.36798	up	--	--	--	2.14209e-12	5.72709	up	MA3 domain
GRMZM2G040069	1.08775e-05	1.22609	up	7.81777e-06	-0.74457	normal	0.0722439	0.48789	normal	8.7347e-12	-1.24038	down	0.968053	0.0142795	normal	DSS1/SEM1 family
GRMZM2G040095	1.04116e-17	1.7934	up	1.9433e-07	-1.21422	down	0.00410086	0.565971	normal	0.0131041	0.908042	normal	1.17124e-27	2.73717	up	Lipoxygenase
GRMZM2G040102	1.80451e-06	0.980225	normal	2.21418e-29	-1.28476	down	0.0984093	-0.30168	normal	0.372097	-0.157806	normal	1.37264e-05	0.837351	normal	--
GRMZM2G040300	2.31416e-08	1.59247	up	4.16585e-05	-1.19228	down	0.237852	0.386882	normal	0.831551	0.11392	normal	6.31851e-06	1.70699	up	Haloacid dehalogenase-like hydrolase
GRMZM2G040309	0.074998	-0.768498	normal	0.304455	-0.40365	normal	0.003949	-1.17856	down	2.25589e-06	-1.52722	down	1.00433e-10	-2.31407	down	CRT-like, chloroquine-resistance transporter-like
GRMZM2G040326	0.17608	0.204069	normal	0.033812	-0.326452	normal	0.503925	-0.130846	normal	3.10422e-05	0.831813	normal	3.5291e-06	1.04376	up	Prolyl oligopeptidase family
GRMZM2G040359	1.17141e-05	3.21058	up	--	--	--	4.62216e-14	5.28577	up	--	--	--	2.45055e-13	5.89853	up	GDSL-like Lipase/Acylhydrolase
GRMZM2G040382	0.000100988	0.621146	normal	0.0204389	-0.320133	normal	0.0500119	0.293671	normal	0.0157374	0.483308	normal	5.80933e-08	1.11329	up	CUE domain
GRMZM2G040467	0.808687	0.0743547	normal	0.000226464	1.03359	up	6.60379e-05	1.10318	up	0.898732	-0.0439219	normal	0.908453	0.0378991	normal	--
GRMZM2G040493	0.0353104	-0.479143	normal	0.0284804	-0.425853	normal	1.8176e-05	-0.913568	normal	1.36486e-06	-0.890486	normal	2.19456e-11	-1.36503	down	--
GRMZM2G040513	1.38396e-13	1.63913	up	8.436e-29	-1.78516	down	0.488758	-0.14094	normal	0.751836	0.096404	normal	4.13157e-18	1.759	up	Tetratricopeptide repeat
GRMZM2G040515	0.0133236	0.425191	normal	1.3992e-65	-1.70116	down	2.70511e-24	-1.28021	down	2.17321e-69	-1.80311	down	4.6658e-26	-1.36609	down	Pyroglutamyl peptidase
GRMZM2G040517	0.413575	-0.241203	normal	0.0759139	-0.37824	normal	0.000194894	-0.634788	normal	3.21987e-20	2.71042	up	2.90742e-17	2.50471	up	Pollen protein Ole e 1 like
GRMZM2G040559	0.1109	-0.485429	normal	0.00136689	0.800749	normal	0.319591	0.302632	normal	2.63934e-05	1.29565	up	0.0232835	0.825059	normal	--
GRMZM2G040689	4.52442e-34	2.41866	up	5.66413e-84	-2.69736	down	0.111319	-0.269133	normal	0.0330347	-0.579421	normal	3.61448e-18	1.84971	up	Hydrophobic seed protein
GRMZM2G040692	4.80262e-32	7.13427	up	2.91099e-33	-7.04921	down	0.969956	-0.0103976	normal	--	--	--	1.80561e-11	2.30288	up	--
GRMZM2G040728	2.44117e-05	-2.36221	down	8.38373e-07	2.67117	up	--	--	--	0.676523	0.217582	normal	0.000520851	-2.20196	down	Cytochrome P450
GRMZM2G040736	0.547807	0.353791	normal	--	--	--	0.00186415	1.74677	up	--	--	--	0.000112486	2.56266	up	Response regulator receiver domain
GRMZM2G040762	2.05056e-05	-0.74882	normal	7.9228e-07	-0.362503	normal	1.52138e-12	-1.11877	down	1.99925e-07	0.380682	normal	0.033517	-0.364792	normal	Ribonuclease III domain
GRMZM2G040803	0.000608765	-0.611595	normal	0.000135565	-0.495334	normal	1.37201e-14	-1.11729	down	0.774056	-0.0559195	normal	0.000159483	-0.661242	normal	Zinc finger, C3HC4 type (RING finger)
GRMZM2G040833	0.00380045	2.18766	up	--	--	--	7.76374e-11	4.75114	up	--	--	--	4.10484e-06	3.68999	up	GDSL/SGNH-like Acyl-Esterase family found in Pmr5 and Cas1p
GRMZM2G040838	0.192303	-0.949751	normal	0.1497	0.878009	normal	--	--	--	0.094109	-0.816824	normal	0.00357701	-1.83067	down	--
GRMZM2G040858	8.2461e-05	-1.52164	down	1.55749e-06	2.2856	up	0.265149	0.766416	normal	5.36343e-06	1.73656	up	0.726453	0.217645	normal	--
GRMZM2G040876	9.97284e-09	1.01625	up	0.313988	0.180889	normal	8.27248e-14	1.19058	up	0.00120795	-0.53182	normal	0.00336206	0.496639	normal	Oligosaccharyl transferase STT3 subunit
GRMZM2G040878	0.820398	-0.125402	normal	0.00172188	1.27328	up	0.0205228	1.11741	normal	0.0749992	0.754165	normal	0.201066	0.636335	normal	PAP_fibrillin
GRMZM2G040890	1.17236e-10	-1.23021	down	9.76861e-71	3.27367	up	5.98619e-24	2.03333	up	1.59882e-53	3.44529	up	2.19299e-15	2.22903	up	--
GRMZM2G040902	0.637763	-0.0998365	normal	0.521586	-0.111443	normal	0.193508	-0.220108	normal	3.13744e-12	1.30157	up	5.99303e-11	1.21559	up	SNARE-complex protein Syntaxin-18 N-terminus
GRMZM2G040933	0.930807	0.0239535	normal	1.11326e-05	1.04599	up	4.38167e-05	1.05825	up	0.760923	-0.0759667	normal	0.86324	-0.0441046	normal	Sodium:sulfate symporter transmembrane region
GRMZM2G040947	0.141989	0.444348	normal	4.41264e-05	-1.07317	down	0.0139744	-0.641689	normal	9.54404e-08	-1.36263	down	0.00010937	-0.918072	normal	PPR repeat family
GRMZM2G040964	0.00046855	0.660128	normal	5.39361e-28	-1.3688	down	2.4751e-06	-0.71285	normal	0.260436	0.234868	normal	1.75149e-06	0.906762	normal	Protein kinase domain
GRMZM2G040965	0.0138778	0.504604	normal	0.397789	0.190136	normal	0.000585315	0.685932	normal	0.000276002	0.900546	normal	1.53539e-10	1.4214	up	Formin Homology 2 Domain
GRMZM2G040975	0.876406	0.0572014	normal	0.415691	-0.17341	normal	0.656044	-0.123681	normal	1.41164e-13	2.00548	up	2.02639e-11	2.07561	up	--
GRMZM2G041015	0.00505638	-0.390436	normal	0.762772	0.0285377	normal	0.00179994	-0.371531	normal	3.51023e-91	1.76404	up	3.61957e-28	1.37949	up	--
GRMZM2G041039	--	--	--	--	--	--	--	--	--	0.0312616	-1.04365	normal	1.88621e-09	-2.91042	down	--
GRMZM2G041065	3.13019e-24	-1.584	down	1.26782e-07	-0.527995	normal	8.4275e-90	-2.12966	down	4.59401e-05	-0.443932	normal	4.73994e-62	-2.02907	down	Inorganic H+ pyrophosphatase
GRMZM2G041125	0.471223	0.248114	normal	0.4695	0.202493	normal	0.118761	0.44358	normal	2.64202e-06	-1.04439	down	0.00204554	-0.78567	normal	Protein kinase domain
GRMZM2G041127	0.425529	-0.242842	normal	4.21337e-17	2.62278	up	3.67587e-11	2.35699	up	0.875697	0.0483051	normal	0.536338	-0.188976	normal	Homeobox associated leucine zipper
GRMZM2G041171	0.567087	0.264291	normal	0.921768	-0.0281336	normal	0.591857	0.230926	normal	2.70363e-11	2.6698	up	2.48538e-09	2.92783	up	Plant transposase (Ptta/En/Spm family)
GRMZM2G041175	6.89477e-38	-2.07982	down	3.35524e-82	2.39457	up	0.129809	0.295955	normal	1.36571e-18	1.17475	up	1.26992e-06	-0.902634	normal	Tetraspanin family
GRMZM2G041223	0.868308	-0.0438289	normal	0.186167	0.215495	normal	0.480465	0.160495	normal	1.25708e-25	-1.26784	down	7.56001e-14	-1.30032	down	WRC
GRMZM2G041238	0.31731	0.386282	normal	0.127992	0.736881	normal	5.66334e-09	1.1853	up	0.867133	-0.0998446	normal	0.155782	0.297778	normal	Ribosomal proteins L26 eukaryotic, L24P archaeal
GRMZM2G041269	0.00365065	-1.22164	down	0.0139952	-0.64831	normal	8.87566e-10	-1.90547	down	0.649429	0.163644	normal	0.0034952	-1.08698	down	Protein of unknown function (DUF1644)
GRMZM2G041310	1.44275e-139	-4.06119	down	1.74844e-148	3.20105	up	0.00126986	-0.866796	normal	2.88556e-109	2.75006	up	7.18022e-07	-1.30701	down	--
GRMZM2G041312	1.16824e-25	1.28443	up	0.000106283	-0.438644	normal	9.61357e-14	0.8383	normal	0.935711	-0.0145758	normal	2.04021e-25	1.28066	up	Glycogen recognition site of AMP-activated protein kinase
GRMZM2G041356	0.117971	-0.643946	normal	0.0327984	0.903225	normal	0.605777	0.262027	normal	0.00529601	-0.982739	normal	4.59671e-06	-1.64122	down	Aldose 1-epimerase
GRMZM2G041381	0.190369	0.389047	normal	0.000665437	0.769432	normal	3.01721e-05	1.14144	up	0.198526	-0.261814	normal	0.612851	0.139851	normal	C-terminus of histone H2A
GRMZM2G041415	0.0258645	0.842932	normal	0.000102962	-1.16112	down	0.159152	-0.324633	normal	0.555502	-0.266951	normal	0.0717442	0.594562	normal	Myb-like DNA-binding domain
GRMZM2G041454	0.000557298	1.07869	up	0.131489	0.650844	normal	8.33639e-07	1.72298	up	0.000192816	-1.17306	down	0.799108	-0.0884591	normal	Lysine methyltransferase
GRMZM2G041462	0.189742	0.505009	normal	0.373763	0.332117	normal	0.000470654	0.848745	normal	0.222553	0.550107	normal	0.00299905	1.08326	up	Homeodomain
GRMZM2G041506	0.012627	-1.10831	normal	0.872503	0.060425	normal	0.0169	-1.05933	normal	0.000572427	2.00543	up	0.247352	0.947498	normal	Protein of unknown function (DUF632)
GRMZM2G041518	0.00590645	0.698661	normal	0.56867	-0.177585	normal	0.0663612	0.509566	normal	1.82626e-08	-1.23446	down	0.0151997	-0.528724	normal	Protein tyrosine and serine/threonine kinase
GRMZM2G041668	0.520286	0.310301	normal	0.0151353	1.22759	normal	0.00108146	1.55068	up	0.922592	0.0585236	normal	0.434282	0.383742	normal	No apical meristem (NAM) protein
GRMZM2G041694	1.9858e-05	2.14497	up	--	--	--	1.20944e-14	5.36963	up	--	--	--	7.44626e-09	4.25008	up	Enoyl-(Acyl carrier protein) reductase
GRMZM2G041699	--	--	--	--	--	--	--	--	--	0.000178186	-1.66583	down	1.05911e-13	-3.95663	down	UDP-glucoronosyl and UDP-glucosyl transferase
GRMZM2G041714	0.00451201	0.852811	normal	9.61888e-07	-1.21378	down	0.125184	-0.368392	normal	0.000577525	-0.966709	normal	0.717911	-0.105582	normal	Hypoxia induced protein conserved region
GRMZM2G041729	0.4269	0.292954	normal	3.21679e-38	-2.50769	down	5.42011e-34	-2.22636	down	0.10092	-0.60788	normal	0.400864	-0.314619	normal	EF hand
GRMZM2G041732	0.329472	-0.244559	normal	4.95822e-14	1.1388	up	0.000149069	0.874039	normal	0.576157	-0.0945935	normal	0.152538	-0.33209	normal	DEAD/DEAH box helicase
GRMZM2G041765	6.62267e-05	0.573147	normal	0.274446	0.184742	normal	2.73335e-06	0.748575	normal	0.0108266	0.417161	normal	5.40658e-11	1.00063	up	--
GRMZM2G041770	0.00775326	-0.59522	normal	7.35325e-06	-0.505396	normal	7.30883e-09	-1.10643	down	0.754077	0.0508393	normal	0.0114873	-0.539542	normal	Zein-binding
GRMZM2G041818	0.00671172	-0.648597	normal	0.168892	0.284325	normal	0.0687226	-0.376607	normal	9.24819e-06	1.02403	up	0.155729	0.384471	normal	Protein of unknown function, DUF573
GRMZM2G041930	3.67879e-05	1.06648	up	1.26575e-10	-1.39081	down	0.163416	-0.328706	normal	8.24061e-59	-2.82127	down	3.32085e-20	-1.73591	down	--
GRMZM2G041955	0.967319	0.0239696	normal	0.825491	0.111566	normal	0.790803	0.129208	normal	0.00292229	-1.20964	down	0.00330118	-1.19827	down	PPR repeat
GRMZM2G041959	2.62002e-14	-1.50229	down	2.22595e-10	0.905656	normal	0.00706459	-0.610422	normal	5.53621e-09	0.967923	normal	0.0413297	-0.53022	normal	Kelch motif
GRMZM2G042006	0.00129016	0.664679	normal	0.00657909	0.794055	normal	1.01313e-07	1.44612	up	0.0618457	-0.495662	normal	0.540528	0.173789	normal	double strand RNA binding domain from DEAD END PROTEIN 1
GRMZM2G042027	0.0229797	0.783607	normal	2.3002e-23	-2.16702	down	6.11975e-10	-1.37984	down	3.51064e-06	-1.22738	down	0.111843	-0.429581	normal	Mitochondrial carrier protein
GRMZM2G042040	7.31286e-11	1.01155	up	2.27369e-08	-0.712283	normal	0.0495855	0.292624	normal	0.131062	-0.253731	normal	1.07414e-06	0.768764	normal	MAPEG family
GRMZM2G042061	0.0747242	-0.798077	normal	0.010259	1.06484	normal	0.538964	0.265373	normal	1.136e-05	2.06505	up	0.00827335	1.32524	up	Ribosomal L28 family
GRMZM2G042080	4.84396e-14	1.85514	up	1.38318e-21	-2.14483	down	0.140795	-0.297659	normal	0.550874	0.291094	normal	7.81445e-15	2.17163	up	Iron/manganese superoxide dismutases, C-terminal domain
GRMZM2G042084	0.0114873	0.614481	normal	0.043052	-0.481402	normal	0.615555	0.124162	normal	8.26244e-06	-1.01909	down	0.0842776	-0.398414	normal	Leucine-zipper of ternary complex factor MIP1
GRMZM2G042101	0.828652	-0.125267	normal	0.00227312	1.47301	up	0.0106607	1.33727	normal	0.404454	-0.3935	normal	0.289374	-0.519628	normal	Helix-loop-helix DNA-binding domain
GRMZM2G042133	0.00520618	0.410936	normal	5.68577e-07	0.527644	normal	1.86509e-10	0.927655	normal	2.50121e-180	4.01908	up	3.25379e-139	4.43472	up	DnaJ C terminal domain
GRMZM2G042146	5.69444e-49	-1.42252	down	8.5709e-71	-1.00898	down	2.99514e-179	-2.44024	down	2.59235e-12	0.462236	normal	4.06714e-22	-0.954061	normal	Mitochondrial carrier protein
GRMZM2G042164	1.09859e-07	1.46605	up	0.607489	-0.153437	normal	1.14928e-06	1.3074	up	2.8607e-08	-1.35222	down	0.695973	0.132811	normal	Signal peptidase, peptidase S26
GRMZM2G042171	2.10471e-17	-1.22995	down	0.698076	-0.0502572	normal	1.01083e-21	-1.29027	down	0.00490228	-0.348762	normal	1.19535e-26	-1.57242	down	Sulfate permease family
GRMZM2G042179	0.624944	-0.112928	normal	6.70651e-10	1.08558	up	2.19506e-07	0.963856	normal	2.03036e-06	-0.715851	normal	4.15032e-07	-0.821518	normal	GDP-mannose 4,6 dehydratase
GRMZM2G042195	8.14026e-30	-1.4043	down	2.70715e-08	0.518855	normal	1.05645e-12	-0.895415	normal	3.04609e-42	1.5615	up	0.385402	0.163432	normal	RNA recognition motif. (a.k.a. RRM, RBD, or RNP domain)
GRMZM2G042198	0.00126024	-0.820988	normal	0.00389211	-0.499303	normal	1.21943e-09	-1.33006	down	0.0700041	0.422086	normal	0.185069	-0.393748	normal	CCT motif
GRMZM2G042250	0.659257	-0.0952854	normal	0.0413815	0.330813	normal	0.198513	0.226364	normal	6.17231e-10	1.15355	up	5.40131e-08	1.0707	up	START domain
GRMZM2G042253	0.000679809	-0.868048	normal	1.52278e-15	2.02548	up	0.000877305	1.1368	up	0.318695	0.260536	normal	0.0512845	-0.599987	normal	TCP-1/cpn60 chaperonin family
GRMZM2G042323	0.909303	-0.033273	normal	9.2902e-246	4.42966	up	2.00571e-84	4.33061	up	1.49008e-52	1.57407	up	5.90446e-14	1.53841	up	--
GRMZM2G042442	0.00761998	0.72641	normal	0.721382	0.0886189	normal	0.00196683	0.806638	normal	0.136157	0.469664	normal	0.000168482	1.20652	up	Ubiquitin-binding WIYLD domain
GRMZM2G042492	0.0142289	0.677633	normal	0.000135742	-0.994317	normal	0.239388	-0.328553	normal	0.376124	0.32473	normal	0.000339454	1.01868	up	Ribosomal protein L34
GRMZM2G042506	--	--	--	--	--	--	--	--	--	3.45739e-69	-9.5096	down	7.25592e-60	-4.47948	down	GDSL/SGNH-like Acyl-Esterase family found in Pmr5 and Cas1p
GRMZM2G042548	2.83724e-49	-8.3549	down	9.56344e-50	8.14051	up	--	--	--	4.22462e-37	2.67305	up	5.41077e-16	-6.30238	down	No apical meristem-associated C-terminal domain
GRMZM2G042552	0.00426268	-0.445636	normal	2.82529e-08	0.683086	normal	0.185686	0.226756	normal	3.31556e-20	1.3235	up	9.15645e-07	0.886135	normal	Snf7
GRMZM2G042582	0.15316	0.215644	normal	3.6097e-63	-1.29171	down	5.83093e-23	-1.08221	down	4.08153e-06	0.533165	normal	8.7367e-08	0.757091	normal	Thioredoxin
GRMZM2G042593	0.970055	0.00880754	normal	4.03905e-25	-1.11676	down	9.6633e-16	-1.11453	down	3.06854e-22	-1.16991	down	3.32294e-14	-1.15213	down	--
GRMZM2G042599	0.615489	-0.139591	normal	4.43724e-12	2.41411	up	9.64428e-09	2.25743	up	4.50901e-06	1.28844	up	8.85126e-05	1.16625	up	Adenosine-deaminase (editase) domain
GRMZM2G042612	3.89943e-12	4.64757	up	--	--	--	0.0116434	1.24694	normal	--	--	--	0.00964509	1.38368	up	--
GRMZM2G042615	9.1781e-09	0.772518	normal	0.000524603	-0.433815	normal	0.0191112	0.329568	normal	9.21805e-27	-1.22983	down	0.00110228	-0.448211	normal	RNA recognition motif. (a.k.a. RRM, RBD, or RNP domain)
GRMZM2G042639	2.78286e-18	-2.02975	down	4.82464e-18	2.05619	up	0.952687	0.0271455	normal	0.0072164	0.522229	normal	2.38943e-08	-1.50699	down	Glutathione S-transferase, N-terminal domain
GRMZM2G042666	0.401374	0.327127	normal	3.64762e-06	1.5878	up	1.26487e-08	1.91515	up	0.2611	0.432207	normal	0.031286	0.77551	normal	Zinc-finger double-stranded RNA-binding
GRMZM2G042692	0.16415	-0.316636	normal	0.00434002	-0.357856	normal	1.03944e-06	-0.686331	normal	4.03836e-05	-0.820254	normal	1.58765e-15	-1.14007	down	Heavy-metal-associated domain
GRMZM2G042704	8.92568e-09	-0.748373	normal	7.08426e-18	0.978848	normal	0.148957	0.221132	normal	1.02784e-25	1.20453	up	0.00169947	0.464014	normal	MATH domain
GRMZM2G042752	0.864766	0.0969756	normal	7.84126e-13	4.88147	up	1.60347e-12	5.04795	up	0.390715	-0.416134	normal	0.554829	-0.314769	normal	F-box domain
GRMZM2G042754	0.0149544	-1.17417	normal	0.209866	0.343517	normal	0.0846807	-0.85648	normal	0.000688663	1.26195	up	0.941986	0.0545035	normal	--
GRMZM2G042758	6.55862e-26	3.57884	up	2.13177e-08	-2.32973	down	4.81495e-07	1.19957	up	--	--	--	3.811e-20	2.73564	up	GDSL-like Lipase/Acylhydrolase
GRMZM2G042782	0.000355651	1.06317	up	0.736791	-0.111481	normal	0.000701772	0.946898	normal	0.966062	0.0191803	normal	0.00104421	1.09583	up	Domain of unknown function (DUF4205)
GRMZM2G042797	0.567106	-0.195296	normal	0.0154141	0.736606	normal	0.0792344	0.536892	normal	1.37703e-07	2.14303	up	3.53839e-06	1.99307	up	Peptide N-acetyl-beta-D-glucosaminyl asparaginase amidase A
GRMZM2G042806	2.99173e-14	-1.10593	down	5.72912e-08	0.592671	normal	0.000867879	-0.524477	normal	2.44097e-16	0.992821	normal	0.594054	-0.107781	normal	Agenet domain
GRMZM2G042807	0.000152699	-0.631979	normal	2.60021e-14	1.01314	up	0.0426265	0.368616	normal	2.40233e-06	0.619914	normal	0.977334	-0.00628145	normal	PRP38 family
GRMZM2G042855	2.22744e-24	6.46884	up	--	--	--	1.75728e-22	6.31407	up	1.69555e-32	-7.27382	down	0.00488093	-0.807844	normal	--
GRMZM2G042881	4.47822e-31	1.59284	up	6.92024e-06	-0.646536	normal	9.02752e-15	0.938558	normal	0.86332	-0.0414877	normal	5.91943e-26	1.56198	up	Eukaryotic protein of unknown function (DUF872)
GRMZM2G042893	0.00359942	0.717334	normal	1.66064e-06	1.32347	up	9.16223e-18	2.04512	up	7.34067e-18	3.25892	up	1.12473e-28	4.04113	up	Helix-loop-helix DNA-binding domain
GRMZM2G042920	0.248211	-0.222106	normal	2.97158e-21	1.19446	up	1.33327e-08	0.958984	normal	0.00176308	0.451954	normal	0.24623	0.237474	normal	Helix-loop-helix DNA-binding domain
GRMZM2G042933	1.34272e-06	0.88052	normal	2.79866e-60	-1.73726	down	4.16687e-08	-0.855412	normal	4.85672e-32	2.86803	up	4.39068e-51	3.76801	up	Transmembrane amino acid transporter protein
GRMZM2G042995	1.09696e-29	3.20624	up	1.09005e-13	-2.41799	down	0.0002907	0.758915	normal	2.09748e-25	-3.33266	down	0.63711	-0.148782	normal	--
GRMZM2G043056	3.74319e-08	-1.30798	down	0.00404007	-0.238659	normal	2.13915e-12	-1.55556	down	0.0185642	0.252517	normal	7.17001e-06	-1.05909	down	Putative GTPase activating protein for Arf
GRMZM2G043109	0.00457642	-1.25873	down	0.000492984	1.70643	up	--	--	--	1.49258e-05	-1.37235	down	1.01729e-16	-2.69035	down	Rubrerythrin
GRMZM2G043127	0.0730518	-0.269208	normal	2.31694e-31	-0.881126	normal	6.7561e-21	-1.15659	down	0.336954	0.100833	normal	0.300192	-0.161065	normal	--
GRMZM2G043174	0.000397652	0.92538	normal	0.276267	-0.306561	normal	0.0184427	0.610179	normal	0.0447788	0.75507	normal	1.3074e-07	1.69937	up	SpoU rRNA Methylase family
GRMZM2G043182	0.212749	0.653283	normal	3.7961e-05	-1.58157	down	0.00683072	-0.940362	normal	0.0147468	-1.11475	normal	0.270186	-0.461578	normal	Mitochondrial carrier protein
GRMZM2G043183	0.619275	-0.252483	normal	6.23086e-07	-1.38585	down	5.64574e-07	-1.64101	down	3.47907e-06	-1.50286	down	2.75474e-06	-1.75735	down	Vps52 / Sac2 family
GRMZM2G043191	0.0269759	0.454274	normal	0.836584	0.0495613	normal	0.00929529	0.496057	normal	0.00426727	0.74901	normal	9.30985e-07	1.21596	up	Endonuclease/Exonuclease/phosphatase family
GRMZM2G043240	9.20633e-59	-2.76774	down	0.130147	-0.149526	normal	4.82157e-82	-2.93281	down	0.00860103	0.334374	normal	6.01658e-39	-2.43314	down	GDSL/SGNH-like Acyl-Esterase family found in Pmr5 and Cas1p
GRMZM2G043242	0.205618	0.291178	normal	0.0162868	0.481333	normal	0.000257619	0.76307	normal	0.00025836	0.864688	normal	1.05265e-06	1.16791	up	Morc6 ribosomal protein S5 domain 2-like
GRMZM2G043254	0.00503835	-1.24211	down	0.00771551	1.20086	up	--	--	--	0.116407	-0.747639	normal	0.000114503	-1.98301	down	Membrane transport protein
GRMZM2G043277	9.60039e-24	5.72925	up	--	--	--	5.02129e-17	3.25433	up	--	--	--	1.78446e-05	2.99069	up	Heme oxygenase
GRMZM2G043291	3.70559e-33	-1.88785	down	7.99658e-17	1.08246	up	1.53766e-06	-0.817124	normal	0.0622264	0.275041	normal	1.07138e-21	-1.60866	down	Glutathione S-transferase, N-terminal domain
GRMZM2G043295	0.37079	0.29041	normal	1.74523e-07	1.39771	up	6.73674e-11	1.68605	up	0.494404	-0.20681	normal	0.77101	0.0934172	normal	UDP-glucoronosyl and UDP-glucosyl transferase
GRMZM2G043300	--	--	--	0.682736	-0.211025	normal	3.19666e-08	-3.7117	down	--	--	--	--	--	--	Plastocyanin-like domain
GRMZM2G043301	--	--	--	1.12517e-05	-2.2268	down	0.0828074	-0.786659	normal	2.54383e-09	-2.89696	down	0.000791308	-1.44343	down	Multicopper oxidase
GRMZM2G043310	3.98806e-13	1.29372	up	0.0164981	-0.321014	normal	3.97106e-12	0.970781	normal	0.678555	0.0716815	normal	8.11613e-22	1.38354	up	Core-2/I-Branching enzyme
GRMZM2G043336	0.837448	0.0753143	normal	3.42306e-05	1.44289	up	6.97682e-05	1.50195	up	4.45941e-05	-0.981129	normal	0.000587113	-0.901051	normal	--
GRMZM2G043348	0.00606456	-0.576183	normal	1.13319e-09	-0.786511	normal	2.57114e-13	-1.36654	down	0.389412	0.165602	normal	0.0897412	-0.403568	normal	--
GRMZM2G043435	2.56723e-07	0.810144	normal	3.77173e-53	-1.22786	down	0.00233794	-0.419329	normal	0.64085	0.0610479	normal	1.43025e-09	0.883248	normal	Ferric reductase NAD binding domain
GRMZM2G043470	0.80052	0.112408	normal	0.424993	-0.328928	normal	0.581956	-0.22926	normal	0.000517821	-1.16696	down	0.000881468	-1.06332	down	Protein kinase domain
GRMZM2G043489	0.000496754	0.726703	normal	0.728697	-0.0887991	normal	0.0042887	0.627701	normal	0.112656	0.447746	normal	8.24569e-07	1.1869	up	Domain of unknown function (DUF4378)
GRMZM2G043493	0.579946	0.144749	normal	7.57319e-08	1.15913	up	2.11889e-08	1.29252	up	0.0038126	0.675328	normal	0.000605579	0.830843	normal	--
GRMZM2G043498	1.53256e-32	2.72187	up	4.23129e-45	-2.88586	down	0.40152	-0.165951	normal	0.152882	0.782272	normal	3.45272e-28	3.5452	up	--
GRMZM2G043500	0.000269337	1.09383	up	0.0207762	-0.706207	normal	0.118283	0.381974	normal	0.32822	-0.346328	normal	0.000192932	0.770279	normal	--
GRMZM2G043521	0.469775	-0.225148	normal	0.000701558	0.497831	normal	0.309159	0.25623	normal	3.16352e-10	-0.824975	normal	1.29691e-06	-1.04162	down	Protein of unknown function (DUF1264)
GRMZM2G043600	0.347725	-0.163511	normal	0.875065	0.0250061	normal	0.354873	-0.147585	normal	2.8367e-12	1.20605	up	1.41816e-08	1.05395	up	bZIP transcription factor
GRMZM2G043605	0.000289285	1.89438	up	--	--	--	0.136346	0.789593	normal	--	--	--	0.0955839	0.964971	normal	--
GRMZM2G043737	0.0829639	0.279627	normal	1.96136e-05	0.402489	normal	1.48326e-07	0.672452	normal	2.86557e-199	3.99258	up	7.96381e-163	4.28074	up	Plectin/S10 domain
GRMZM2G043799	2.65163e-06	-1.70761	down	1.29397e-07	1.18933	up	0.206832	-0.555969	normal	1.68115e-05	-0.803201	normal	2.21407e-14	-2.52486	down	Protein kinase domain
GRMZM2G043813	0.00500495	-1.23021	down	0.0434247	0.790907	normal	0.304838	-0.459369	normal	0.00889267	-0.893116	normal	3.62414e-11	-2.17845	down	No apical meristem (NAM) protein
GRMZM2G043857	0.00183229	-1.47339	down	0.694334	0.188422	normal	0.00791922	-1.28933	down	0.172849	-0.585571	normal	1.65404e-06	-2.10319	down	Domain of unknown function
GRMZM2G043893	0.739898	0.101764	normal	0.204468	-0.281671	normal	0.467848	-0.188289	normal	3.36108e-07	-1.12558	down	6.73903e-05	-1.01671	down	Cytosol aminopeptidase family, catalytic domain
GRMZM2G043932	0.344519	0.304915	normal	0.000170366	0.900441	normal	1.65096e-19	1.217	up	0.0739932	0.459595	normal	2.63507e-08	0.785048	normal	Heavy-metal-associated domain
GRMZM2G043943	0.248223	0.772911	normal	0.013401	-1.29467	normal	0.107012	-0.54969	normal	--	--	--	0.00310712	1.95876	up	Pectinesterase
GRMZM2G043980	6.46194e-30	6.98899	up	--	--	--	6.65875e-29	5.97094	up	--	--	--	2.78267e-10	2.557	up	Probable N6-adenine methyltransferase
GRMZM2G043992	1.4813e-09	1.96639	up	0.0305225	-0.889774	normal	0.00108515	1.05015	up	7.29298e-34	-3.13965	down	8.28195e-07	-1.14811	down	--
GRMZM2G044004	1.01381e-07	0.868284	normal	1.47386e-23	-1.29235	down	0.00141839	-0.430909	normal	0.472343	-0.166005	normal	0.000269153	0.710309	normal	Torus domain
GRMZM2G044027	2.50108e-12	0.807134	normal	0.435411	-0.0808476	normal	6.2037e-12	0.718278	normal	1.01364e-32	-1.0478	down	0.0597136	-0.230784	normal	GDP-mannose 4,6 dehydratase
GRMZM2G044104	0.0805801	0.937721	normal	--	--	--	5.53603e-07	3.20754	up	--	--	--	9.42707e-05	2.57655	up	Dirigent-like protein
GRMZM2G044107	1.42106e-19	2.8117	up	0.00130349	-1.39415	down	7.91729e-07	1.36264	up	9.3938e-12	-2.62361	down	0.71104	0.143009	normal	Glycosyl hydrolase family 3 C-terminal domain
GRMZM2G044126	0.810749	-0.0564278	normal	0.000400724	0.386128	normal	0.0678209	0.318282	normal	8.08286e-17	1.05873	up	1.58305e-08	1.00866	up	MOZ/SAS family
GRMZM2G044128	0.0164372	0.474801	normal	4.96377e-05	0.625155	normal	2.83441e-11	1.0915	up	8.89043e-09	-0.791522	normal	0.0788064	-0.305866	normal	DKCLD (NUC011) domain
GRMZM2G044132	0.0165013	1.36215	normal	0.00442089	-1.28492	down	0.748452	0.126356	normal	--	--	--	6.6775e-16	3.85971	up	ABA/WDS induced protein
GRMZM2G044143	0.115388	-0.530039	normal	0.812264	-0.0313069	normal	0.251014	-0.547215	normal	7.57732e-19	-0.707751	normal	0.00711607	-1.18866	down	Beige/BEACH domain
GRMZM2G044152	0.612745	0.0805115	normal	2.7299e-15	-0.572125	normal	1.08179e-08	-0.500085	normal	3.78015e-218	-2.14521	down	2.31119e-118	-2.05498	down	Zein seed storage protein
GRMZM2G044174	0.0751719	-1.20916	normal	0.000313819	-1.44681	down	1.36075e-09	-2.76415	down	1.34964e-05	-1.75605	down	1.40483e-11	-3.12312	down	--
GRMZM2G044194	6.51559e-07	1.44284	up	3.67765e-89	-2.63899	down	2.65606e-06	-1.15212	down	0.0284822	-0.443759	normal	0.000114617	1.0293	up	Phytosulfokine precursor protein (PSK)
GRMZM2G044301	0.082882	-0.397375	normal	1.29553e-05	1.28271	up	0.0126714	0.877429	normal	0.0214645	0.624319	normal	0.471388	0.238647	normal	JmjC domain, hydroxylase
GRMZM2G044317	0.210722	-0.350649	normal	3.02607e-05	1.13744	up	0.0177674	0.774772	normal	0.100565	-0.417606	normal	0.00582689	-0.761745	normal	Eukaryotic and archaeal DNA primase, large subunit
GRMZM2G044368	0.0811493	-0.334664	normal	1.59683e-34	-1.4085	down	8.43308e-74	-1.75743	down	0.00510346	-0.380652	normal	5.48244e-09	-0.709667	normal	Ras family
GRMZM2G044372	0.000995949	-1.50274	down	1.94353e-09	-1.63124	down	1.42289e-23	-3.18634	down	0.000155377	-1.24722	down	4.75732e-14	-2.80657	down	Orn/Lys/Arg decarboxylase, major domain
GRMZM2G044383	1.98751e-42	3.14441	up	3.31526e-13	-1.68947	down	1.83573e-30	1.4664	up	5.10009e-10	-1.69021	down	1.13332e-13	1.46665	up	Glutathione S-transferase, N-terminal domain
GRMZM2G044388	0.756274	-0.0836269	normal	6.13884e-18	-0.947798	normal	3.08036e-08	-1.03325	down	0.865424	0.0322288	normal	0.871623	-0.0440366	normal	F-box-like
GRMZM2G044438	5.46602e-18	5.43852	up	--	--	--	1.01867e-17	5.81378	up	--	--	--	9.93254e-17	6.45662	up	Myb/SANT-like DNA-binding domain
GRMZM2G044457	8.75069e-07	-0.697059	normal	0.662929	-0.0507912	normal	2.43139e-11	-0.758635	normal	6.87437e-58	2.1631	up	1.62255e-18	1.47476	up	Endoplasmic reticulum vesicle transporter
GRMZM2G044469	0.554277	-0.136001	normal	1.05827e-17	-1.12319	down	6.86603e-14	-1.26397	down	1.60958e-76	-2.03651	down	7.50831e-47	-2.16215	down	Molybdopterin-binding domain of aldehyde dehydrogenase
GRMZM2G044481	2.86234e-06	-3.54434	down	0.000500224	0.771594	normal	9.74131e-16	-4.03481	down	0.000328588	1.26486	up	3.74349e-07	-3.42956	down	Terpene synthase, N-terminal domain
GRMZM2G044498	0.018078	-0.444005	normal	8.85728e-19	1.17577	up	9.97376e-05	0.717907	normal	0.349129	0.182523	normal	0.304419	-0.253905	normal	--
GRMZM2G044503	0.000234594	1.2665	up	5.38098e-38	7.36903	up	3.45381e-45	8.36223	up	1.07952e-39	4.99617	up	7.29128e-17	5.62883	up	--
GRMZM2G044576	--	--	--	0.640476	0.286467	normal	--	--	--	6.46963e-10	-2.33233	down	2.59987e-17	-3.19075	down	GATA zinc finger
GRMZM2G044625	0.493566	-0.113121	normal	2.48983e-20	0.715211	normal	2.68064e-10	0.592077	normal	1.43146e-52	-1.12788	down	1.0023e-38	-1.23259	down	Zein seed storage protein
GRMZM2G044627	0.233902	-0.260841	normal	2.83517e-14	0.856811	normal	1.87115e-05	0.583467	normal	2.04367e-05	-0.769691	normal	1.47191e-14	-1.03093	down	Protein of unknown function (DUF1264)
GRMZM2G044629	0.00016263	0.666881	normal	2.43673e-22	-1.4031	down	5.54853e-06	-0.742908	normal	7.91611e-07	-0.749164	normal	0.697739	-0.0728947	normal	UTP--glucose-1-phosphate uridylyltransferase
GRMZM2G044733	0.0805129	-0.435512	normal	0.00513566	0.414609	normal	0.902379	-0.0342089	normal	2.08153e-15	1.41378	up	0.000124574	0.979489	normal	Autophagy-related protein 13
GRMZM2G044736	0.548901	0.335776	normal	--	--	--	0.00133675	2.13045	up	--	--	--	0.162012	1.24589	normal	Plant protein of unknown function (DUF641)
GRMZM2G044788	0.672789	-0.143339	normal	1.57561e-20	4.4274	up	2.27006e-16	4.25423	up	0.000213497	1.33468	up	0.00126627	1.21773	up	--
GRMZM2G044822	0.00367614	1.38017	up	1.81167e-07	-1.58565	down	0.762293	-0.146503	normal	0.00233136	-1.08259	down	0.453527	0.362529	normal	Late embryogenesis abundant protein
GRMZM2G044851	1.41852e-63	-3.1599	down	3.99241e-15	3.91875	up	0.0203674	1.14129	normal	5.23153e-41	1.96365	up	4.96828e-06	-1.19683	down	POT family
GRMZM2G044858	3.35123e-10	1.95852	up	6.59041e-11	-1.97428	down	0.926024	-0.0268847	normal	1.96723e-16	-2.42873	down	0.0573253	-0.462638	normal	--
GRMZM2G044898	0.466025	-0.327791	normal	3.02093e-07	1.68189	up	0.00427421	1.29978	up	0.00025448	1.52015	up	0.0285305	1.19524	normal	Myb/SANT-like DNA-binding domain
GRMZM2G044900	3.35312e-17	1.13007	up	4.70645e-31	-1.09698	down	0.821308	0.0279289	normal	0.0457289	0.247851	normal	2.28977e-38	1.39162	up	Protein of unknown function (DUF760)
GRMZM2G044947	4.73719e-27	2.03818	up	4.36753e-11	-1.16462	down	4.56497e-10	0.871913	normal	0.341511	-0.237777	normal	6.81426e-36	1.82302	up	GDSL-like Lipase/Acylhydrolase
GRMZM2G044968	0.000799512	0.550718	normal	1.52932e-67	2.39854	up	3.38516e-113	2.94586	up	1.02612e-73	2.67837	up	2.07133e-113	3.24785	up	GDP-fucose protein O-fucosyltransferase
GRMZM2G045155	0.030357	1.86939	normal	--	--	--	4.28352e-17	5.77664	up	--	--	--	2.02875e-103	6.40102	up	NADH-ubiquinone reductase complex 1 MLRQ subunit
GRMZM2G045171	--	--	--	--	--	--	--	--	--	9.40068e-39	-4.64299	down	5.4952e-14	-2.90077	down	Sucrose synthase
GRMZM2G045185	6.2452e-15	-1.04745	down	4.94099e-59	1.41185	up	0.0169471	0.349725	normal	0.0096444	0.240076	normal	2.67962e-09	-0.802327	normal	OTU-like cysteine protease
GRMZM2G045188	0.00290858	-1.23981	down	0.0216925	1.03292	normal	--	--	--	0.520732	-0.281704	normal	0.00027387	-1.53645	down	Transcriptional activator
GRMZM2G045215	1.31768e-45	2.43083	up	2.96673e-17	-1.5003	down	6.25913e-09	0.921188	normal	0.192365	-0.368494	normal	1.20154e-26	2.07009	up	GDSL-like Lipase/Acylhydrolase
GRMZM2G045236	2.23091e-10	-0.968436	normal	0.168159	0.130526	normal	9.87787e-09	-0.848503	normal	0.775915	-0.0383027	normal	4.52568e-10	-1.00008	down	bZIP transcription factor
GRMZM2G045270	2.26257e-10	1.97306	up	3.33288e-08	-2.25462	down	0.0363202	-0.390508	normal	0.0316355	-1.04767	normal	0.000194329	0.901881	normal	--
GRMZM2G045278	8.88966e-13	-1.57052	down	4.64182e-25	2.58125	up	0.00573816	0.997134	normal	0.417879	0.207929	normal	8.8073e-07	-1.3542	down	Universal stress protein family
GRMZM2G045286	0.000272557	-0.72092	normal	1.12247e-09	-0.879344	normal	5.18281e-27	-1.61306	down	3.32224e-05	0.86308	normal	0.564761	0.151668	normal	Ring finger domain
GRMZM2G045287	5.0876e-08	1.51097	up	5.13685e-14	-1.80471	down	0.185143	-0.297199	normal	8.06292e-11	-1.72633	down	0.426703	-0.205198	normal	Reversibly glycosylated polypeptide
GRMZM2G045318	3.86795e-06	1.01099	up	0.000149146	-0.59204	normal	0.0541049	0.416358	normal	2.96009e-08	-0.801254	normal	0.301454	0.2282	normal	--
GRMZM2G045387	0.332573	-0.153079	normal	0	2.71934	up	2.7675e-120	2.54901	up	1.02578e-50	1.05978	up	4.32171e-14	0.912633	normal	Zein seed storage protein
GRMZM2G045433	0.41583	-0.235059	normal	4.34956e-06	1.26864	up	0.00119988	1.02447	up	0.3983	-0.220457	normal	0.088839	-0.449378	normal	alpha/beta hydrolase fold
GRMZM2G045452	1.35884e-11	4.87593	up	--	--	--	3.6454e-10	4.45712	up	--	--	--	1.73478e-10	5.36621	up	Protein phosphatase 2C
GRMZM2G045550	2.92436e-07	1.22611	up	0.783564	-0.073937	normal	1.19277e-08	1.15021	up	0.0377011	-0.584412	normal	0.0178624	0.649432	normal	--
GRMZM2G045664	0.003228	-0.829287	normal	3.58442e-08	1.91894	up	1.40692e-08	1.14626	up	0.0356085	0.756355	normal	0.812288	-0.0557623	normal	Late embryogenesis abundant protein
GRMZM2G045675	0.0297204	-1.14043	normal	4.6259e-08	2.70429	up	0.0122224	1.52758	normal	0.217064	-0.529952	normal	2.86373e-05	-1.73557	down	Putative S-adenosyl-L-methionine-dependent methyltransferase
GRMZM2G045686	0.0025875	-1.1672	down	0.019138	-0.720877	normal	3.33267e-08	-1.90004	down	0.145494	-0.555464	normal	1.9056e-05	-1.72937	down	UAA transporter family
GRMZM2G045699	2.22764e-44	8.03031	up	1.02038e-20	-5.94284	down	1.21864e-13	1.9861	up	--	--	--	4.74627e-36	8.48988	up	--
GRMZM2G045720	1.35487e-34	-1.88672	down	2.38743e-199	4.2408	up	5.11345e-25	2.31912	up	1.83734e-38	-1.02347	down	1.85709e-95	-2.90639	down	eRF1 domain 2
GRMZM2G045732	3.10257e-17	-2.98115	down	5.69925e-15	2.65252	up	--	--	--	1.16017e-10	2.24657	up	--	--	--	Universal stress protein family
GRMZM2G045748	2.28422e-05	-1.56058	down	0.00269854	1.12677	up	0.451934	-0.418604	normal	0.0502373	-0.604456	normal	3.3573e-09	-2.17659	down	Myb-like DNA-binding domain
GRMZM2G045781	0.0138114	0.831934	normal	0.226689	0.477818	normal	0.000147891	1.30274	up	5.38205e-23	-2.24909	down	2.17053e-08	-1.3982	down	Permease family
GRMZM2G045808	0.082032	0.536742	normal	0.00934226	-0.766219	normal	0.467696	-0.240814	normal	0.0416962	0.726276	normal	1.33676e-05	1.29068	up	EB1-like C-terminal motif
GRMZM2G045809	1.06807e-07	-0.703101	normal	2.01675e-52	1.06888	up	0.00311667	0.35223	normal	2.06327e-75	1.77622	up	2.23406e-13	1.07634	up	Cupin
GRMZM2G045834	0.00227096	-0.939928	normal	0.225685	-0.292336	normal	4.84247e-05	-1.23512	down	0.334369	0.260872	normal	0.0441656	-0.679021	normal	--
GRMZM2G045892	0.497078	-0.109746	normal	3.97251e-34	1.2387	up	6.53859e-18	1.11706	up	6.76898e-10	-0.55792	normal	1.1726e-07	-0.658601	normal	Cyclin M transmembrane N-terminal domain
GRMZM2G045927	--	--	--	--	--	--	--	--	--	0.000208331	-2.62218	down	2.08482e-11	-5.52138	down	Plastocyanin-like domain
GRMZM2G045955	0.779923	0.277154	normal	--	--	--	0.839197	0.187365	normal	4.23258e-10	-2.70785	down	0.0632057	-1.78039	normal	--
[truncated: 11,796 more rows]
