# Supplementary material for: Genetic basis of the oil biosynthesis in ultra-high-oil maize grains with an oil content exceeding 20%
Source: Frontiers journal article supplement (doi:10.3389/fpls.2023.1168216), 2023-05-12
Supplement: Table_3.xls [file Table_3.xls]

## Sheet: Sheet1
Supplementary Table 3 Maize grain oil content-related QTLs identified by BSA-seq
Chromosome	Position (bp) B73 RefGen_V4	Algorithm and confidence level used	Co-localized QTL (reference)	Candidate gene
1	48070001–50060000	ED (95%)
1	50400001–51400000	ED (95%)
1	54930001–61270000	ED (95%)
1	61410001–63460000	ED (95%)	Fang et al., 2021
1	64630001–66590000	ED (95%)	Fang et al., 2021
1	68400001–69990000	ED (95%)	Fang et al., 2021
1	70470001–72250000	ED (95%)	Fang et al., 2021
1	72380001–75710000	ED (95%)
1	75870001–78350000	ED (95%)
1	78470001–79470000	ED (95%)
1	82830001–84800000	ED (95%)
1	86250001–87600000	ED (95%)
1	88560001–90550000	ED (95%)
1	162360001–164370000	ED (95%)
1	168450001–170590000	ED (95%)
1	171620001–176080000	ED (95%)
1	176310001–178790000	ED (95%)
1	180010001–183670000	ED (95%)
1	187970001–189290000	ED (95%)
1	189370001–193250000	ED (95%)
1	193260001–195150000	ED (95%)
1	198030001–206170000	ED (95%)	Fang et al., 2021
1	207450001–212870000	ED (95%)
1	213020001–214320000	ED (95%)
1	221570001–222780000	ED (95%)
1	224660001–225680000	ED (95%)
1	226550001–231630000	ED (95%)
1	232660001–234950000	ED (95%)
1	235320001–237590000	ED (95%)		Zm00001d032728 (GRMZM2G167438), encoding 3-ketoacyl-CoA synthase (KCS12)
1	237890001–241230000	ED (95%)
1	242260001–243260000	ED (95%)
1	243430001–244910000	ED (95%)		Zm00001d032948 (GRMZM2G162508), encoding 3-ketoacyl-CoA synthase (KCS20)
1	251330001–253520000	ED (95%)
2	147200001–148640000	ED (95%)
2	149730001–153060000	ED (95%)
2	153110001–156430000	ED (95%)
2	157910001–158970000	ED (95%)
2	166240001–168250000	ED (95%)
2	170930001–173810000	ED (95%)
2	175980001–177520000	ED (95%)
2	177960001–180870000	ED (95%)
2	185590001–186860000	ED (95%)
2	192800001–194000000	ED (95%)
2	212910001–214480000	ED (95%)
2	225690001–227460000	ED (95%)
2	232670001–233670000	ED (95%)
2	236600001–238230000	ED (95%)
2	239320001–240930000	ED (95%)	Fang et al., 2021
2	241010001–242930000	ED (95%)
3	16820001–18930000	ED (95%)
3	155670001–157020000	ED (95%)	Fang et al., 2021
3	186770001–189820000	ED (95%)
3	197860001–199280000	ED (95%)	Fang et al., 2021
3	219440001–220520000	ED (95%)	Fang et al., 2021	Zm00001d044136 (GRMZM2G065203), encoding glycerol-3-phosphate acyltransferase 1
3	231380001–232390000	ED (95%)
4	25160001–27610000	ED (95%) and (SNP-index (95%)
4	96110001–97490000	ED (95%) and (SNP-index (95%)	Fang et al., 2021
4	104030001–106150000	ED (95%) and (SNP-index (95%)	Fang et al., 2021
4	116620001–118890000	ED (95%)	Fang et al., 2021
4	130200001–132170000	ED (95%) and (SNP-index (95%)
4	168690001–175140000	ED (95%)	Fang et al., 2021	Zm00001d051749 (GRMZM2G021339), encoding homeobox-transcription factor 115
5	101870001–103870000	ED (95%)
5	129540001–131520000	ED (95%)
5	142780001–143830000	ED (95%)
5	147960001–149950000	ED (95%)
5	163870001–165230000	ED (95%)
5	221380001–222570000	ED (95%)
6	12470001–13470000	ED (95%)
7	5800001–9960000	ED (95%)	Fang et al., 2021
7	14670001–16580000	ED (95%)
7	16760001–17790000	ED (95%)
7	117590001–118590000	ED (95%)
7	120220001–121280000	ED (95%)
7	125110001–128640000	ED (95%)	Fang et al., 2021
8	7630001–9620000	ED (95%)
9	21360001–22700000	ED (95%)
9	96190001–98180000	ED (95%)	Fang et al., 2021
9	103270001–105800000	ED (95%)
10	13600001–15450000	ED (95%)
10	26550001–29280000	ED (95%)
10	34460001–36510000	ED (95%)
10	38670001–41530000	ED (95%)
10	54880001–56440000	ED (95%)
10	66490001–67500000	ED (95%)
10	78590001–81030000	ED (95%)
10	83530001–85170000	ED (95%)
10	85170001–87230000	ED (95%)
10	88000001–110710000	ED (95%)		Zm00001d024885 (GRMZM2G176998), encoding putative WD40-like beta propeller repeat family protein
